# Supplementary material
Source: bioRxiv or medRxiv preprint supplement (https://www.biorxiv.org/content/biorxiv/early/2021/05/08/2021.05.07.443164.1/DC2/embed/media-2.pdf)
Supplement: Supplementary file [file media-2.pdf]

**Supplementary Table 2:** Differentially expressed genes ( $n=2265$ ) between control Airway Lung-Chip and transwell epithelial cells

| ID              | GeneName | log2FC | p value  | p value adjusted |
|-----------------|----------|--------|----------|------------------|
| ENSG00000138166 | DUSP5    | -2,71  | 1,14E-60 | 2,21E-56         |
| ENSG00000175592 | FOSL1    | -2,54  | 9,79E-60 | 9,51E-56         |
| ENSG00000142871 | CYR61    | -2,92  | 4,09E-46 | 2,65E-42         |
| ENSG00000067082 | KLF6     | -1,94  | 1,30E-42 | 6,32E-39         |
| ENSG00000117616 | C1orf63  | 1,38   | 2,19E-37 | 8,50E-34         |
| ENSG00000005108 | THSD7A   | -3,50  | 2,64E-36 | 8,53E-33         |
| ENSG00000173706 | HEG1     | -1,86  | 4,37E-35 | 1,21E-31         |
| ENSG00000116285 | ERRFI1   | -1,74  | 2,70E-34 | 6,55E-31         |
| ENSG00000108828 | VAT1     | -1,21  | 7,84E-32 | 1,69E-28         |
| ENSG00000101443 | WFDC2    | 1,29   | 9,40E-32 | 1,83E-28         |
| ENSG00000112182 | BACH2    | -2,76  | 1,15E-29 | 2,03E-26         |
| ENSG00000125740 | FOSB     | -2,80  | 3,89E-29 | 6,30E-26         |
| ENSG00000117289 | TXNIP    | 1,60   | 8,49E-29 | 1,27E-25         |
| ENSG00000185950 | IRS2     | -1,88  | 1,26E-28 | 1,75E-25         |
| ENSG00000118503 | TNFAIP3  | -2,32  | 1,87E-27 | 2,42E-24         |
| ENSG00000122861 | PLAU     | -1,56  | 2,38E-27 | 2,89E-24         |
| ENSG00000232810 | TNF      | -3,45  | 4,61E-27 | 5,27E-24         |
| ENSG00000078401 | EDN1     | -3,02  | 6,21E-27 | 6,70E-24         |
| ENSG00000135069 | PSAT1    | -2,41  | 8,33E-27 | 8,52E-24         |
| ENSG00000116717 | GADD45A  | -1,31  | 4,20E-25 | 4,07E-22         |
| ENSG00000128965 | CHAC1    | -1,87  | 5,78E-25 | 5,34E-22         |
| ENSG00000065717 | TLE2     | 1,29   | 1,05E-23 | 9,24E-21         |
| ENSG00000185022 | MAFF     | -1,39  | 1,34E-22 | 1,13E-19         |
| ENSG00000129521 | EGLN3    | 1,65   | 4,49E-22 | 3,64E-19         |
| ENSG00000137193 | PIM1     | -1,82  | 4,72E-22 | 3,67E-19         |
| ENSG00000169252 | ADRB2    | -1,53  | 1,13E-21 | 8,47E-19         |
| ENSG00000168003 | SLC3A2   | -1,60  | 2,18E-21 | 1,57E-18         |
| ENSG00000078081 | LAMP3    | -2,10  | 2,19E-20 | 1,52E-17         |
| ENSG00000179148 | ALOXE3   | -3,03  | 6,72E-20 | 4,50E-17         |
| ENSG00000115963 | RND3     | -1,04  | 7,90E-20 | 5,12E-17         |
| ENSG00000135318 | NT5E     | -1,39  | 1,54E-19 | 9,67E-17         |
| ENSG00000137801 | THBS1    | -2,15  | 1,70E-19 | 1,03E-16         |
| ENSG00000151012 | SLC7A11  | -1,85  | 3,25E-19 | 1,91E-16         |
| ENSG00000143878 | RHOB     | -1,71  | 3,83E-19 | 2,19E-16         |
| ENSG00000128591 | FLNC     | -2,83  | 3,96E-19 | 2,20E-16         |
| ENSG00000127666 | TICAM1   | -1,16  | 4,14E-19 | 2,23E-16         |
| ENSG00000146112 | PPP1R18  | -1,44  | 4,45E-19 | 2,34E-16         |
| ENSG00000110777 | POU2AF1  | 1,43   | 5,77E-19 | 2,95E-16         |
| ENSG00000122254 | HS3ST2   | -3,08  | 9,42E-19 | 4,69E-16         |
| ENSG00000187840 | EIF4EBP1 | -1,53  | 1,03E-18 | 4,98E-16         |
| ENSG00000130766 | SESN2    | -1,46  | 1,76E-18 | 8,33E-16         |

|                 |           |       |          |          |
|-----------------|-----------|-------|----------|----------|
| ENSG00000101255 | TRIB3     | -2,90 | 8,40E-18 | 3,88E-15 |
| ENSG00000256612 | CYP2B7P   | 1,21  | 1,34E-17 | 6,07E-15 |
| ENSG00000165272 | AQP3      | 1,52  | 2,10E-17 | 9,26E-15 |
| ENSG00000106105 | GARS      | -1,30 | 2,25E-17 | 9,70E-15 |
| ENSG00000116741 | RGS2      | 1,74  | 2,42E-17 | 1,02E-14 |
| ENSG00000139289 | PHLDA1    | -1,57 | 2,95E-17 | 1,22E-14 |
| ENSG00000065911 | MTHFD2    | -1,46 | 4,59E-17 | 1,86E-14 |
| ENSG00000124762 | CDKN1A    | -1,41 | 5,19E-17 | 2,06E-14 |
| ENSG00000073008 | PVR       | -1,43 | 7,93E-17 | 3,08E-14 |
| ENSG00000168646 | AXIN2     | 1,84  | 1,48E-16 | 5,62E-14 |
| ENSG00000221968 | FADS3     | -2,06 | 2,89E-16 | 1,08E-13 |
| ENSG00000069869 | NEDD4     | -1,15 | 4,72E-16 | 1,73E-13 |
| ENSG00000179388 | EGR3      | -2,27 | 4,98E-16 | 1,79E-13 |
| ENSG00000212724 | KRTAP2-3  | -2,93 | 8,37E-16 | 2,96E-13 |
| ENSG00000013441 | CLK1      | 1,32  | 8,67E-16 | 3,01E-13 |
| ENSG00000163734 | CXCL3     | -2,24 | 1,17E-15 | 3,99E-13 |
| ENSG00000120254 | MTHFD1L   | -1,23 | 1,53E-15 | 5,14E-13 |
| ENSG00000113070 | HBEGF     | -1,41 | 2,32E-15 | 7,65E-13 |
| ENSG00000078018 | MAP2      | -2,23 | 2,67E-15 | 8,65E-13 |
| ENSG00000130598 | TNNI2     | 1,83  | 3,35E-15 | 1,07E-12 |
| ENSG00000138675 | FGF5      | -2,27 | 5,70E-15 | 1,78E-12 |
| ENSG00000149043 | SYT8      | 1,27  | 6,96E-15 | 2,15E-12 |
| ENSG00000102032 | RENBP     | -2,64 | 7,31E-15 | 2,22E-12 |
| ENSG00000188522 | FAM83G    | -1,30 | 9,22E-15 | 2,76E-12 |
| ENSG00000103257 | SLC7A5    | -1,87 | 9,49E-15 | 2,79E-12 |
| ENSG00000104419 | NDRG1     | 1,34  | 1,34E-14 | 3,89E-12 |
| ENSG00000109321 | AREG      | -1,86 | 1,46E-14 | 4,12E-12 |
| ENSG00000196123 | KIAA0895L | 0,83  | 1,46E-14 | 4,12E-12 |
| ENSG00000120738 | EGR1      | -1,48 | 2,57E-14 | 7,13E-12 |
| ENSG00000033327 | GAB2      | -1,64 | 3,78E-14 | 1,03E-11 |
| ENSG00000173846 | PLK3      | -1,68 | 4,44E-14 | 1,20E-11 |
| ENSG00000074416 | MGLL      | -1,55 | 4,65E-14 | 1,24E-11 |
| ENSG00000163638 | ADAMTS9   | -2,64 | 7,33E-14 | 1,92E-11 |
| ENSG00000153132 | CLGN      | -1,84 | 8,08E-14 | 2,09E-11 |
| ENSG00000140105 | WARS      | -1,33 | 1,06E-13 | 2,70E-11 |
| ENSG00000134531 | EMP1      | -1,23 | 1,22E-13 | 3,07E-11 |
| ENSG00000114019 | AMOTL2    | -0,93 | 1,47E-13 | 3,65E-11 |
| ENSG00000184545 | DUSP8     | -1,31 | 1,57E-13 | 3,87E-11 |
| ENSG00000196167 | COLCA1    | 1,51  | 1,66E-13 | 4,03E-11 |
| ENSG00000166016 | ABTB2     | -1,18 | 2,07E-13 | 4,97E-11 |
| ENSG00000090339 | ICAM1     | -1,34 | 2,36E-13 | 5,58E-11 |
| ENSG00000115556 | PLCD4     | 1,87  | 2,63E-13 | 6,15E-11 |
| ENSG00000106070 | GRB10     | -1,59 | 3,10E-13 | 7,16E-11 |
| ENSG00000070669 | ASNS      | -1,52 | 3,46E-13 | 7,92E-11 |

|                 |               |       |          |          |
|-----------------|---------------|-------|----------|----------|
| ENSG00000128165 | ADM2          | -2,10 | 3,93E-13 | 8,87E-11 |
| ENSG00000115902 | SLC1A4        | -1,49 | 4,34E-13 | 9,70E-11 |
| ENSG00000138623 | SEMA7A        | -2,46 | 4,49E-13 | 9,91E-11 |
| ENSG00000137331 | IER3          | -1,40 | 5,67E-13 | 1,24E-10 |
| ENSG00000100889 | PCK2          | -1,50 | 6,32E-13 | 1,36E-10 |
| ENSG00000181026 | AEN           | -1,16 | 7,15E-13 | 1,53E-10 |
| ENSG00000079308 | TNS1          | 1,60  | 8,55E-13 | 1,81E-10 |
| ENSG00000141753 | IGFBP4        | 0,75  | 1,00E-12 | 2,06E-10 |
| ENSG00000164038 | SLC9B2        | -1,32 | 1,00E-12 | 2,06E-10 |
| ENSG00000178726 | THBD          | -1,75 | 1,01E-12 | 2,06E-10 |
| ENSG00000130294 | KIF1A         | -2,61 | 1,03E-12 | 2,09E-10 |
| ENSG00000113739 | STC2          | -1,96 | 1,06E-12 | 2,12E-10 |
| ENSG00000233539 | AC011294.3    | 1,55  | 1,09E-12 | 2,14E-10 |
| ENSG00000269609 | RP11-18114.10 | 1,37  | 1,09E-12 | 2,14E-10 |
| ENSG00000247095 | MIR210HG      | 1,26  | 1,17E-12 | 2,28E-10 |
| ENSG00000134954 | ETS1          | -0,82 | 1,29E-12 | 2,48E-10 |
| ENSG00000115008 | IL1A          | -2,22 | 1,32E-12 | 2,51E-10 |
| ENSG00000031698 | SARS          | -0,97 | 1,53E-12 | 2,88E-10 |
| ENSG00000153879 | CEBPG         | -0,95 | 1,62E-12 | 3,02E-10 |
| ENSG00000047457 | CP            | 0,85  | 1,87E-12 | 3,45E-10 |
| ENSG00000128641 | MYO1B         | -1,01 | 2,50E-12 | 4,58E-10 |
| ENSG00000173253 | DMRT2         | 1,44  | 2,81E-12 | 5,10E-10 |
| ENSG00000151623 | NR3C2         | -1,26 | 3,30E-12 | 5,94E-10 |
| ENSG00000143867 | OSR1          | 1,63  | 3,86E-12 | 6,89E-10 |
| ENSG00000143322 | ABL2          | -0,87 | 4,74E-12 | 8,37E-10 |
| ENSG00000170577 | SIX2          | 0,84  | 4,87E-12 | 8,53E-10 |
| ENSG00000035664 | DAPK2         | 1,38  | 5,36E-12 | 9,29E-10 |
| ENSG00000073756 | PTGS2         | -2,07 | 6,41E-12 | 1,10E-09 |
| ENSG00000183018 | SPNS2         | -1,40 | 6,51E-12 | 1,11E-09 |
| ENSG00000237187 | NR2F1-AS1     | 1,25  | 6,69E-12 | 1,13E-09 |
| ENSG00000142178 | SIK1          | -1,27 | 6,95E-12 | 1,16E-09 |
| ENSG00000011422 | PLAUR         | -1,68 | 7,41E-12 | 1,23E-09 |
| ENSG00000244242 | IFITM10       | 1,51  | 8,53E-12 | 1,40E-09 |
| ENSG00000113240 | CLK4          | 0,92  | 8,93E-12 | 1,46E-09 |
| ENSG00000167995 | BEST1         | -2,09 | 9,25E-12 | 1,50E-09 |
| ENSG00000169992 | NLGN2         | 0,88  | 1,01E-11 | 1,63E-09 |
| ENSG00000121310 | ECHDC2        | 0,66  | 1,12E-11 | 1,78E-09 |
| ENSG00000198719 | DLL1          | 1,13  | 1,25E-11 | 1,98E-09 |
| ENSG00000092621 | PHGDH         | -1,58 | 1,50E-11 | 2,34E-09 |
| ENSG00000189410 | SH2D5         | -2,07 | 1,56E-11 | 2,43E-09 |
| ENSG00000187678 | SPRY4         | -1,70 | 1,67E-11 | 2,57E-09 |
| ENSG00000153446 | C16orf89      | 1,62  | 1,86E-11 | 2,82E-09 |
| ENSG00000197446 | CYP2F1        | 1,88  | 1,86E-11 | 2,82E-09 |
| ENSG00000147437 | GNRH1         | 1,98  | 1,99E-11 | 2,99E-09 |

|                 |               |       |          |          |
|-----------------|---------------|-------|----------|----------|
| ENSG00000120217 | CD274         | -1,27 | 2,05E-11 | 3,07E-09 |
| ENSG00000153823 | PID1          | -2,25 | 2,38E-11 | 3,52E-09 |
| ENSG00000116001 | TIA1          | 0,71  | 2,41E-11 | 3,53E-09 |
| ENSG00000122420 | PTGFR         | 1,15  | 2,42E-11 | 3,53E-09 |
| ENSG00000115112 | TFCP2L1       | 1,55  | 2,64E-11 | 3,82E-09 |
| ENSG00000118508 | RAB32         | -1,40 | 3,32E-11 | 4,78E-09 |
| ENSG00000214279 | RP11-108K14.4 | 1,31  | 3,88E-11 | 5,54E-09 |
| ENSG00000231389 | HLA-DPA1      | -1,28 | 4,34E-11 | 6,15E-09 |
| ENSG00000110619 | CARS          | -0,68 | 4,54E-11 | 6,39E-09 |
| ENSG00000166173 | LARP6         | -1,09 | 4,79E-11 | 6,70E-09 |
| ENSG00000178031 | ADAMTSL1      | 2,47  | 5,08E-11 | 7,05E-09 |
| ENSG00000177606 | JUN           | -1,34 | 5,35E-11 | 7,38E-09 |
| ENSG00000173559 | NABP1         | -0,85 | 5,66E-11 | 7,74E-09 |
| ENSG00000088340 | FER1L4        | 0,98  | 7,39E-11 | 9,90E-09 |
| ENSG00000110944 | IL23A         | -1,98 | 7,36E-11 | 9,90E-09 |
| ENSG00000172548 | NIPAL4        | -2,31 | 7,30E-11 | 9,90E-09 |
| ENSG00000184575 | XPOT          | -0,97 | 7,68E-11 | 1,02E-08 |
| ENSG00000111981 | ULBP1         | -2,32 | 7,82E-11 | 1,03E-08 |
| ENSG00000136404 | TM6SF1        | -1,81 | 7,99E-11 | 1,04E-08 |
| ENSG00000181472 | ZBTB2         | -0,80 | 7,94E-11 | 1,04E-08 |
| ENSG00000125657 | TNFSF9        | -1,49 | 8,18E-11 | 1,05E-08 |
| ENSG00000162892 | IL24          | -2,45 | 8,17E-11 | 1,05E-08 |
| ENSG00000180573 | HIST1H2AC     | -0,89 | 8,35E-11 | 1,07E-08 |
| ENSG00000139514 | SLC7A1        | -1,37 | 8,70E-11 | 1,10E-08 |
| ENSG00000204305 | AGER          | 1,15  | 1,20E-10 | 1,51E-08 |
| ENSG00000099860 | GADD45B       | -1,40 | 1,28E-10 | 1,61E-08 |
| ENSG00000138772 | ANXA3         | -1,33 | 1,35E-10 | 1,68E-08 |
| ENSG00000177614 | PGBD5         | -1,88 | 1,42E-10 | 1,75E-08 |
| ENSG00000162772 | ATF3          | -1,84 | 1,46E-10 | 1,79E-08 |
| ENSG00000169429 | IL8           | -1,69 | 1,49E-10 | 1,82E-08 |
| ENSG00000008517 | IL32          | -1,97 | 1,52E-10 | 1,85E-08 |
| ENSG00000231160 | RP11-617D20.1 | 1,34  | 1,57E-10 | 1,89E-08 |
| ENSG00000156510 | HKDC1         | -1,94 | 1,60E-10 | 1,92E-08 |
| ENSG00000226332 | RP11-157P1.4  | 1,14  | 1,70E-10 | 2,02E-08 |
| ENSG00000196924 | FLNA          | -1,53 | 1,78E-10 | 2,10E-08 |
| ENSG00000203668 | CHML          | -1,46 | 1,78E-10 | 2,10E-08 |
| ENSG00000116954 | RRAGC         | -0,90 | 2,02E-10 | 2,36E-08 |
| ENSG00000100599 | RIN3          | -0,76 | 2,03E-10 | 2,36E-08 |
| ENSG00000107984 | DKK1          | -1,32 | 2,04E-10 | 2,36E-08 |
| ENSG00000103034 | NDRG4         | -2,02 | 2,07E-10 | 2,38E-08 |
| ENSG00000110047 | EHD1          | -0,86 | 2,16E-10 | 2,46E-08 |
| ENSG00000133816 | MICAL2        | -1,07 | 2,20E-10 | 2,50E-08 |
| ENSG00000174788 | PCP2          | 2,18  | 2,36E-10 | 2,67E-08 |
| ENSG00000115756 | HPCAL1        | -0,86 | 2,66E-10 | 2,99E-08 |

|                 |               |       |          |          |
|-----------------|---------------|-------|----------|----------|
| ENSG00000104892 | KLC3          | -1,29 | 2,76E-10 | 3,08E-08 |
| ENSG00000196365 | LONP1         | -0,77 | 2,90E-10 | 3,22E-08 |
| ENSG00000198759 | EGFL6         | 1,52  | 3,04E-10 | 3,36E-08 |
| ENSG00000167107 | ACSF2         | 0,99  | 3,08E-10 | 3,36E-08 |
| ENSG00000196878 | LAMB3         | -1,02 | 3,08E-10 | 3,36E-08 |
| ENSG00000128342 | LIF           | -1,61 | 3,17E-10 | 3,44E-08 |
| ENSG00000253525 | CTD-2114J12.1 | 0,82  | 3,25E-10 | 3,51E-08 |
| ENSG00000099849 | RASSF7        | 0,73  | 3,36E-10 | 3,60E-08 |
| ENSG00000189171 | S100A13       | 0,88  | 3,52E-10 | 3,75E-08 |
| ENSG00000172059 | KLF11         | -1,29 | 3,77E-10 | 4,00E-08 |
| ENSG00000040608 | RTN4R         | -1,35 | 4,02E-10 | 4,22E-08 |
| ENSG00000127947 | PTPN12        | -0,68 | 4,02E-10 | 4,22E-08 |
| ENSG00000136997 | MYC           | -1,12 | 4,39E-10 | 4,58E-08 |
| ENSG00000167657 | DAPK3         | -0,97 | 4,56E-10 | 4,74E-08 |
| ENSG00000071054 | MAP4K4        | -0,68 | 4,71E-10 | 4,87E-08 |
| ENSG00000137124 | ALDH1B1       | -1,14 | 5,13E-10 | 5,28E-08 |
| ENSG00000076706 | MCAM          | -2,15 | 5,23E-10 | 5,34E-08 |
| ENSG00000155792 | DEPTOR        | 1,02  | 5,59E-10 | 5,68E-08 |
| ENSG00000105499 | PLA2G4C       | -2,17 | 6,87E-10 | 6,95E-08 |
| ENSG00000169826 | CSGALNACT2    | -1,23 | 7,24E-10 | 7,28E-08 |
| ENSG00000197408 | CYP2B6        | 1,86  | 7,38E-10 | 7,39E-08 |
| ENSG00000182319 | SGK223        | -0,93 | 7,46E-10 | 7,43E-08 |
| ENSG00000189060 | H1FO          | -0,83 | 7,78E-10 | 7,71E-08 |
| ENSG00000087074 | PPP1R15A      | -1,15 | 7,98E-10 | 7,83E-08 |
| ENSG00000113758 | DBN1          | -0,96 | 7,95E-10 | 7,83E-08 |
| ENSG00000180902 | D2HGDH        | 0,82  | 8,41E-10 | 8,21E-08 |
| ENSG00000161048 | NAPEPLD       | 1,09  | 8,60E-10 | 8,35E-08 |
| ENSG00000183401 | CCDC159       | 1,02  | 8,73E-10 | 8,43E-08 |
| ENSG00000196517 | SLC6A9        | -0,97 | 8,83E-10 | 8,49E-08 |
| ENSG00000146674 | IGFBP3        | 1,51  | 9,30E-10 | 8,89E-08 |
| ENSG00000198807 | PAX9          | 0,89  | 1,10E-09 | 1,05E-07 |
| ENSG00000100321 | SYNGR1        | 1,21  | 1,17E-09 | 1,11E-07 |
| ENSG00000066697 | MSANTD3       | -1,08 | 1,29E-09 | 1,22E-07 |
| ENSG00000052802 | MSMO1         | -0,77 | 1,32E-09 | 1,24E-07 |
| ENSG00000207607 | MIR200A       | 1,46  | 1,53E-09 | 1,43E-07 |
| ENSG00000099622 | CIRBP         | 0,97  | 1,55E-09 | 1,44E-07 |
| ENSG00000156675 | RAB11FIP1     | -0,73 | 1,60E-09 | 1,48E-07 |
| ENSG00000060982 | BCAT1         | -1,82 | 1,74E-09 | 1,59E-07 |
| ENSG00000075213 | SEMA3A        | 1,27  | 1,73E-09 | 1,59E-07 |
| ENSG00000116883 | RP11-268J15.5 | 1,12  | 1,74E-09 | 1,59E-07 |
| ENSG00000154342 | WNT3A         | 1,87  | 1,78E-09 | 1,62E-07 |
| ENSG00000164266 | SPINK1        | -2,26 | 1,84E-09 | 1,66E-07 |
| ENSG00000223865 | HLA-DPB1      | -1,57 | 1,84E-09 | 1,66E-07 |
| ENSG00000184009 | ACTG1         | -0,81 | 1,91E-09 | 1,71E-07 |

|                 |                |       |          |          |
|-----------------|----------------|-------|----------|----------|
| ENSG00000233930 | KRTAP5-AS1     | -1,53 | 2,03E-09 | 1,81E-07 |
| ENSG00000081041 | CXCL2          | -2,03 | 2,21E-09 | 1,96E-07 |
| ENSG00000026559 | KCNG1          | -1,83 | 2,34E-09 | 2,07E-07 |
| ENSG00000182700 | IGIP           | 0,92  | 2,38E-09 | 2,09E-07 |
| ENSG00000119514 | GALNT12        | 0,85  | 2,58E-09 | 2,25E-07 |
| ENSG00000158406 | HIST1H4H       | -1,32 | 2,58E-09 | 2,25E-07 |
| ENSG00000272141 | RP11-465B22.8  | 1,13  | 2,64E-09 | 2,29E-07 |
| ENSG00000261326 | RP5-1057J7.6   | 1,04  | 2,86E-09 | 2,47E-07 |
| ENSG00000179041 | RRS1           | -0,85 | 2,96E-09 | 2,54E-07 |
| ENSG00000092295 | TGM1           | 1,48  | 2,98E-09 | 2,55E-07 |
| ENSG00000134070 | IRAK2          | -1,32 | 3,01E-09 | 2,56E-07 |
| ENSG00000167962 | ZNF598         | -0,70 | 3,03E-09 | 2,57E-07 |
| ENSG00000125845 | BMP2           | -1,48 | 3,21E-09 | 2,71E-07 |
| ENSG00000223559 | RP11-700P18.1  | -0,94 | 3,23E-09 | 2,71E-07 |
| ENSG00000153294 | GPR115         | -1,58 | 3,41E-09 | 2,86E-07 |
| ENSG00000100906 | NFKBIA         | -1,24 | 3,49E-09 | 2,91E-07 |
| ENSG00000131711 | MAP1B          | -1,33 | 3,53E-09 | 2,92E-07 |
| ENSG00000269516 | CYP4F23P       | 1,12  | 3,52E-09 | 2,92E-07 |
| ENSG00000198932 | GPRASP1        | 1,18  | 3,70E-09 | 3,05E-07 |
| ENSG00000143507 | DUSP10         | -1,05 | 4,01E-09 | 3,29E-07 |
| ENSG00000210195 | MT-TT          | -1,56 | 4,73E-09 | 3,86E-07 |
| ENSG00000142765 | SYTL1          | 0,69  | 5,27E-09 | 4,28E-07 |
| ENSG00000206538 | VGLL3          | -1,90 | 5,64E-09 | 4,57E-07 |
| ENSG00000127561 | SYNGR3         | -1,58 | 5,93E-09 | 4,78E-07 |
| ENSG00000225828 | FAM229A        | 0,90  | 6,23E-09 | 5,00E-07 |
| ENSG00000116701 | NCF2           | -1,44 | 6,51E-09 | 5,20E-07 |
| ENSG00000164879 | CA3            | 1,06  | 6,79E-09 | 5,40E-07 |
| ENSG00000255031 | RP11-802E16.3  | 0,98  | 7,10E-09 | 5,63E-07 |
| ENSG00000065054 | SLC9A3R2       | 0,95  | 7,39E-09 | 5,82E-07 |
| ENSG00000183837 | PNMA3          | 1,83  | 7,40E-09 | 5,82E-07 |
| ENSG00000182853 | VMO1           | 1,01  | 7,60E-09 | 5,95E-07 |
| ENSG00000269858 | EGLN2          | 0,75  | 8,14E-09 | 6,35E-07 |
| ENSG00000111077 | TENC1          | 0,90  | 8,97E-09 | 6,92E-07 |
| ENSG00000137936 | BCAR3          | -1,14 | 8,91E-09 | 6,92E-07 |
| ENSG00000168056 | LTBP3          | 0,63  | 8,96E-09 | 6,92E-07 |
| ENSG00000159674 | SPON2          | 1,40  | 9,22E-09 | 7,08E-07 |
| ENSG00000164548 | TRA2A          | 0,64  | 9,66E-09 | 7,38E-07 |
| ENSG00000149573 | MPZL2          | 0,85  | 9,80E-09 | 7,44E-07 |
| ENSG00000272216 | LL22NC03-2H8.5 | 1,00  | 9,80E-09 | 7,44E-07 |
| ENSG00000163874 | ZC3H12A        | -1,31 | 1,05E-08 | 7,95E-07 |
| ENSG00000124006 | OBSL1          | 0,79  | 1,19E-08 | 8,99E-07 |
| ENSG00000172602 | RND1           | -1,78 | 1,27E-08 | 9,54E-07 |
| ENSG00000111912 | NCOA7          | -1,17 | 1,44E-08 | 1,07E-06 |
| ENSG00000118523 | CTGF           | -1,36 | 1,46E-08 | 1,09E-06 |

|                 |          |       |          |          |
|-----------------|----------|-------|----------|----------|
| ENSG00000157985 | AGAP1    | -0,71 | 1,55E-08 | 1,15E-06 |
| ENSG00000109917 | ZNF259   | -0,70 | 1,85E-08 | 1,37E-06 |
| ENSG00000138764 | CCNG2    | 0,69  | 1,97E-08 | 1,45E-06 |
| ENSG00000119699 | TGFB3    | 0,85  | 2,02E-08 | 1,48E-06 |
| ENSG00000136010 | ALDH1L2  | -2,02 | 2,06E-08 | 1,50E-06 |
| ENSG00000165868 | HSPA12A  | -1,54 | 2,09E-08 | 1,52E-06 |
| ENSG00000116675 | DNAJC6   | -1,13 | 2,15E-08 | 1,56E-06 |
| ENSG00000177425 | PAWR     | -0,61 | 2,34E-08 | 1,69E-06 |
| ENSG00000120885 | CLU      | 1,30  | 2,36E-08 | 1,70E-06 |
| ENSG00000072041 | SLC6A15  | -1,85 | 2,39E-08 | 1,71E-06 |
| ENSG00000131080 | EDA2R    | -1,34 | 2,46E-08 | 1,75E-06 |
| ENSG00000072110 | ACTN1    | -0,97 | 2,53E-08 | 1,80E-06 |
| ENSG00000142677 | IL22RA1  | -1,47 | 2,59E-08 | 1,83E-06 |
| ENSG00000127589 | TUBBP1   | -0,92 | 2,61E-08 | 1,84E-06 |
| ENSG00000117448 | AKR1A1   | 0,59  | 2,62E-08 | 1,85E-06 |
| ENSG00000164400 | CSF2     | -2,03 | 2,69E-08 | 1,89E-06 |
| ENSG00000072071 | LPHN1    | 0,69  | 2,89E-08 | 2,02E-06 |
| ENSG00000075826 | SEC31B   | 0,95  | 3,13E-08 | 2,18E-06 |
| ENSG00000185100 | ADSSL1   | 1,02  | 3,28E-08 | 2,27E-06 |
| ENSG00000069431 | ABCC9    | 1,82  | 3,35E-08 | 2,32E-06 |
| ENSG00000100968 | NFATC4   | 1,07  | 3,51E-08 | 2,41E-06 |
| ENSG00000135362 | PRR5L    | 0,90  | 3,52E-08 | 2,41E-06 |
| ENSG00000165732 | DDX21    | -0,77 | 3,63E-08 | 2,48E-06 |
| ENSG00000188158 | NHS      | 0,74  | 3,64E-08 | 2,48E-06 |
| ENSG00000121578 | B4GALT4  | 0,60  | 3,84E-08 | 2,61E-06 |
| ENSG00000128422 | KRT17    | -1,83 | 3,88E-08 | 2,63E-06 |
| ENSG00000134215 | VAV3     | 1,07  | 3,97E-08 | 2,68E-06 |
| ENSG00000102038 | SMARCA1  | 0,88  | 4,01E-08 | 2,70E-06 |
| ENSG00000010810 | FYN      | -1,36 | 4,11E-08 | 2,75E-06 |
| ENSG00000196230 | TUBB     | -0,84 | 4,13E-08 | 2,76E-06 |
| ENSG00000112320 | SOBP     | 1,31  | 4,18E-08 | 2,78E-06 |
| ENSG00000140859 | KIFC3    | -1,04 | 4,22E-08 | 2,80E-06 |
| ENSG00000167994 | RAB3IL1  | -2,07 | 4,24E-08 | 2,80E-06 |
| ENSG00000000971 | CFH      | 0,66  | 4,27E-08 | 2,81E-06 |
| ENSG00000148218 | ALAD     | 0,58  | 4,39E-08 | 2,88E-06 |
| ENSG00000100739 | BDKRB1   | 1,67  | 4,41E-08 | 2,88E-06 |
| ENSG00000184564 | SLITRK6  | 0,80  | 4,50E-08 | 2,93E-06 |
| ENSG00000197646 | PDCD1LG2 | -2,00 | 4,72E-08 | 3,07E-06 |
| ENSG00000139496 | NUPL1    | -0,54 | 4,85E-08 | 3,14E-06 |
| ENSG00000198976 | MIR429   | 1,20  | 4,89E-08 | 3,16E-06 |
| ENSG00000198380 | GFPT1    | -0,74 | 4,94E-08 | 3,18E-06 |
| ENSG00000157388 | CACNA1D  | 1,20  | 4,97E-08 | 3,18E-06 |
| ENSG00000048052 | HDAC9    | -1,13 | 5,18E-08 | 3,31E-06 |
| ENSG00000183864 | TOB2     | 0,65  | 5,48E-08 | 3,49E-06 |

|                 |               |       |          |          |
|-----------------|---------------|-------|----------|----------|
| ENSG00000170004 | CHD3          | 0,70  | 5,50E-08 | 3,49E-06 |
| ENSG00000115295 | CLIP4         | -0,67 | 5,68E-08 | 3,57E-06 |
| ENSG00000143367 | TUFT1         | -0,73 | 5,68E-08 | 3,57E-06 |
| ENSG00000203709 | C1orf132      | 0,95  | 5,66E-08 | 3,57E-06 |
| ENSG00000162069 | CCDC64B       | 0,68  | 5,74E-08 | 3,60E-06 |
| ENSG00000205213 | LGR4          | 0,56  | 5,77E-08 | 3,60E-06 |
| ENSG00000041880 | PARP3         | 0,61  | 5,82E-08 | 3,61E-06 |
| ENSG00000113645 | WWC1          | -0,85 | 5,81E-08 | 3,61E-06 |
| ENSG00000130702 | LAMA5         | 0,53  | 5,86E-08 | 3,63E-06 |
| ENSG00000131116 | ZNF428        | 0,58  | 5,93E-08 | 3,64E-06 |
| ENSG00000147324 | MFHAS1        | -1,06 | 5,93E-08 | 3,64E-06 |
| ENSG00000272482 | RP11-474O21.5 | 1,06  | 6,17E-08 | 3,78E-06 |
| ENSG00000173156 | RHOD          | -0,79 | 6,23E-08 | 3,80E-06 |
| ENSG00000084731 | KIF3C         | -1,11 | 6,31E-08 | 3,84E-06 |
| ENSG00000214135 | AC024560.3    | 0,76  | 6,67E-08 | 4,05E-06 |
| ENSG00000167996 | FTH1          | -0,93 | 6,70E-08 | 4,05E-06 |
| ENSG00000115461 | IGFBP5        | 1,26  | 7,16E-08 | 4,32E-06 |
| ENSG00000108352 | RAPGEFL1      | 1,39  | 7,72E-08 | 4,64E-06 |
| ENSG00000081181 | ARG2          | -1,61 | 7,89E-08 | 4,73E-06 |
| ENSG00000134363 | FST           | -1,52 | 8,10E-08 | 4,84E-06 |
| ENSG00000124370 | MCEE          | 0,94  | 8,14E-08 | 4,85E-06 |
| ENSG00000130513 | GDF15         | -1,09 | 8,78E-08 | 5,20E-06 |
| ENSG00000230551 | CTB-89H12.4   | 0,69  | 8,79E-08 | 5,20E-06 |
| ENSG00000113657 | DPYSL3        | 1,21  | 8,90E-08 | 5,25E-06 |
| ENSG00000162576 | MXRA8         | -2,02 | 9,17E-08 | 5,39E-06 |
| ENSG00000178188 | SH2B1         | 0,63  | 9,19E-08 | 5,39E-06 |
| ENSG00000122786 | CALD1         | -1,54 | 9,76E-08 | 5,71E-06 |
| ENSG00000212694 | AC084018.1    | 0,81  | 9,87E-08 | 5,76E-06 |
| ENSG00000083857 | FAT1          | -0,57 | 1,02E-07 | 5,93E-06 |
| ENSG00000105327 | BBC3          | -1,27 | 1,02E-07 | 5,94E-06 |
| ENSG00000183696 | UPP1          | -1,34 | 1,03E-07 | 5,94E-06 |
| ENSG00000186185 | KIF18B        | 1,40  | 1,03E-07 | 5,94E-06 |
| ENSG00000196305 | IARS          | -0,84 | 1,05E-07 | 6,05E-06 |
| ENSG00000130649 | CYP2E1        | 1,23  | 1,17E-07 | 6,70E-06 |
| ENSG00000144935 | TRPC1         | 0,92  | 1,21E-07 | 6,91E-06 |
| ENSG00000162664 | ZNF326        | 0,56  | 1,24E-07 | 7,09E-06 |
| ENSG00000101384 | JAG1          | -1,16 | 1,29E-07 | 7,35E-06 |
| ENSG00000168447 | SCNN1B        | 0,91  | 1,35E-07 | 7,64E-06 |
| ENSG00000089356 | FXYD3         | 0,91  | 1,38E-07 | 7,77E-06 |
| ENSG00000130775 | THEMIS2       | -1,73 | 1,42E-07 | 8,00E-06 |
| ENSG00000049323 | LTBP1         | -1,54 | 1,45E-07 | 8,16E-06 |
| ENSG00000074527 | NTN4          | -0,69 | 1,46E-07 | 8,16E-06 |
| ENSG00000100345 | MYH9          | -0,85 | 1,47E-07 | 8,23E-06 |
| ENSG00000182199 | SHMT2         | -0,97 | 1,49E-07 | 8,31E-06 |



|                 |              |       |          |          |
|-----------------|--------------|-------|----------|----------|
| ENSG00000035862 | TIMP2        | -0,78 | 1,50E-07 | 8,32E-06 |
| ENSG00000249601 | CTB-27N1.1   | 1,97  | 1,52E-07 | 8,43E-06 |
| ENSG00000104635 | SLC39A14     | -1,28 | 1,56E-07 | 8,60E-06 |
| ENSG00000144655 | CSRNP1       | -0,84 | 1,61E-07 | 8,87E-06 |
| ENSG00000188064 | WNT7B        | 0,72  | 1,69E-07 | 9,29E-06 |
| ENSG00000147883 | CDKN2B       | -1,34 | 1,70E-07 | 9,29E-06 |
| ENSG00000167173 | C15orf39     | -0,79 | 1,72E-07 | 9,38E-06 |
| ENSG00000196628 | TCF4         | 0,78  | 1,73E-07 | 9,42E-06 |
| ENSG00000112149 | CD83         | -1,85 | 1,77E-07 | 9,63E-06 |
| ENSG00000168575 | SLC20A2      | -0,77 | 1,79E-07 | 9,69E-06 |
| ENSG00000148468 | FAM171A1     | -0,79 | 2,09E-07 | 1,13E-05 |
| ENSG00000105518 | TMEM205      | 0,81  | 2,10E-07 | 1,13E-05 |
| ENSG00000065357 | DGKA         | 0,90  | 2,13E-07 | 1,14E-05 |
| ENSG00000113161 | HMGCR        | -0,61 | 2,18E-07 | 1,16E-05 |
| ENSG00000165799 | RNASE7       | -1,38 | 2,18E-07 | 1,16E-05 |
| ENSG00000128268 | MGAT3        | 1,17  | 2,33E-07 | 1,24E-05 |
| ENSG00000064687 | ABCA7        | 0,70  | 2,41E-07 | 1,27E-05 |
| ENSG00000140941 | MAP1LC3B     | -0,82 | 2,40E-07 | 1,27E-05 |
| ENSG00000179546 | HTR1D        | -1,95 | 2,50E-07 | 1,32E-05 |
| ENSG00000068137 | PLEKHH3      | 0,86  | 2,71E-07 | 1,43E-05 |
| ENSG00000172638 | EFEMP2       | 0,96  | 2,75E-07 | 1,45E-05 |
| ENSG00000111859 | NEDD9        | -1,42 | 2,94E-07 | 1,54E-05 |
| ENSG00000104549 | SQLE         | -0,87 | 2,96E-07 | 1,55E-05 |
| ENSG00000113108 | APBB3        | 0,71  | 3,00E-07 | 1,56E-05 |
| ENSG00000138606 | SHF          | 1,37  | 3,04E-07 | 1,58E-05 |
| ENSG00000169174 | PCSK9        | -1,34 | 3,11E-07 | 1,61E-05 |
| ENSG00000237807 | RP11-400K9.4 | 0,73  | 3,12E-07 | 1,61E-05 |
| ENSG00000122641 | INHBA        | -1,80 | 3,16E-07 | 1,63E-05 |
| ENSG00000123213 | NLN          | -0,73 | 3,20E-07 | 1,65E-05 |
| ENSG00000101335 | MYL9         | -1,79 | 3,26E-07 | 1,67E-05 |
| ENSG00000109452 | INPP4B       | -0,78 | 3,37E-07 | 1,72E-05 |
| ENSG00000019549 | SNAI2        | -1,32 | 3,39E-07 | 1,73E-05 |
| ENSG00000101670 | LIPG         | -1,57 | 3,41E-07 | 1,73E-05 |
| ENSG00000147383 | NSDHL        | -0,70 | 3,40E-07 | 1,73E-05 |
| ENSG00000182796 | TMEM198B     | 0,79  | 3,46E-07 | 1,75E-05 |
| ENSG00000162614 | NEXN         | -1,81 | 3,64E-07 | 1,83E-05 |
| ENSG00000131127 | ZNF141       | 0,77  | 3,88E-07 | 1,95E-05 |
| ENSG00000134398 | ERN2         | 0,89  | 3,88E-07 | 1,95E-05 |
| ENSG00000119938 | PPP1R3C      | 1,52  | 3,94E-07 | 1,97E-05 |
| ENSG00000128655 | PDE11A       | 1,55  | 3,96E-07 | 1,98E-05 |
| ENSG00000109790 | KLHL5        | -0,75 | 4,13E-07 | 2,05E-05 |
| ENSG00000168994 | PXDC1        | -1,05 | 4,13E-07 | 2,05E-05 |
| ENSG00000095951 | HIVEP1       | -0,90 | 4,30E-07 | 2,12E-05 |
| ENSG00000155066 | PROM2        | 0,66  | 4,29E-07 | 2,12E-05 |

|                 |                |       |          |          |
|-----------------|----------------|-------|----------|----------|
| ENSG00000174093 | RP11-1407O15.2 | 0,67  | 4,29E-07 | 2,12E-05 |
| ENSG00000139926 | FRMD6          | -1,06 | 4,38E-07 | 2,15E-05 |
| ENSG00000169660 | HEXDC          | 0,72  | 4,43E-07 | 2,17E-05 |
| ENSG00000047849 | MAP4           | -0,81 | 4,47E-07 | 2,19E-05 |
| ENSG00000105855 | ITGB8          | -0,54 | 4,66E-07 | 2,25E-05 |
| ENSG00000185442 | FAM174B        | 0,70  | 4,63E-07 | 2,25E-05 |
| ENSG00000186517 | ARHGAP30       | -1,19 | 4,66E-07 | 2,25E-05 |
| ENSG00000249242 | TMEM150C       | 0,92  | 4,63E-07 | 2,25E-05 |
| ENSG00000269962 | RP13-238F13.5  | -1,85 | 4,65E-07 | 2,25E-05 |
| ENSG00000204362 | RP11-380J14.1  | 1,49  | 4,85E-07 | 2,34E-05 |
| ENSG00000257621 | RP11-349A22.5  | 0,55  | 4,86E-07 | 2,34E-05 |
| ENSG00000131050 | BPIFA2         | 1,10  | 4,88E-07 | 2,34E-05 |
| ENSG00000003756 | RBM5           | 0,58  | 4,91E-07 | 2,35E-05 |
| ENSG00000108551 | RASD1          | -1,87 | 5,10E-07 | 2,43E-05 |
| ENSG00000198189 | HSD17B11       | 0,82  | 5,30E-07 | 2,52E-05 |
| ENSG00000112079 | STK38          | 0,57  | 5,37E-07 | 2,55E-05 |
| ENSG00000152463 | OLAH           | -1,83 | 5,40E-07 | 2,56E-05 |
| ENSG00000155304 | HSPA13         | -0,63 | 5,74E-07 | 2,71E-05 |
| ENSG00000249087 | C1orf213       | 1,33  | 5,74E-07 | 2,71E-05 |
| ENSG00000116985 | BMP8B          | -1,41 | 6,10E-07 | 2,87E-05 |
| ENSG00000198142 | SOWAHC         | -0,92 | 6,16E-07 | 2,89E-05 |
| ENSG00000135960 | EDAR           | 1,64  | 6,25E-07 | 2,92E-05 |
| ENSG00000113504 | SLC12A7        | -0,66 | 6,36E-07 | 2,97E-05 |
| ENSG00000185963 | BICD2          | -0,56 | 6,45E-07 | 3,01E-05 |
| ENSG00000225950 | NTF4           | 0,90  | 6,51E-07 | 3,02E-05 |
| ENSG00000166833 | NAV2           | -0,90 | 6,57E-07 | 3,05E-05 |
| ENSG00000134030 | CTIF           | -0,62 | 6,71E-07 | 3,10E-05 |
| ENSG00000158014 | SLC30A2        | -1,81 | 6,92E-07 | 3,19E-05 |
| ENSG00000176444 | CLK2           | 0,62  | 7,00E-07 | 3,22E-05 |
| ENSG00000129116 | PALLD          | -0,77 | 7,23E-07 | 3,32E-05 |
| ENSG00000147526 | TACC1          | -0,61 | 7,47E-07 | 3,42E-05 |
| ENSG00000159167 | STC1           | 1,56  | 7,48E-07 | 3,42E-05 |
| ENSG00000100650 | SRSF5          | 0,59  | 7,53E-07 | 3,43E-05 |
| ENSG00000101665 | SMAD7          | -1,42 | 7,70E-07 | 3,50E-05 |
| ENSG00000141458 | NPC1           | -0,87 | 7,89E-07 | 3,58E-05 |
| ENSG00000169504 | CLIC4          | -1,13 | 7,95E-07 | 3,60E-05 |
| ENSG00000100201 | DDX17          | 0,54  | 8,04E-07 | 3,63E-05 |
| ENSG00000179361 | ARID3B         | -1,02 | 8,32E-07 | 3,75E-05 |
| ENSG00000010322 | NISCH          | 0,50  | 8,56E-07 | 3,84E-05 |
| ENSG00000186577 | C6orf1         | -0,95 | 8,55E-07 | 3,84E-05 |
| ENSG00000167767 | KRT80          | -1,70 | 8,65E-07 | 3,85E-05 |
| ENSG00000205978 | NYNRIN         | 0,76  | 8,63E-07 | 3,85E-05 |
| ENSG00000213281 | NRAS           | -0,55 | 8,64E-07 | 3,85E-05 |
| ENSG00000139278 | GLIPR1         | -1,68 | 8,75E-07 | 3,89E-05 |

|                 |               |       |          |          |
|-----------------|---------------|-------|----------|----------|
| ENSG00000184481 | FOXO4         | 0,58  | 8,86E-07 | 3,93E-05 |
| ENSG00000129270 | MMP28         | 1,16  | 9,15E-07 | 4,05E-05 |
| ENSG00000175938 | Orai3         | 0,91  | 9,20E-07 | 4,06E-05 |
| ENSG00000184908 | CLCNKB        | 1,85  | 9,40E-07 | 4,14E-05 |
| ENSG00000185219 | ZNF445        | 0,61  | 9,44E-07 | 4,15E-05 |
| ENSG00000173210 | ABLIM3        | -0,69 | 9,53E-07 | 4,18E-05 |
| ENSG00000185946 | RNPC3         | 0,76  | 9,66E-07 | 4,23E-05 |
| ENSG00000146232 | NFKBIE        | -0,75 | 1,04E-06 | 4,52E-05 |
| ENSG00000070731 | ST6GALNAC2    | 0,51  | 1,05E-06 | 4,57E-05 |
| ENSG00000148841 | ITPRIP        | -0,99 | 1,08E-06 | 4,70E-05 |
| ENSG00000157625 | TAB3          | -0,60 | 1,09E-06 | 4,73E-05 |
| ENSG00000175832 | ETV4          | -1,21 | 1,10E-06 | 4,74E-05 |
| ENSG00000207864 | MIR27B        | 1,41  | 1,11E-06 | 4,80E-05 |
| ENSG00000232931 | LINC00342     | 0,79  | 1,11E-06 | 4,80E-05 |
| ENSG00000130304 | SLC27A1       | 0,72  | 1,13E-06 | 4,86E-05 |
| ENSG00000115828 | QPCT          | -1,19 | 1,14E-06 | 4,87E-05 |
| ENSG00000090006 | LTBP4         | 0,85  | 1,14E-06 | 4,87E-05 |
| ENSG00000136156 | ITM2B         | 0,49  | 1,16E-06 | 4,97E-05 |
| ENSG00000166073 | GPR176        | -1,64 | 1,19E-06 | 5,05E-05 |
| ENSG00000167106 | FAM102A       | -0,62 | 1,19E-06 | 5,05E-05 |
| ENSG00000197860 | SGTB          | -1,29 | 1,19E-06 | 5,05E-05 |
| ENSG00000169093 | ASMTL         | 0,75  | 1,19E-06 | 5,05E-05 |
| ENSG00000139318 | DUSP6         | -1,14 | 1,22E-06 | 5,13E-05 |
| ENSG00000149212 | SESN3         | 0,78  | 1,23E-06 | 5,17E-05 |
| ENSG00000188206 | HNRNPU-AS1    | 0,94  | 1,24E-06 | 5,21E-05 |
| ENSG00000108292 | MLLT6         | 0,51  | 1,25E-06 | 5,26E-05 |
| ENSG00000247828 | TMEM161B-AS1  | 0,77  | 1,28E-06 | 5,36E-05 |
| ENSG00000138685 | FGF2          | -1,81 | 1,31E-06 | 5,45E-05 |
| ENSG00000123405 | NFE2          | 1,67  | 1,31E-06 | 5,47E-05 |
| ENSG00000172794 | RAB37         | 1,07  | 1,34E-06 | 5,57E-05 |
| ENSG00000213865 | C8orf44       | 0,96  | 1,35E-06 | 5,59E-05 |
| ENSG00000113369 | ARRDC3        | 0,80  | 1,39E-06 | 5,76E-05 |
| ENSG00000163406 | SLC15A2       | 0,82  | 1,42E-06 | 5,86E-05 |
| ENSG00000176170 | SPHK1         | -1,50 | 1,42E-06 | 5,86E-05 |
| ENSG00000251323 | RP11-452H21.4 | -1,61 | 1,43E-06 | 5,87E-05 |
| ENSG00000154764 | WNT7A         | -1,15 | 1,51E-06 | 6,19E-05 |
| ENSG00000226564 | FTH1P20       | -0,96 | 1,51E-06 | 6,20E-05 |
| ENSG00000139211 | AMIGO2        | -1,60 | 1,53E-06 | 6,25E-05 |
| ENSG00000234456 | MAGI2-AS3     | -0,86 | 1,54E-06 | 6,28E-05 |
| ENSG00000101210 | EEF1A2        | -1,70 | 1,55E-06 | 6,32E-05 |
| ENSG00000129682 | FGF13         | -1,66 | 1,56E-06 | 6,32E-05 |
| ENSG00000128692 | EIF2S2P4      | -0,56 | 1,66E-06 | 6,72E-05 |
| ENSG00000169035 | KLK7          | 1,55  | 1,67E-06 | 6,75E-05 |
| ENSG00000125885 | MCM8          | 0,68  | 1,67E-06 | 6,76E-05 |

|                 |            |       |          |             |
|-----------------|------------|-------|----------|-------------|
| ENSG00000115009 | CCL20      | -1,60 | 1,68E-06 | 6,77E-05    |
| ENSG00000104856 | RELB       | -1,03 | 1,69E-06 | 6,79E-05    |
| ENSG00000172432 | GTPBP2     | -0,69 | 1,71E-06 | 6,85E-05    |
| ENSG00000136002 | ARHGEF4    | -0,94 | 1,73E-06 | 6,91E-05    |
| ENSG00000168077 | SCARA3     | 1,00  | 1,74E-06 | 6,95E-05    |
| ENSG00000134684 | YARS       | -0,67 | 1,75E-06 | 6,98E-05    |
| ENSG00000175309 | PHYKPL     | 0,54  | 1,76E-06 | 6,99E-05    |
| ENSG00000166126 | AMN        | 1,01  | 1,77E-06 | 7,01E-05    |
| ENSG00000196449 | YRDC       | -0,91 | 1,85E-06 | 7,34E-05    |
| ENSG00000110092 | CCND1      | -1,22 | 1,88E-06 | 7,42E-05    |
| ENSG00000136867 | SLC31A2    | -0,85 | 1,91E-06 | 7,53E-05    |
| ENSG00000107130 | NCS1       | -0,65 | 1,97E-06 | 7,76E-05    |
| ENSG00000132424 | PNISR      | 0,57  | 1,97E-06 | 7,76E-05    |
| ENSG00000168269 | FOXI1      | 1,78  | 2,02E-06 | 7,92E-05    |
| ENSG00000120889 | TNFRSF10B  | -0,64 | 2,06E-06 | 8,05E-05    |
| ENSG00000266658 | RNA28S5    | -1,38 | 2,07E-06 | 8,11E-05    |
| ENSG00000102287 | GABRE      | 1,01  | 2,12E-06 | 8,24E-05    |
| ENSG00000127528 | KLF2       | -1,69 | 2,12E-06 | 8,24E-05    |
| ENSG00000050165 | DKK3       | -1,58 | 2,13E-06 | 8,25E-05    |
| ENSG00000174233 | ADCY6      | 0,64  | 2,13E-06 | 8,25E-05    |
| ENSG00000181690 | PLAG1      | 0,61  | 2,13E-06 | 8,25E-05    |
| ENSG00000110218 | PANX1      | -0,67 | 2,19E-06 | 8,45E-05    |
| ENSG00000177519 | RPRM       | 1,26  | 2,22E-06 | 8,55E-05    |
| ENSG00000115641 | FHL2       | -0,89 | 2,24E-06 | 8,63E-05    |
| ENSG00000139998 | RAB15      | 1,10  | 2,27E-06 | 8,70E-05    |
| ENSG00000134278 | SPIRE1     | -1,12 | 2,39E-06 | 9,16E-05    |
| ENSG00000049246 | PER3       | 0,96  | 2,48E-06 | 9,49E-05    |
| ENSG00000071242 | RPS6KA2    | -0,49 | 2,54E-06 | 9,71E-05    |
| ENSG00000116786 | PLEKHM2    | -0,58 | 2,58E-06 | 9,80E-05    |
| ENSG00000167280 | ENGASE     | 0,79  | 2,58E-06 | 9,80E-05    |
| ENSG00000188906 | LRRK2      | 0,88  | 2,62E-06 | 9,95E-05    |
| ENSG00000143515 | ATP8B2     | -1,00 | 2,65E-06 | 0,000100325 |
| ENSG00000203632 | AC007690.1 | 1,55  | 2,67E-06 | 0,000100813 |
| ENSG00000180370 | PAK2       | -0,44 | 2,68E-06 | 0,000101084 |
| ENSG00000166965 | RCCD1      | 0,59  | 2,80E-06 | 0,000105509 |
| ENSG00000134569 | LRP4       | 0,76  | 2,82E-06 | 0,000105708 |
| ENSG00000154122 | ANKH       | 1,00  | 2,81E-06 | 0,000105708 |
| ENSG00000185522 | C11orf35   | 0,98  | 2,84E-06 | 0,000106104 |
| ENSG00000054690 | PLEKHH1    | 0,50  | 2,87E-06 | 0,00010706  |
| ENSG00000140450 | ARRDC4     | 0,99  | 2,87E-06 | 0,00010706  |
| ENSG00000169991 | IFFO2      | -1,07 | 2,88E-06 | 0,00010706  |
| ENSG00000137288 | UQCC2      | 0,70  | 2,91E-06 | 0,000108236 |
| ENSG00000120129 | DUSP1      | -0,76 | 2,93E-06 | 0,000108512 |
| ENSG00000196136 | SERPINA3   | -1,51 | 3,01E-06 | 0,000111201 |

|                 |              |       |          |             |
|-----------------|--------------|-------|----------|-------------|
| ENSG00000112531 | QKI          | -0,56 | 3,03E-06 | 0,000111829 |
| ENSG00000196605 | ZNF846       | 0,79  | 3,09E-06 | 0,00011393  |
| ENSG00000198625 | MDM4         | 0,63  | 3,11E-06 | 0,000114407 |
| ENSG00000112245 | PTP4A1       | -0,58 | 3,19E-06 | 0,000117204 |
| ENSG00000082014 | SMARCD3      | 0,77  | 3,25E-06 | 0,00011875  |
| ENSG00000146592 | CREB5        | -1,67 | 3,25E-06 | 0,00011875  |
| ENSG00000166123 | GPT2         | -0,61 | 3,24E-06 | 0,00011875  |
| ENSG00000138758 | sep-11       | -0,85 | 3,27E-06 | 0,000118926 |
| ENSG00000178038 | ALS2CL       | 0,71  | 3,27E-06 | 0,000118926 |
| ENSG00000173535 | TNFRSF10C    | -0,93 | 3,36E-06 | 0,000121874 |
| ENSG00000054277 | OPN3         | -1,01 | 3,40E-06 | 0,00012281  |
| ENSG00000068745 | IP6K2        | 0,45  | 3,39E-06 | 0,00012281  |
| ENSG00000168398 | BDKRB2       | 0,82  | 3,41E-06 | 0,000123181 |
| ENSG00000107771 | CCSER2       | -0,63 | 3,44E-06 | 0,000123943 |
| ENSG00000184381 | PLA2G6       | 0,83  | 3,47E-06 | 0,000124813 |
| ENSG00000144810 | COL8A1       | 1,39  | 3,50E-06 | 0,000125561 |
| ENSG00000116977 | LGALS8       | 0,63  | 3,52E-06 | 0,000126084 |
| ENSG00000067167 | TRAM1        | -0,94 | 3,56E-06 | 0,000127459 |
| ENSG00000162366 | PDZK1IP1     | -1,44 | 3,57E-06 | 0,000127646 |
| ENSG00000105662 | CRTC1        | 0,59  | 3,58E-06 | 0,000127771 |
| ENSG00000147274 | RBMX         | 0,62  | 3,62E-06 | 0,000128924 |
| ENSG00000145020 | AMT          | 0,70  | 3,64E-06 | 0,000129397 |
| ENSG00000102962 | CCL22        | -1,62 | 3,68E-06 | 0,000130366 |
| ENSG00000129083 | COPB1        | -0,59 | 3,68E-06 | 0,000130366 |
| ENSG00000123908 | AGO2         | -0,66 | 3,74E-06 | 0,000132241 |
| ENSG00000112033 | PPARD        | -0,74 | 3,77E-06 | 0,000132806 |
| ENSG00000162591 | MEGF6        | 0,81  | 3,81E-06 | 0,0001339   |
| ENSG00000069493 | CLEC2D       | 0,94  | 3,82E-06 | 0,000134215 |
| ENSG00000223705 | NSUN5P1      | 0,69  | 3,92E-06 | 0,000137524 |
| ENSG00000116016 | EPAS1        | 0,86  | 4,03E-06 | 0,000141172 |
| ENSG00000242252 | BGLAP        | 1,67  | 4,11E-06 | 0,000143485 |
| ENSG00000131016 | AKAP12       | -1,40 | 4,13E-06 | 0,000143862 |
| ENSG00000124225 | PMEPA1       | -1,49 | 4,21E-06 | 0,000146547 |
| ENSG00000151651 | ADAM8        | -1,03 | 4,26E-06 | 0,000147784 |
| ENSG00000173209 | AHSA2        | 0,57  | 4,26E-06 | 0,000147784 |
| ENSG00000144136 | SLC20A1      | -0,63 | 4,29E-06 | 0,00014853  |
| ENSG00000136059 | VILL         | 0,80  | 4,34E-06 | 0,000149864 |
| ENSG00000163577 | EIF5A2       | -1,04 | 4,37E-06 | 0,000150431 |
| ENSG00000272666 | CTA-384D8.35 | -1,73 | 4,36E-06 | 0,000150431 |
| ENSG00000272168 | CASC15       | -1,48 | 4,49E-06 | 0,000154532 |
| ENSG00000134668 | SPOCD1       | -1,54 | 4,51E-06 | 0,000154797 |
| ENSG00000183779 | ZNF703       | 0,56  | 4,79E-06 | 0,000164158 |
| ENSG00000071537 | SEL1L        | -0,63 | 4,83E-06 | 0,000165092 |
| ENSG00000115306 | SPTBN1       | -0,60 | 4,90E-06 | 0,000167124 |

|                 |               |       |          |             |
|-----------------|---------------|-------|----------|-------------|
| ENSG00000179403 | VWA1          | 0,58  | 4,90E-06 | 0,000167124 |
| ENSG00000213983 | AP1G2         | 0,51  | 4,96E-06 | 0,00016863  |
| ENSG00000254343 | RP11-760H22.2 | 1,22  | 5,06E-06 | 0,00017175  |
| ENSG00000067836 | ROGDI         | 0,62  | 5,20E-06 | 0,000176086 |
| ENSG00000178996 | SNX18         | -0,57 | 5,20E-06 | 0,000176086 |
| ENSG00000170899 | GSTA4         | 1,08  | 5,31E-06 | 0,00017929  |
| ENSG00000171163 | ZNF692        | 0,64  | 5,36E-06 | 0,000180906 |
| ENSG00000117228 | GBP1          | -1,01 | 5,41E-06 | 0,000181949 |
| ENSG00000165195 | PIGA          | -0,75 | 5,41E-06 | 0,000181949 |
| ENSG00000145040 | UCN2          | -1,48 | 5,43E-06 | 0,000182098 |
| ENSG00000242028 | HYPK          | 1,09  | 5,51E-06 | 0,000184559 |
| ENSG00000203727 | SAMD5         | -1,64 | 5,54E-06 | 0,000185267 |
| ENSG00000197279 | ZNF165        | -0,77 | 5,56E-06 | 0,000185648 |
| ENSG00000176907 | C8orf4        | -1,23 | 5,58E-06 | 0,000185994 |
| ENSG00000091039 | OSBPL8        | -0,47 | 5,76E-06 | 0,000190724 |
| ENSG00000104880 | ARHGEF18      | -0,59 | 5,75E-06 | 0,000190724 |
| ENSG00000173334 | TRIB1         | -0,75 | 5,74E-06 | 0,000190724 |
| ENSG00000181449 | SOX2          | 0,91  | 5,76E-06 | 0,000190724 |
| ENSG00000196182 | STK40         | -0,48 | 5,80E-06 | 0,000191574 |
| ENSG00000243989 | ACY1          | 0,91  | 5,81E-06 | 0,000191655 |
| ENSG00000116584 | ARHGEF2       | -0,48 | 5,90E-06 | 0,000194108 |
| ENSG00000085662 | AKR1B1        | -0,77 | 5,95E-06 | 0,000195407 |
| ENSG00000149428 | HYOU1         | -0,70 | 5,96E-06 | 0,000195407 |
| ENSG00000141449 | GREB1L        | -1,19 | 6,07E-06 | 0,000198359 |
| ENSG00000144635 | DYNC1LI1      | -0,53 | 6,06E-06 | 0,000198359 |
| ENSG00000268852 | AC132872.2    | -1,71 | 6,10E-06 | 0,000199248 |
| ENSG00000115310 | RTN4          | -0,57 | 6,20E-06 | 0,000201985 |
| ENSG00000157168 | NRG1          | -1,16 | 6,24E-06 | 0,000203114 |
| ENSG00000140743 | CDR2          | -0,79 | 6,30E-06 | 0,00020468  |
| ENSG00000153246 | PLA2R1        | 0,94  | 6,36E-06 | 0,000206319 |
| ENSG00000140416 | TPM1          | -1,45 | 6,38E-06 | 0,000206459 |
| ENSG00000153885 | KCTD15        | -1,18 | 6,42E-06 | 0,000207069 |
| ENSG00000266777 | SH3GL1P1      | 1,04  | 6,41E-06 | 0,000207069 |
| ENSG00000198105 | ZNF248        | 0,69  | 6,54E-06 | 0,000210828 |
| ENSG00000100284 | TOM1          | -0,48 | 6,68E-06 | 0,000214945 |
| ENSG00000130822 | PNCK          | 1,47  | 6,71E-06 | 0,000215491 |
| ENSG00000255400 | RP13-631K18.5 | -1,66 | 6,72E-06 | 0,000215491 |
| ENSG00000219507 | FTH1P8        | -0,89 | 6,77E-06 | 0,000216688 |
| ENSG00000111817 | DSE           | -0,54 | 6,85E-06 | 0,000218892 |
| ENSG00000116478 | HDAC1         | 0,46  | 6,89E-06 | 0,000219781 |
| ENSG00000188175 | HEPACAM2      | 1,70  | 6,95E-06 | 0,000221213 |
| ENSG00000169592 | INO80E        | 0,57  | 7,00E-06 | 0,000222667 |
| ENSG00000103335 | PIEZO1        | -1,03 | 7,05E-06 | 0,000223768 |
| ENSG00000135821 | GLUL          | 0,72  | 7,06E-06 | 0,000223768 |

|                 |               |       |          |             |
|-----------------|---------------|-------|----------|-------------|
| ENSG00000141582 | CBX4          | -0,79 | 7,10E-06 | 0,000224651 |
| ENSG00000173281 | PPP1R3B       | -0,79 | 7,41E-06 | 0,000233904 |
| ENSG00000214185 | XPOTP1        | -0,97 | 7,43E-06 | 0,000234203 |
| ENSG00000260953 | RP11-426C22.6 | -1,68 | 7,48E-06 | 0,000235615 |
| ENSG00000111371 | SLC38A1       | -0,94 | 7,51E-06 | 0,000236071 |
| ENSG00000205403 | CFI           | 0,81  | 7,62E-06 | 0,000239029 |
| ENSG00000182168 | UNC5C         | 1,62  | 7,63E-06 | 0,000239131 |
| ENSG00000172893 | DHCR7         | -0,76 | 7,66E-06 | 0,000239706 |
| ENSG00000124215 | CDH26         | 0,94  | 7,78E-06 | 0,000242953 |
| ENSG00000151014 | CCRN4L        | -1,16 | 7,79E-06 | 0,000242953 |
| ENSG00000216775 | RP1-152L7.5   | 1,14  | 7,93E-06 | 0,00024691  |
| ENSG00000143013 | LMO4          | 0,62  | 8,01E-06 | 0,000248839 |
| ENSG00000127399 | LRRC61        | -0,83 | 8,07E-06 | 0,000250388 |
| ENSG00000237441 | RGL2          | 0,64  | 8,15E-06 | 0,000252361 |
| ENSG00000109758 | HGFAC         | -1,68 | 8,18E-06 | 0,000253076 |
| ENSG00000064655 | EYA2          | 0,56  | 8,28E-06 | 0,000255794 |
| ENSG00000169045 | HNRNP1        | 0,60  | 8,32E-06 | 0,000256416 |
| ENSG00000100426 | ZBED4         | -0,47 | 8,44E-06 | 0,000259315 |
| ENSG00000166986 | MARS          | -0,64 | 8,43E-06 | 0,000259315 |
| ENSG00000204287 | HLA-DRA       | -1,00 | 8,69E-06 | 0,000266692 |
| ENSG00000132780 | NASP          | 0,57  | 8,72E-06 | 0,000267074 |
| ENSG00000186529 | CYP4F3        | 1,16  | 9,05E-06 | 0,00027638  |
| ENSG00000186918 | ZNF395        | 0,64  | 9,05E-06 | 0,00027638  |
| ENSG00000135473 | PAN2          | 0,67  | 9,19E-06 | 0,000280346 |
| ENSG00000164125 | FAM198B       | -1,15 | 9,27E-06 | 0,000282098 |
| ENSG00000141682 | PMAIP1        | -0,96 | 9,40E-06 | 0,000285679 |
| ENSG00000183856 | IQGAP3        | 1,15  | 9,46E-06 | 0,00028726  |
| ENSG00000104067 | TJP1          | -0,50 | 9,63E-06 | 0,000291931 |
| ENSG00000115875 | SRSF7         | 0,44  | 9,85E-06 | 0,000297949 |
| ENSG00000117114 | LPHN2         | 0,66  | 9,91E-06 | 0,000299278 |
| ENSG00000137504 | CREBZF        | 0,52  | 1,02E-05 | 0,000308389 |
| ENSG00000089280 | FUS           | 0,53  | 1,02E-05 | 0,00030853  |
| ENSG00000180011 | ZADH2         | 0,56  | 1,03E-05 | 0,000309599 |
| ENSG00000244560 | RP4-800G7.2   | 0,89  | 1,03E-05 | 0,000309599 |
| ENSG00000100100 | PIK3IP1       | 0,58  | 1,04E-05 | 0,000310425 |
| ENSG00000092529 | CAPN3         | 0,83  | 1,04E-05 | 0,000312033 |
| ENSG00000204231 | RXRB          | 0,46  | 1,04E-05 | 0,000312223 |
| ENSG00000227184 | EPPK1         | -1,16 | 1,05E-05 | 0,000312928 |
| ENSG00000072682 | P4HA2         | -0,91 | 1,05E-05 | 0,000313645 |
| ENSG00000087128 | TMPRSS11E     | 1,55  | 1,07E-05 | 0,000319028 |
| ENSG00000065361 | ERBB3         | 0,52  | 1,07E-05 | 0,000319038 |
| ENSG00000270049 | RP11-297D21.4 | 1,26  | 1,08E-05 | 0,000320632 |
| ENSG00000262160 | RP11-96D1.11  | 0,67  | 1,10E-05 | 0,000324669 |
| ENSG00000117984 | CTSD          | 0,61  | 1,11E-05 | 0,00032816  |

|                 |            |       |          |             |
|-----------------|------------|-------|----------|-------------|
| ENSG00000182179 | UBA7       | 0,61  | 1,11E-05 | 0,00032816  |
| ENSG00000143416 | SELENBP1   | 0,84  | 1,11E-05 | 0,000328164 |
| ENSG00000113013 | HSPA9      | -0,70 | 1,12E-05 | 0,000329302 |
| ENSG00000146904 | EPHA1      | 0,60  | 1,13E-05 | 0,000331119 |
| ENSG00000131037 | EPS8L1     | 0,49  | 1,14E-05 | 0,000333674 |
| ENSG00000132326 | PER2       | 0,54  | 1,15E-05 | 0,000336131 |
| ENSG00000121895 | TMEM156    | -1,29 | 1,15E-05 | 0,0003368   |
| ENSG00000207611 | MIR149     | 1,26  | 1,16E-05 | 0,000338029 |
| ENSG00000172819 | RARG       | 0,63  | 1,19E-05 | 0,000346454 |
| ENSG00000176225 | RTTN       | -0,73 | 1,20E-05 | 0,000348512 |
| ENSG00000020577 | SAMD4A     | -0,84 | 1,21E-05 | 0,000351214 |
| ENSG00000171608 | PIK3CD     | -0,74 | 1,22E-05 | 0,000354282 |
| ENSG00000162734 | PEA15      | -0,82 | 1,22E-05 | 0,000354851 |
| ENSG00000171223 | JUNB       | -1,07 | 1,27E-05 | 0,000368251 |
| ENSG00000147065 | MSN        | -1,02 | 1,28E-05 | 0,000371026 |
| ENSG00000113407 | TARS       | -0,64 | 1,29E-05 | 0,000372458 |
| ENSG00000128487 | SPECC1     | -0,64 | 1,29E-05 | 0,000372458 |
| ENSG00000172795 | DCP2       | 0,49  | 1,29E-05 | 0,000372458 |
| ENSG00000197905 | TEAD4      | -1,14 | 1,30E-05 | 0,000373003 |
| ENSG00000071127 | WDR1       | -0,49 | 1,31E-05 | 0,000375847 |
| ENSG00000175274 | TP53I11    | 0,82  | 1,31E-05 | 0,000376165 |
| ENSG00000115919 | KYNU       | -1,20 | 1,32E-05 | 0,000378412 |
| ENSG00000004534 | RBM6       | 0,51  | 1,34E-05 | 0,000381533 |
| ENSG00000159176 | CSRP1      | -0,90 | 1,34E-05 | 0,000383285 |
| ENSG00000154277 | UCHL1      | -1,32 | 1,35E-05 | 0,000384029 |
| ENSG00000178209 | PLEC       | -0,50 | 1,35E-05 | 0,000384915 |
| ENSG00000130720 | FIBCD1     | -1,48 | 1,38E-05 | 0,000390746 |
| ENSG00000197081 | IGF2R      | -0,75 | 1,38E-05 | 0,000390746 |
| ENSG00000269959 | SPACA6P-AS | 1,64  | 1,38E-05 | 0,000390746 |
| ENSG00000113231 | PDE8B      | 1,12  | 1,39E-05 | 0,00039213  |
| ENSG00000176845 | METRNL     | -0,80 | 1,40E-05 | 0,000394348 |
| ENSG00000135919 | SERPINE2   | -1,42 | 1,42E-05 | 0,000398924 |
| ENSG00000139209 | SLC38A4    | -1,64 | 1,42E-05 | 0,000400461 |
| ENSG00000167074 | TEF        | 0,73  | 1,43E-05 | 0,000400599 |
| ENSG00000250404 | AC090587.2 | 0,92  | 1,44E-05 | 0,00040305  |
| ENSG00000107263 | RAPGEF1    | -0,50 | 1,44E-05 | 0,000404285 |
| ENSG00000124813 | RUNX2      | 0,85  | 1,45E-05 | 0,000405951 |
| ENSG00000136930 | PSMB7      | -0,50 | 1,51E-05 | 0,000422452 |
| ENSG00000122566 | HNRNPA2B1  | 0,49  | 1,52E-05 | 0,000423017 |
| ENSG00000165821 | SALL2      | 1,17  | 1,55E-05 | 0,000431318 |
| ENSG00000112578 | BYSL       | -0,72 | 1,55E-05 | 0,000432091 |
| ENSG00000124593 | PRICKLE4   | 0,98  | 1,56E-05 | 0,000434487 |
| ENSG00000237264 | FTH1P11    | -0,85 | 1,57E-05 | 0,000435534 |
| ENSG00000163697 | APBB2      | -0,91 | 1,57E-05 | 0,0004356   |



|                 |               |       |          |             |
|-----------------|---------------|-------|----------|-------------|
| ENSG00000236739 | RP11-370B11.1 | -1,16 | 1,57E-05 | 0,0004356   |
| ENSG00000130147 | SH3BP4        | -0,78 | 1,62E-05 | 0,000447818 |
| ENSG00000131473 | ACLY          | -0,47 | 1,63E-05 | 0,000449783 |
| ENSG00000145386 | CCNA2         | 1,00  | 1,64E-05 | 0,000451684 |
| ENSG00000171004 | HS6ST2        | -0,89 | 1,67E-05 | 0,000458234 |
| ENSG00000136628 | EPRS          | -0,49 | 1,67E-05 | 0,000458585 |
| ENSG00000186376 | ZNF75D        | 0,64  | 1,69E-05 | 0,000464495 |
| ENSG00000063180 | CA11          | 0,80  | 1,70E-05 | 0,000465543 |
| ENSG00000146648 | EGFR          | -0,71 | 1,71E-05 | 0,000467531 |
| ENSG00000093134 | VNN3          | -1,02 | 1,72E-05 | 0,000470138 |
| ENSG00000164741 | DLC1          | -1,53 | 1,73E-05 | 0,00047053  |
| ENSG00000171471 | MAP1LC3B2     | -0,92 | 1,73E-05 | 0,00047053  |
| ENSG00000124406 | ATP8A1        | 0,91  | 1,73E-05 | 0,000471678 |
| ENSG00000207563 | MIR23B        | 1,37  | 1,74E-05 | 0,000472224 |
| ENSG00000096433 | ITPR3         | -0,74 | 1,75E-05 | 0,000473389 |
| ENSG00000176834 | VSIG10        | 0,69  | 1,75E-05 | 0,000473389 |
| ENSG00000137642 | SORL1         | 0,68  | 1,77E-05 | 0,00047879  |
| ENSG00000181513 | ACBD4         | 0,69  | 1,77E-05 | 0,000478888 |
| ENSG00000168758 | SEMA4C        | 0,58  | 1,78E-05 | 0,000480012 |
| ENSG00000160888 | IER2          | -0,84 | 1,79E-05 | 0,000483557 |
| ENSG00000124882 | EREG          | -1,08 | 1,80E-05 | 0,00048537  |
| ENSG00000185761 | ADAMTSL5      | 1,00  | 1,81E-05 | 0,000487474 |
| ENSG00000078579 | FGF20         | 1,60  | 1,82E-05 | 0,000488133 |
| ENSG00000140931 | CMTM3         | -0,99 | 1,84E-05 | 0,000493372 |
| ENSG00000159784 | FAM131B       | 1,01  | 1,87E-05 | 0,000500797 |
| ENSG00000184551 | AC132872.1    | -1,57 | 1,91E-05 | 0,00051151  |
| ENSG00000198363 | ASPH          | 0,61  | 1,95E-05 | 0,000519808 |
| ENSG00000126456 | IRF3          | 0,51  | 1,96E-05 | 0,000521015 |
| ENSG00000143442 | POGZ          | 0,43  | 1,96E-05 | 0,000521015 |
| ENSG00000189298 | ZKSCAN3       | 0,74  | 1,96E-05 | 0,000521015 |
| ENSG00000140598 | EFTUD1        | -0,56 | 1,97E-05 | 0,000522378 |
| ENSG00000268204 | CTD-3214H19.6 | 1,40  | 1,97E-05 | 0,000522714 |
| ENSG00000168389 | MFSD2A        | -0,92 | 1,98E-05 | 0,000523496 |
| ENSG00000115507 | OTX1          | 0,81  | 1,98E-05 | 0,000524081 |
| ENSG00000185324 | CDK10         | 0,52  | 2,02E-05 | 0,000532056 |
| ENSG00000103067 | ESRP2         | 0,49  | 2,08E-05 | 0,000549404 |
| ENSG00000213015 | ZNF580        | 0,63  | 2,13E-05 | 0,000561356 |
| ENSG00000146842 | TMEM209       | -0,61 | 2,14E-05 | 0,000561442 |
| ENSG00000184220 | CMSS1         | -0,75 | 2,14E-05 | 0,000561442 |
| ENSG00000174564 | IL2ORB        | 0,55  | 2,18E-05 | 0,000571789 |
| ENSG00000072274 | TFRC          | -0,84 | 2,21E-05 | 0,000578638 |
| ENSG00000225614 | ZNF469        | -1,43 | 2,23E-05 | 0,000581788 |
| ENSG00000114268 | PFKFB4        | -0,97 | 2,23E-05 | 0,00058282  |
| ENSG00000125821 | DTD1          | -0,61 | 2,25E-05 | 0,000586497 |

|                 |              |       |          |             |
|-----------------|--------------|-------|----------|-------------|
| ENSG00000129151 | BBOX1        | 0,79  | 2,27E-05 | 0,000590737 |
| ENSG00000267283 | AC005306.3   | 0,91  | 2,27E-05 | 0,000591419 |
| ENSG00000147364 | FBXO25       | -0,74 | 2,30E-05 | 0,000596669 |
| ENSG00000168743 | NPNT         | 1,31  | 2,31E-05 | 0,000598706 |
| ENSG00000213918 | DNASE1       | 0,73  | 2,32E-05 | 0,000601293 |
| ENSG00000132341 | RAN          | -0,50 | 2,33E-05 | 0,000601844 |
| ENSG00000137501 | SYTL2        | 0,52  | 2,33E-05 | 0,000601844 |
| ENSG00000119285 | HEATR1       | -0,53 | 2,35E-05 | 0,000605513 |
| ENSG00000168209 | DDIT4        | 0,76  | 2,35E-05 | 0,000605513 |
| ENSG00000197045 | GMFB         | -0,52 | 2,35E-05 | 0,000605513 |
| ENSG00000181577 | C6orf223     | -1,00 | 2,40E-05 | 0,000616235 |
| ENSG00000100221 | JOSD1        | -0,51 | 2,47E-05 | 0,000633567 |
| ENSG00000165879 | FRAT1        | 0,81  | 2,51E-05 | 0,000643884 |
| ENSG00000173581 | CCDC106      | 0,56  | 2,52E-05 | 0,000645399 |
| ENSG00000235888 | AF064858.8   | 1,46  | 2,53E-05 | 0,000647284 |
| ENSG00000183077 | AFMID        | 0,73  | 2,55E-05 | 0,000650042 |
| ENSG00000124191 | TOX2         | -1,59 | 2,56E-05 | 0,000652993 |
| ENSG00000158710 | TAGLN2       | -0,69 | 2,58E-05 | 0,000656585 |
| ENSG00000096092 | TMEM14A      | 0,60  | 2,59E-05 | 0,000658494 |
| ENSG00000166224 | SGPL1        | -0,45 | 2,60E-05 | 0,000659166 |
| ENSG00000101400 | SNTA1        | 0,83  | 2,62E-05 | 0,000663124 |
| ENSG00000077150 | NFKB2        | -0,67 | 2,62E-05 | 0,000664441 |
| ENSG00000070404 | FSTL3        | -1,38 | 2,64E-05 | 0,000667492 |
| ENSG00000086544 | ITPKC        | -0,52 | 2,67E-05 | 0,000673972 |
| ENSG00000214193 | SH3D21       | 0,92  | 2,68E-05 | 0,00067549  |
| ENSG00000248771 | RP11-294O2.2 | 0,71  | 2,68E-05 | 0,00067549  |
| ENSG00000013561 | RNF14        | -0,43 | 2,72E-05 | 0,000683029 |
| ENSG00000176915 | ANKLE2       | -0,76 | 2,72E-05 | 0,000683029 |
| ENSG00000156284 | CLDN8        | 1,39  | 2,75E-05 | 0,000689653 |
| ENSG00000185551 | NR2F2        | 0,51  | 2,75E-05 | 0,000689653 |
| ENSG00000129675 | ARHGEF6      | 0,69  | 2,76E-05 | 0,000690089 |
| ENSG00000070808 | CAMK2A       | -1,42 | 2,78E-05 | 0,000693904 |
| ENSG00000261254 | RP4-714D9.5  | 0,96  | 2,78E-05 | 0,000694407 |
| ENSG00000137648 | TMPRSS4      | 0,62  | 2,79E-05 | 0,000694825 |
| ENSG00000178150 | ZNF114       | -1,54 | 2,79E-05 | 0,000695835 |
| ENSG00000181467 | RAP2B        | -0,67 | 2,80E-05 | 0,000695934 |
| ENSG00000198522 | GPN1         | -0,54 | 2,80E-05 | 0,000695934 |
| ENSG00000007944 | MYLIP        | 0,71  | 2,81E-05 | 0,000696093 |
| ENSG00000164626 | KCNK5        | 1,02  | 2,81E-05 | 0,000696093 |
| ENSG00000240038 | AMY2B        | 0,82  | 2,81E-05 | 0,000696093 |
| ENSG00000229644 | NAMPTL       | -0,88 | 2,82E-05 | 0,000696571 |
| ENSG00000163110 | PDLIM5       | -0,46 | 2,84E-05 | 0,000701608 |
| ENSG00000197355 | UAP1L1       | -0,94 | 2,85E-05 | 0,000701921 |
| ENSG00000112964 | GHR          | 1,38  | 2,91E-05 | 0,000716697 |

|                 |               |       |          |             |
|-----------------|---------------|-------|----------|-------------|
| ENSG00000112972 | HMGCS1        | -0,80 | 2,92E-05 | 0,000718447 |
| ENSG00000100644 | HIF1A         | -0,82 | 2,94E-05 | 0,000722696 |
| ENSG00000260604 | RP1-140K8.5   | -1,52 | 2,95E-05 | 0,000722696 |
| ENSG00000131398 | KCNC3         | 0,97  | 2,97E-05 | 0,000728448 |
| ENSG00000186567 | CEACAM19      | -1,08 | 3,00E-05 | 0,000733881 |
| ENSG00000141574 | SECTM1        | -0,75 | 3,03E-05 | 0,000739989 |
| ENSG00000082482 | KCNK2         | 1,58  | 3,05E-05 | 0,00074333  |
| ENSG00000186812 | ZNF397        | 0,46  | 3,07E-05 | 0,000748787 |
| ENSG00000272977 | CTA-390C10.10 | 0,85  | 3,09E-05 | 0,000751184 |
| ENSG00000125538 | IL1B          | -1,28 | 3,12E-05 | 0,000757655 |
| ENSG00000048707 | VPS13D        | 0,61  | 3,14E-05 | 0,000763054 |
| ENSG00000188266 | HYKK          | 0,85  | 3,15E-05 | 0,000764101 |
| ENSG00000106133 | NSUN5P2       | 0,64  | 3,17E-05 | 0,000767171 |
| ENSG00000105835 | NAMPT         | -0,82 | 3,21E-05 | 0,000776444 |
| ENSG00000095596 | CYP26A1       | 1,41  | 3,24E-05 | 0,000783371 |
| ENSG00000163395 | IGFN1         | -1,57 | 3,25E-05 | 0,000783371 |
| ENSG00000196405 | EVL           | 0,54  | 3,28E-05 | 0,000790752 |
| ENSG00000117480 | FAAH          | 0,61  | 3,29E-05 | 0,00079299  |
| ENSG00000117308 | GALE          | 0,62  | 3,30E-05 | 0,000793775 |
| ENSG00000176454 | LPCAT4        | 0,83  | 3,33E-05 | 0,000798763 |
| ENSG00000186834 | HEXIM1        | 0,60  | 3,40E-05 | 0,000815722 |
| ENSG00000040531 | CTNS          | -0,63 | 3,44E-05 | 0,000824832 |
| ENSG00000115457 | IGFBP2        | 0,46  | 3,48E-05 | 0,00083326  |
| ENSG00000104870 | FCGRT         | 0,77  | 3,53E-05 | 0,000844087 |
| ENSG00000212719 | C17orf51      | -0,79 | 3,57E-05 | 0,000850943 |
| ENSG00000244405 | ETV5          | -1,49 | 3,57E-05 | 0,000850997 |
| ENSG00000042980 | ADAM28        | 1,01  | 3,58E-05 | 0,00085266  |
| ENSG00000196923 | PDLIM7        | -1,17 | 3,59E-05 | 0,00085266  |
| ENSG00000184678 | HIST2H2BE     | -0,76 | 3,60E-05 | 0,00085557  |
| ENSG00000107104 | KANK1         | 0,58  | 3,66E-05 | 0,000867603 |
| ENSG00000183087 | GAS6          | -1,15 | 3,68E-05 | 0,000870799 |
| ENSG00000185736 | ADARB2        | 0,87  | 3,68E-05 | 0,000870799 |
| ENSG00000223361 | FTH1P10       | -0,84 | 3,71E-05 | 0,000875535 |
| ENSG00000243649 | CFB           | -0,99 | 3,71E-05 | 0,000875535 |
| ENSG00000139192 | TAPBPL        | 0,50  | 3,75E-05 | 0,00088296  |
| ENSG00000054267 | ARID4B        | 0,43  | 3,77E-05 | 0,000886517 |
| ENSG00000163959 | SLC51A        | 0,79  | 3,77E-05 | 0,000887076 |
| ENSG00000153208 | MERTK         | -1,14 | 3,78E-05 | 0,000887432 |
| ENSG00000160326 | SLC2A6        | -1,28 | 3,78E-05 | 0,000887869 |
| ENSG00000100401 | RANGAP1       | -0,58 | 3,95E-05 | 0,000924942 |
| ENSG00000175793 | SFN           | -1,05 | 4,03E-05 | 0,000943226 |
| ENSG00000115758 | ODC1          | -0,98 | 4,04E-05 | 0,000943612 |
| ENSG00000168159 | RNF187        | -0,52 | 4,05E-05 | 0,000945416 |
| ENSG00000121060 | TRIM25        | -0,46 | 4,11E-05 | 0,000958839 |

|                 |               |       |          |             |
|-----------------|---------------|-------|----------|-------------|
| ENSG00000161395 | PGAP3         | 0,48  | 4,19E-05 | 0,000976311 |
| ENSG00000002016 | RAD52         | 0,73  | 4,21E-05 | 0,000978888 |
| ENSG00000198729 | PPP1R14C      | -0,81 | 4,21E-05 | 0,000978888 |
| ENSG00000126524 | SBDS          | -0,58 | 4,27E-05 | 0,00098894  |
| ENSG00000163882 | POLR2H        | 0,46  | 4,26E-05 | 0,00098894  |
| ENSG00000007392 | LUC7L         | 0,47  | 4,42E-05 | 0,00102374  |
| ENSG00000224934 | RP11-441O15.3 | 1,12  | 4,43E-05 | 0,001025011 |
| ENSG00000144452 | ABCA12        | -0,98 | 4,47E-05 | 0,001033428 |
| ENSG00000065135 | GNAI3         | -0,42 | 4,48E-05 | 0,001034145 |
| ENSG00000152894 | PTPRK         | -0,80 | 4,54E-05 | 0,001044121 |
| ENSG00000235194 | PPP1R3E       | 0,80  | 4,54E-05 | 0,001044121 |
| ENSG00000120458 | MSANTD2       | 0,62  | 4,56E-05 | 0,001048499 |
| ENSG00000106415 | GLCCI1        | 0,72  | 4,58E-05 | 0,001052424 |
| ENSG00000249631 | RP11-281P23.2 | 1,03  | 4,70E-05 | 0,001078862 |
| ENSG00000185499 | MUC1          | 0,43  | 4,72E-05 | 0,00108006  |
| ENSG00000113119 | TMCO6         | 0,69  | 4,73E-05 | 0,001082353 |
| ENSG00000104368 | PLAT          | 1,17  | 4,78E-05 | 0,00109065  |
| ENSG00000174326 | SLC16A11      | 1,34  | 4,78E-05 | 0,00109065  |
| ENSG00000135269 | TES           | -0,49 | 4,88E-05 | 0,001110854 |
| ENSG00000145220 | LYAR          | -0,74 | 4,88E-05 | 0,001110854 |
| ENSG00000157110 | RBPMS         | 0,64  | 4,88E-05 | 0,001110854 |
| ENSG00000203896 | LIME1         | 0,85  | 4,91E-05 | 0,001115038 |
| ENSG00000100344 | PNPLA3        | -0,75 | 4,96E-05 | 0,001122132 |
| ENSG00000170509 | HSD17B13      | 1,22  | 4,95E-05 | 0,001122132 |
| ENSG00000248713 | RP11-766F14.2 | -1,49 | 4,95E-05 | 0,001122132 |
| ENSG00000170921 | TANC2         | -0,47 | 4,98E-05 | 0,00112617  |
| ENSG00000204839 | MROH6         | 0,96  | 5,00E-05 | 0,001129216 |
| ENSG00000214128 | TMEM213       | 1,32  | 5,01E-05 | 0,001129374 |
| ENSG00000122877 | EGR2          | -1,50 | 5,06E-05 | 0,001139431 |
| ENSG00000138336 | TET1          | 1,32  | 5,07E-05 | 0,001140897 |
| ENSG00000124299 | PEPD          | -0,48 | 5,16E-05 | 0,001159665 |
| ENSG00000132680 | KIAA0907      | 0,59  | 5,19E-05 | 0,001165072 |
| ENSG00000171552 | BCL2L1        | -0,57 | 5,19E-05 | 0,001165072 |
| ENSG00000167333 | TRIM68        | 0,63  | 5,23E-05 | 0,001170812 |
| ENSG00000117395 | EBNA1BP2      | -0,46 | 5,24E-05 | 0,001172097 |
| ENSG00000102996 | MMP15         | -0,50 | 5,27E-05 | 0,001176987 |
| ENSG00000184083 | FAM120C       | 0,76  | 5,28E-05 | 0,001179455 |
| ENSG00000111696 | NT5DC3        | -0,66 | 5,30E-05 | 0,001181253 |
| ENSG00000188037 | CLCN1         | 1,22  | 5,33E-05 | 0,00118667  |
| ENSG00000222009 | BTBD19        | -1,07 | 5,37E-05 | 0,001194211 |
| ENSG00000149591 | TAGLN         | -1,52 | 5,38E-05 | 0,001195636 |
| ENSG00000204859 | ZBTB48        | 0,45  | 5,40E-05 | 0,001199521 |
| ENSG00000136826 | KLF4          | -1,06 | 5,47E-05 | 0,001212492 |
| ENSG00000130701 | RBBP8NL       | 0,77  | 5,53E-05 | 0,001224844 |

|                 |               |       |          |             |
|-----------------|---------------|-------|----------|-------------|
| ENSG00000185479 | KRT6B         | -1,48 | 5,58E-05 | 0,001234942 |
| ENSG00000185630 | PBX1          | 0,64  | 5,59E-05 | 0,001235779 |
| ENSG00000272335 | RP11-53O19.3  | 0,73  | 5,61E-05 | 0,001237906 |
| ENSG00000164742 | ADCY1         | -1,42 | 5,64E-05 | 0,001242639 |
| ENSG00000108654 | DDX5          | 0,45  | 5,69E-05 | 0,001253384 |
| ENSG00000162595 | DIRAS3        | 1,35  | 5,70E-05 | 0,001254548 |
| ENSG00000186814 | ZSCAN30       | 0,57  | 5,74E-05 | 0,001260127 |
| ENSG00000236603 | RANP1         | -0,51 | 5,74E-05 | 0,001260127 |
| ENSG00000250643 | RP11-93K22.6  | 1,17  | 5,82E-05 | 0,001275183 |
| ENSG00000100664 | EIF5          | -0,36 | 5,83E-05 | 0,001277368 |
| ENSG00000109689 | STIM2         | 0,50  | 5,86E-05 | 0,001281544 |
| ENSG00000188747 | NOXA1         | 0,87  | 5,93E-05 | 0,00129508  |
| ENSG00000135596 | MICAL1        | -0,80 | 5,95E-05 | 0,001298343 |
| ENSG00000186193 | SAPCD2        | 0,91  | 5,96E-05 | 0,001299525 |
| ENSG00000186847 | KRT14         | -0,91 | 5,98E-05 | 0,001300523 |
| ENSG00000196150 | ZNF250        | 0,61  | 5,98E-05 | 0,001300523 |
| ENSG00000006016 | CRLF1         | 1,08  | 6,03E-05 | 0,001310389 |
| ENSG00000150593 | PDCD4         | 0,64  | 6,07E-05 | 0,001318219 |
| ENSG00000058085 | LAMC2         | -1,11 | 6,13E-05 | 0,00132742  |
| ENSG00000185101 | ANO9          | 0,73  | 6,13E-05 | 0,00132742  |
| ENSG00000081138 | CDH7          | 1,52  | 6,14E-05 | 0,001328843 |
| ENSG00000075624 | ACTB          | -0,76 | 6,30E-05 | 0,00135926  |
| ENSG00000128656 | CHN1          | -0,97 | 6,29E-05 | 0,00135926  |
| ENSG00000002079 | MYH16         | -1,42 | 6,32E-05 | 0,001359533 |
| ENSG00000100311 | PDGFB         | -1,43 | 6,31E-05 | 0,001359533 |
| ENSG00000261408 | TEN1-CDK3     | 1,18  | 6,32E-05 | 0,001359533 |
| ENSG00000113068 | PFDN1         | -0,49 | 6,33E-05 | 0,001360787 |
| ENSG00000174938 | SEZ6L2        | 0,71  | 6,37E-05 | 0,001368081 |
| ENSG00000160200 | CBS           | -1,30 | 6,43E-05 | 0,001377976 |
| ENSG00000165359 | DDX26B        | 0,57  | 6,46E-05 | 0,001383035 |
| ENSG00000107404 | DVL1          | -0,50 | 6,48E-05 | 0,001385158 |
| ENSG00000236404 | RP11-125B21.2 | -1,36 | 6,48E-05 | 0,001385158 |
| ENSG00000175582 | RAB6A         | -0,40 | 6,51E-05 | 0,001390307 |
| ENSG00000067445 | TRO           | 1,50  | 6,55E-05 | 0,001394983 |
| ENSG00000078237 | C12orf5       | -0,75 | 6,55E-05 | 0,001394983 |
| ENSG00000154813 | DPH3          | -0,59 | 6,59E-05 | 0,001401184 |
| ENSG00000168010 | ATG16L2       | 0,88  | 6,62E-05 | 0,001407797 |
| ENSG00000116852 | KIF21B        | -1,31 | 6,70E-05 | 0,001422983 |
| ENSG00000123636 | BAZ2B         | 0,46  | 6,76E-05 | 0,001432492 |
| ENSG00000214290 | COLCA2        | 0,60  | 6,85E-05 | 0,001450397 |
| ENSG00000169925 | BRD3          | 0,43  | 6,90E-05 | 0,001459506 |
| ENSG00000172986 | GXYLT2        | 0,81  | 6,91E-05 | 0,001460285 |
| ENSG00000153291 | SLC25A27      | 0,79  | 6,92E-05 | 0,001460289 |
| ENSG00000165512 | ZNF22         | -0,60 | 6,96E-05 | 0,001467951 |

|                 |               |       |             |             |
|-----------------|---------------|-------|-------------|-------------|
| ENSG00000079459 | FDFT1         | -0,45 | 6,99E-05    | 0,00147356  |
| ENSG00000177076 | ACER2         | -0,69 | 7,13E-05    | 0,001500585 |
| ENSG00000127483 | HP1BP3        | 0,59  | 7,19E-05    | 0,001512375 |
| ENSG00000196072 | BLOC1S2       | -0,67 | 7,24E-05    | 0,001519481 |
| ENSG00000166888 | STAT6         | 0,46  | 7,25E-05    | 0,001521028 |
| ENSG00000162458 | FBLIM1        | -0,88 | 7,31E-05    | 0,001531993 |
| ENSG00000272761 | RP11-572C15.6 | 1,17  | 7,32E-05    | 0,001532871 |
| ENSG00000100558 | PLEK2         | -0,95 | 7,38E-05    | 0,001542419 |
| ENSG00000179630 | LACC1         | -0,53 | 7,45E-05    | 0,001555217 |
| ENSG00000234975 | FTH1P2        | -0,80 | 7,53E-05    | 0,001571437 |
| ENSG00000246273 | SBF2-AS1      | -0,72 | 7,66E-05    | 0,001595666 |
| ENSG00000233622 | CYP2T2P       | 1,11  | 7,68E-05    | 0,001598122 |
| ENSG00000269353 | AC092071.1    | 1,15  | 7,78E-05    | 0,001617234 |
| ENSG00000139835 | GRTP1         | 0,69  | 7,87E-05    | 0,001633918 |
| ENSG00000116514 | RNF19B        | -0,48 | 8,09E-05    | 0,001679554 |
| ENSG00000114850 | SSR3          | -0,51 | 8,10E-05    | 0,001679952 |
| ENSG00000171310 | CHST11        | -0,74 | 8,13E-05    | 0,001683464 |
| ENSG00000188811 | NHLRC3        | 0,58  | 8,22E-05    | 0,00169969  |
| ENSG00000075643 | MOCOS         | -0,83 | 8,27E-05    | 0,001708189 |
| ENSG00000188706 | ZDHHC9        | -0,44 | 8,28E-05    | 0,001708189 |
| ENSG00000074590 | NUAK1         | -0,83 | 8,41E-05    | 0,001734298 |
| ENSG00000203837 | PNLIPRP3      | -1,47 | 8,46E-05    | 0,001743174 |
| ENSG00000229544 | NKX1-2        | -1,48 | 8,59E-05    | 0,001767065 |
| ENSG00000123130 | ACOT9         | -0,45 | 8,63E-05    | 0,001774717 |
| ENSG00000171345 | KRT19         | 0,67  | 8,77E-05    | 0,001798748 |
| ENSG00000260822 | GS1-358P8.4   | 0,72  | 8,77E-05    | 0,001798748 |
| ENSG00000150051 | MKX           | -1,02 | 8,89E-05    | 0,001822441 |
| ENSG00000118640 | VAMP8         | 0,43  | 9,09E-05    | 0,001859981 |
| ENSG00000089335 | ZNF302        | 0,58  | 9,39E-05    | 0,001919976 |
| ENSG00000148671 | ADIRF         | 1,30  | 9,46E-05    | 0,001931328 |
| ENSG00000023445 | BIRC3         | -1,03 | 9,52E-05    | 0,001940117 |
| ENSG00000102878 | HSF4          | 0,78  | 9,52E-05    | 0,001940117 |
| ENSG00000264112 | RP11-159D12.2 | 0,56  | 9,57E-05    | 0,00194896  |
| ENSG00000145029 | NICN1         | 0,50  | 9,59E-05    | 0,001951318 |
| ENSG00000106245 | BUD31         | -0,44 | 9,69E-05    | 0,001968231 |
| ENSG00000118579 | MED28         | 0,55  | 9,72E-05    | 0,001973075 |
| ENSG00000106714 | CNTNAP3       | 0,87  | 9,77E-05    | 0,001978026 |
| ENSG00000108557 | RAI1          | 0,49  | 9,76E-05    | 0,001978026 |
| ENSG00000185920 | PTCH1         | -0,58 | 9,89E-05    | 0,002001907 |
| ENSG00000163701 | IL17RE        | 0,71  | 9,97E-05    | 0,002014732 |
| ENSG00000153317 | ASAP1         | -0,54 | 0,000100231 | 0,002023793 |
| ENSG00000160293 | VAV2          | -0,75 | 0,000100691 | 0,002030966 |
| ENSG00000006652 | IFRD1         | -0,79 | 0,000100958 | 0,002034236 |
| ENSG00000224511 | LINC00365     | -0,97 | 0,00010226  | 0,002058337 |

|                 |               |       |             |             |
|-----------------|---------------|-------|-------------|-------------|
| ENSG00000173812 | EIF1          | -0,55 | 0,000102548 | 0,002061994 |
| ENSG00000235109 | ZSCAN31       | 0,63  | 0,000103363 | 0,002076243 |
| ENSG00000144366 | GULP1         | -1,08 | 0,000103592 | 0,002078686 |
| ENSG00000151718 | WWC2          | -0,58 | 0,000104335 | 0,002091433 |
| ENSG00000103415 | HMOX2         | -0,43 | 0,000104628 | 0,002095151 |
| ENSG00000133624 | ZNF767        | 0,60  | 0,000106794 | 0,002136311 |
| ENSG00000156976 | EIF4A2        | 0,36  | 0,000107052 | 0,002139277 |
| ENSG00000128283 | CDC42EP1      | -0,85 | 0,00010756  | 0,002146692 |
| ENSG00000167779 | IGFBP6        | 1,29  | 0,000107644 | 0,002146692 |
| ENSG00000104863 | LIN7B         | 1,05  | 0,000107996 | 0,002151436 |
| ENSG00000185650 | ZFP36L1       | -0,37 | 0,000108103 | 0,002151436 |
| ENSG00000072163 | LIMS2         | -1,45 | 0,000108337 | 0,00215388  |
| ENSG00000196542 | SPTSSB        | 1,41  | 0,00010936  | 0,002172001 |
| ENSG00000099194 | SCD           | -0,98 | 0,000109672 | 0,002175972 |
| ENSG00000239665 | RP11-295P9.3  | 0,43  | 0,000109968 | 0,002179609 |
| ENSG00000114315 | HES1          | 0,61  | 0,000110374 | 0,002185432 |
| ENSG00000123080 | CDKN2C        | 0,95  | 0,000111635 | 0,002208141 |
| ENSG00000213930 | GALT          | 0,66  | 0,000112604 | 0,002225047 |
| ENSG00000176593 | CTD-2368P22.1 | 0,64  | 0,000113891 | 0,002248189 |
| ENSG00000006432 | MAP3K9        | -0,51 | 0,000114307 | 0,00225412  |
| ENSG00000175213 | ZNF408        | -0,48 | 0,000114578 | 0,002257156 |
| ENSG00000182919 | C11orf54      | 0,61  | 0,000114702 | 0,002257314 |
| ENSG00000262198 | RP11-124N19.3 | 1,45  | 0,000116057 | 0,002281662 |
| ENSG00000144824 | PHLDB2        | -0,72 | 0,000116174 | 0,002281662 |
| ENSG00000134824 | FADS2         | -0,94 | 0,000116526 | 0,002286263 |
| ENSG00000164691 | TAGAP         | -1,38 | 0,00011691  | 0,00229149  |
| ENSG00000108861 | DUSP3         | -0,67 | 0,000117469 | 0,002295488 |
| ENSG00000168301 | KCTD6         | 0,79  | 0,000117421 | 0,002295488 |
| ENSG00000169857 | AVEN          | -0,70 | 0,00011729  | 0,002295488 |
| ENSG00000215845 | TSTD1         | 0,61  | 0,000117854 | 0,002300701 |
| ENSG00000175197 | DDIT3         | -0,92 | 0,00011823  | 0,002305714 |
| ENSG00000109472 | CPE           | -1,01 | 0,000119114 | 0,002317599 |
| ENSG00000117450 | PRDX1         | 0,65  | 0,000119197 | 0,002317599 |
| ENSG00000242265 | PEG10         | -0,93 | 0,000118975 | 0,002317599 |
| ENSG00000008294 | SPAG9         | -0,56 | 0,00012023  | 0,002333318 |
| ENSG00000114770 | ABCC5         | 0,53  | 0,000120246 | 0,002333318 |
| ENSG00000172939 | OXR1          | -0,43 | 0,000121093 | 0,002347409 |
| ENSG00000105640 | RPL18A        | -0,90 | 0,000121428 | 0,002350394 |
| ENSG00000174744 | BRMS1         | -0,53 | 0,00012161  | 0,002350394 |
| ENSG00000186160 | CYP4Z1        | 0,84  | 0,000121606 | 0,002350394 |
| ENSG00000162434 | JAK1          | -0,55 | 0,000122083 | 0,002354852 |
| ENSG00000233725 | LINC00284     | 0,87  | 0,000122055 | 0,002354852 |
| ENSG00000087077 | TRIP6         | 0,52  | 0,000122539 | 0,002358966 |
| ENSG00000164949 | GEM           | -1,41 | 0,000122431 | 0,002358966 |

|                 |             |       |             |             |
|-----------------|-------------|-------|-------------|-------------|
| ENSG00000116560 | SFPQ        | 0,38  | 0,000122767 | 0,002361021 |
| ENSG00000249328 | RP11-26J3.1 | -1,45 | 0,000124825 | 0,002398217 |
| ENSG00000159200 | RCAN1       | -0,86 | 0,000125704 | 0,002412731 |
| ENSG00000150753 | CCT5        | -0,42 | 0,000126087 | 0,002417689 |
| ENSG00000137462 | TLR2        | -1,01 | 0,000126264 | 0,002418697 |
| ENSG00000214021 | TTLL3       | 0,63  | 0,000126877 | 0,002428045 |
| ENSG00000092096 | SLC22A17    | 1,08  | 0,000127276 | 0,002433275 |
| ENSG00000166900 | STX3        | -0,52 | 0,000128222 | 0,002448961 |
| ENSG00000124177 | CHD6        | 0,40  | 0,000128814 | 0,00245785  |
| ENSG00000107863 | ARHGAP21    | -0,45 | 0,000129261 | 0,002459805 |
| ENSG00000148677 | ANKRD1      | -1,43 | 0,000129297 | 0,002459805 |
| ENSG00000197782 | ZNF780A     | 0,56  | 0,000129241 | 0,002459805 |
| ENSG00000174684 | B3GNT1      | 0,72  | 0,000129872 | 0,002468329 |
| ENSG00000100842 | EFS         | 0,81  | 0,000130239 | 0,002470511 |
| ENSG00000125266 | EFNB2       | -0,77 | 0,000130241 | 0,002470511 |
| ENSG00000127824 | TUBA4A      | -0,90 | 0,000131011 | 0,002480274 |
| ENSG00000170791 | CHCHD7      | 0,53  | 0,000130932 | 0,002480274 |
| ENSG00000179362 | HMG2P46     | -1,25 | 0,000131948 | 0,002495572 |
| ENSG00000154229 | PRKCA       | 0,90  | 0,000132713 | 0,002507614 |
| ENSG00000064652 | SNX24       | -0,68 | 0,000135122 | 0,002550635 |
| ENSG00000163393 | SLC22A15    | -0,63 | 0,000135462 | 0,002552098 |
| ENSG00000170345 | FOS         | -0,64 | 0,00013542  | 0,002552098 |
| ENSG00000183208 | GDPGP1      | 0,67  | 0,000138087 | 0,002599037 |
| ENSG00000147044 | CASK        | -0,55 | 0,000138841 | 0,002610692 |
| ENSG00000137343 | ATAT1       | 0,46  | 0,000139639 | 0,002620625 |
| ENSG00000173638 | SLC19A1     | -0,78 | 0,000139584 | 0,002620625 |
| ENSG00000149289 | ZC3H12C     | -0,71 | 0,000140621 | 0,0026365   |
| ENSG00000059728 | MXD1        | -0,80 | 0,000141141 | 0,002643696 |
| ENSG00000137309 | HMGA1       | -0,78 | 0,000142039 | 0,002657971 |
| ENSG00000183648 | NDUFB1      | 0,78  | 0,000142487 | 0,00266378  |
| ENSG00000136688 | IL36G       | -1,42 | 0,000143744 | 0,002684692 |
| ENSG00000152518 | ZFP36L2     | -0,69 | 0,000144468 | 0,002695622 |
| ENSG00000225447 | RPS15AP10   | 1,35  | 0,000145935 | 0,002720391 |
| ENSG00000204616 | TRIM31      | -0,77 | 0,000146322 | 0,002724987 |
| ENSG00000143797 | MBOAT2      | 0,59  | 0,000147909 | 0,002751902 |
| ENSG00000144802 | NFKBIZ      | -0,84 | 0,000149249 | 0,002770636 |
| ENSG00000174099 | MSRB3       | -1,41 | 0,000149344 | 0,002770636 |
| ENSG00000223813 | AC007255.8  | 1,10  | 0,00014908  | 0,002770636 |
| ENSG00000177311 | ZBTB38      | -0,50 | 0,000149774 | 0,002775962 |
| ENSG00000180398 | MCFD2       | -0,48 | 0,000149935 | 0,002776303 |
| ENSG00000204650 | CRHR1-IT1   | 0,58  | 0,000151224 | 0,002797508 |
| ENSG00000139631 | CSAD        | 0,52  | 0,000153084 | 0,002829222 |
| ENSG00000050820 | BCAR1       | -0,51 | 0,000153895 | 0,002839502 |
| ENSG00000164011 | ZNF691      | 0,66  | 0,000153933 | 0,002839502 |



|                 |               |       |             |             |
|-----------------|---------------|-------|-------------|-------------|
| ENSG00000168952 | STXBP6        | 0,91  | 0,000154139 | 0,002840599 |
| ENSG00000154451 | GBP5          | -0,89 | 0,000155459 | 0,002862208 |
| ENSG00000125285 | SOX21         | 1,03  | 0,00015563  | 0,002862643 |
| ENSG00000145685 | LHFPL2        | -0,82 | 0,000156177 | 0,00286999  |
| ENSG00000130254 | SAFB2         | 0,41  | 0,000156357 | 0,002870593 |
| ENSG00000186197 | EDARADD       | 0,68  | 0,000156531 | 0,002871064 |
| ENSG00000177685 | EFCAB4A       | 0,84  | 0,000156793 | 0,002873163 |
| ENSG00000132716 | DCAF8         | 0,47  | 0,00015716  | 0,002875575 |
| ENSG00000230409 | TCEA1P2       | -0,49 | 0,000157221 | 0,002875575 |
| ENSG00000218418 | RP11-296E7.1  | -0,48 | 0,000158307 | 0,002892714 |
| ENSG00000117597 | DIEXF         | -0,47 | 0,000158607 | 0,002895476 |
| ENSG00000197969 | VPS13A        | 0,45  | 0,000160025 | 0,002918625 |
| ENSG00000163235 | TGFA          | -0,50 | 0,00016083  | 0,002930539 |
| ENSG00000108960 | MMD           | -0,96 | 0,000161882 | 0,002946944 |
| ENSG00000269821 | KCNQ1OT1      | 0,52  | 0,000162086 | 0,002947908 |
| ENSG00000008256 | CYTH3         | -0,51 | 0,00016484  | 0,002995191 |
| ENSG00000185803 | SLC52A2       | -0,49 | 0,000165034 | 0,002995915 |
| ENSG00000143633 | C1orf131      | 0,54  | 0,000165316 | 0,002998225 |
| ENSG00000188153 | COL4A5        | 0,67  | 0,000167144 | 0,003028557 |
| ENSG00000187650 | VMAC          | 0,96  | 0,000167607 | 0,003034117 |
| ENSG00000169594 | BNC1          | -0,77 | 0,000168218 | 0,003042338 |
| ENSG00000080947 | CROCCP3       | 0,64  | 0,000169184 | 0,003056966 |
| ENSG00000135451 | TROAP         | 1,09  | 0,000171358 | 0,003093358 |
| ENSG00000139641 | ESYT1         | -0,65 | 0,000173438 | 0,003128009 |
| ENSG00000235750 | KIAA0040      | -0,51 | 0,00017442  | 0,00314279  |
| ENSG00000170779 | CDCA4         | -0,86 | 0,000174741 | 0,003145661 |
| ENSG00000132911 | NMUR2         | 1,39  | 0,000178462 | 0,003209666 |
| ENSG00000258301 | RP11-488C13.5 | 0,67  | 0,000178867 | 0,003213988 |
| ENSG00000227288 | RP5-837I24.1  | -1,02 | 0,000181124 | 0,003251522 |
| ENSG00000120526 | NUDCD1        | -0,56 | 0,000181364 | 0,003252836 |
| ENSG00000169258 | GPRIN1        | -0,86 | 0,000182049 | 0,003262094 |
| ENSG00000244067 | GSTA2         | 0,86  | 0,000183559 | 0,003286125 |
| ENSG00000110195 | FOLR1         | 1,02  | 0,000186462 | 0,003335029 |
| ENSG00000088448 | ANKRD10       | 0,39  | 0,000186955 | 0,003340762 |
| ENSG00000119688 | ABCD4         | 0,39  | 0,000188202 | 0,003356882 |
| ENSG00000140451 | PIF1          | 1,41  | 0,000188035 | 0,003356882 |
| ENSG00000186432 | KPNA4         | -0,44 | 0,000189259 | 0,003369779 |
| ENSG00000272645 | RP11-504P24.8 | 0,77  | 0,000189272 | 0,003369779 |
| ENSG00000245958 | RP11-33B1.1   | 0,59  | 0,000191379 | 0,00340417  |
| ENSG00000187608 | ISG15         | -1,10 | 0,000192131 | 0,00341441  |
| ENSG00000165071 | TMEM71        | 0,84  | 0,000192442 | 0,003416814 |
| ENSG00000110880 | CORO1C        | -0,56 | 0,000196302 | 0,003482158 |
| ENSG00000115946 | PNO1          | -0,49 | 0,000197036 | 0,003492002 |
| ENSG00000141431 | ASXL3         | 1,32  | 0,000197327 | 0,003493965 |

|                 |               |       |             |             |
|-----------------|---------------|-------|-------------|-------------|
| ENSG00000141232 | TOB1          | 0,50  | 0,000197682 | 0,003497065 |
| ENSG00000197496 | SLC2A10       | 0,59  | 0,000199123 | 0,003519354 |
| ENSG00000124222 | STX16         | 0,43  | 0,000202655 | 0,00357852  |
| ENSG00000042286 | AIFM2         | -0,66 | 0,000203879 | 0,003593591 |
| ENSG00000248144 | ADH1C         | 1,19  | 0,00020372  | 0,003593591 |
| ENSG00000259354 | RP11-519G16.3 | -1,27 | 0,000204772 | 0,003606072 |
| ENSG00000269190 | FBXO17        | 1,09  | 0,000205619 | 0,003617703 |
| ENSG00000112249 | ASCC3         | -0,41 | 0,000206623 | 0,003632075 |
| ENSG00000105426 | PTPRS         | 0,86  | 0,000208397 | 0,003659107 |
| ENSG00000163659 | TIPARP        | -0,55 | 0,000208537 | 0,003659107 |
| ENSG00000178567 | EPM2AIP1      | 0,45  | 0,000209641 | 0,003675154 |
| ENSG00000260949 | KB-1836B5.1   | -1,26 | 0,000211533 | 0,003704966 |
| ENSG00000147118 | ZNF182        | 0,52  | 0,000211908 | 0,003708202 |
| ENSG00000261618 | RP11-79H23.3  | -1,05 | 0,000212311 | 0,003711901 |
| ENSG00000187889 | C1orf168      | 0,65  | 0,000213592 | 0,003730938 |
| ENSG00000180447 | GAS1          | 1,36  | 0,000213966 | 0,003734115 |
| ENSG00000134884 | ARGLU1        | 0,48  | 0,000216679 | 0,003778076 |
| ENSG00000117533 | VAMP4         | 0,54  | 0,000217073 | 0,003781556 |
| ENSG00000123999 | INHA          | 1,04  | 0,000217785 | 0,003790558 |
| ENSG00000120437 | ACAT2         | -0,52 | 0,000220848 | 0,003840426 |
| ENSG00000215142 | RP11-292B8.1  | 0,91  | 0,000222051 | 0,00385788  |
| ENSG00000189143 | CLDN4         | -0,55 | 0,00022316  | 0,003873688 |
| ENSG00000227885 | RP11-79N23.1  | 1,21  | 0,000223886 | 0,003882816 |
| ENSG00000164867 | NOS3          | -1,37 | 0,000224651 | 0,003892619 |
| ENSG00000226380 | MIR29A        | -0,98 | 0,000225742 | 0,003908024 |
| ENSG00000105516 | DBP           | 0,90  | 0,000227852 | 0,003937542 |
| ENSG00000213430 | HSPD1P1       | -0,53 | 0,000227841 | 0,003937542 |
| ENSG00000108465 | CDK5RAP3      | 0,34  | 0,000228403 | 0,003943553 |
| ENSG00000066382 | MPPED2        | 1,30  | 0,000228649 | 0,003944294 |
| ENSG00000137747 | TMPRSS13      | 0,68  | 0,000229885 | 0,0039621   |
| ENSG00000188211 | NCR3LG1       | -1,07 | 0,000231104 | 0,003979584 |
| ENSG00000106868 | SUSD1         | -0,92 | 0,000232481 | 0,003996851 |
| ENSG00000123933 | MXD4          | 0,55  | 0,000232519 | 0,003996851 |
| ENSG00000138756 | BMP2K         | -0,44 | 0,000234275 | 0,004023481 |
| ENSG00000075391 | RASAL2        | -0,44 | 0,000235982 | 0,00404564  |
| ENSG00000138356 | AOX1          | -1,31 | 0,000235926 | 0,00404564  |
| ENSG00000049283 | EPN3          | 0,64  | 0,000237055 | 0,004058314 |
| ENSG00000108679 | LGALS3BP      | 0,46  | 0,000237139 | 0,004058314 |
| ENSG00000187244 | BCAM          | 1,12  | 0,000240786 | 0,004117103 |
| ENSG00000073910 | FRY           | 0,85  | 0,000243756 | 0,004164224 |
| ENSG00000265460 | RP11-690G19.4 | 1,35  | 0,000244148 | 0,004167243 |
| ENSG00000172830 | SSH3          | 0,59  | 0,000245564 | 0,004187731 |
| ENSG00000140853 | NLRC5         | -0,59 | 0,000245809 | 0,004188248 |
| ENSG00000130340 | SNX9          | -0,41 | 0,000246683 | 0,004199448 |

|                 |               |       |             |             |
|-----------------|---------------|-------|-------------|-------------|
| ENSG00000196355 | AC021860.1    | 1,25  | 0,000247324 | 0,004206668 |
| ENSG00000164010 | ERMAP         | 0,44  | 0,000248015 | 0,004214739 |
| ENSG00000057019 | DCBLD2        | -0,52 | 0,000249374 | 0,00423413  |
| ENSG00000149557 | FEZ1          | -1,21 | 0,000249836 | 0,004238266 |
| ENSG00000215012 | C22orf29      | 0,40  | 0,000250881 | 0,004252276 |
| ENSG00000151835 | SACS          | -0,66 | 0,000253126 | 0,004286595 |
| ENSG00000176597 | B3GNT5        | -0,55 | 0,000258225 | 0,004369129 |
| ENSG00000117266 | CDK18         | 0,75  | 0,000262117 | 0,004423422 |
| ENSG00000146477 | SLC22A3       | -1,23 | 0,000262044 | 0,004423422 |
| ENSG00000174886 | NDUFA11       | 0,61  | 0,000261749 | 0,004423422 |
| ENSG00000187954 | CYHR1         | 0,45  | 0,00026275  | 0,004430256 |
| ENSG00000164611 | PTTG1         | 0,87  | 0,00026362  | 0,004441067 |
| ENSG00000167157 | PRRX2         | -1,29 | 0,000264072 | 0,004444836 |
| ENSG00000105649 | RAB3A         | 0,84  | 0,000264894 | 0,004454808 |
| ENSG00000204304 | PBX2          | 0,60  | 0,000265879 | 0,004467502 |
| ENSG00000163629 | PTPN13        | 0,54  | 0,000266958 | 0,004481756 |
| ENSG00000213347 | MXD3          | 0,62  | 0,000271997 | 0,004562405 |
| ENSG00000095752 | IL11          | -1,20 | 0,000272919 | 0,004573927 |
| ENSG00000163814 | CDCP1         | -0,69 | 0,000276135 | 0,00462384  |
| ENSG00000180855 | ZNF443        | 0,75  | 0,000277089 | 0,004635813 |
| ENSG00000154640 | BTG3          | -0,56 | 0,000277882 | 0,004645074 |
| ENSG00000110203 | FOLR3         | -1,36 | 0,000278292 | 0,004647936 |
| ENSG00000232187 | FTH1P7        | -0,77 | 0,000279312 | 0,004660959 |
| ENSG00000170322 | NFRKB         | 0,43  | 0,000279757 | 0,004664372 |
| ENSG00000198246 | SLC29A3       | -0,63 | 0,000281422 | 0,004688113 |
| ENSG00000165410 | CFL2          | -0,59 | 0,000281786 | 0,004690152 |
| ENSG00000253522 | MIR146A       | -1,29 | 0,000282859 | 0,004703981 |
| ENSG00000173166 | RAPH1         | -0,49 | 0,000285272 | 0,004740056 |
| ENSG00000128294 | TPST2         | -0,47 | 0,000285955 | 0,004747342 |
| ENSG00000083312 | TNPO1         | -0,36 | 0,000286474 | 0,004751901 |
| ENSG00000169067 | ACTBL2        | -1,28 | 0,000286958 | 0,004755861 |
| ENSG00000162065 | TBC1D24       | 0,55  | 0,00028854  | 0,004778013 |
| ENSG00000145901 | TNIP1         | -0,67 | 0,000290945 | 0,004810147 |
| ENSG00000249592 | RP11-440L14.1 | 0,64  | 0,000290976 | 0,004810147 |
| ENSG00000184995 | IFNE          | 0,76  | 0,000291813 | 0,004815789 |
| ENSG00000214548 | MEG3          | -1,37 | 0,000291716 | 0,004815789 |
| ENSG00000245849 | RAD51-AS1     | 0,58  | 0,000292346 | 0,004820478 |
| ENSG00000139613 | SMARCC2       | 0,38  | 0,000295856 | 0,004874219 |
| ENSG00000267194 | RP1-193H18.2  | 1,18  | 0,000297723 | 0,004900831 |
| ENSG00000111145 | ELK3          | -0,55 | 0,000300322 | 0,004939414 |
| ENSG00000104332 | SFRP1         | 1,06  | 0,000301953 | 0,004957238 |
| ENSG00000123143 | PKN1          | -0,61 | 0,000301997 | 0,004957238 |
| ENSG00000135414 | GDF11         | 0,59  | 0,000302171 | 0,004957238 |
| ENSG00000180113 | TDRD6         | 0,84  | 0,000306025 | 0,00501622  |

|                 |                |       |             |             |
|-----------------|----------------|-------|-------------|-------------|
| ENSG00000099625 | C19orf26       | -1,10 | 0,000307318 | 0,005033179 |
| ENSG00000186480 | INSIG1         | -0,55 | 0,00030781  | 0,005036978 |
| ENSG00000185518 | SV2B           | -1,36 | 0,000308385 | 0,005042141 |
| ENSG00000166401 | SERPINB8       | -0,61 | 0,000309566 | 0,005057195 |
| ENSG00000138031 | ADCY3          | -0,70 | 0,000311965 | 0,005092105 |
| ENSG00000146733 | PSPH           | -0,61 | 0,000315814 | 0,00515061  |
| ENSG00000106366 | SERPINE1       | -1,24 | 0,000324297 | 0,005284517 |
| ENSG00000148773 | MKI67          | 1,01  | 0,000324952 | 0,005290747 |
| ENSG00000154265 | ABCA5          | 0,56  | 0,000325985 | 0,005303119 |
| ENSG00000175287 | PHYHD1         | 1,05  | 0,00033036  | 0,005365306 |
| ENSG00000236829 | Z97634.3       | 1,00  | 0,000330088 | 0,005365306 |
| ENSG00000131378 | RFTN1          | -0,71 | 0,000332768 | 0,005399897 |
| ENSG00000080819 | CPOX           | 0,55  | 0,000336175 | 0,005446097 |
| ENSG00000135926 | TMBIM1         | -0,52 | 0,000335932 | 0,005446097 |
| ENSG00000234420 | ZNF37BP        | 0,57  | 0,000337612 | 0,005464816 |
| ENSG00000111653 | ING4           | 0,44  | 0,000338318 | 0,005467132 |
| ENSG00000158186 | MRAS           | -0,88 | 0,000338077 | 0,005467132 |
| ENSG00000196189 | SEMA4A         | 0,62  | 0,000340635 | 0,005499996 |
| ENSG00000267688 | AC005262.2     | 0,90  | 0,000341645 | 0,005511721 |
| ENSG00000183876 | ARSI           | -1,34 | 0,000347378 | 0,005599559 |
| ENSG00000077809 | GTF2I          | 0,45  | 0,000348978 | 0,005617181 |
| ENSG00000173744 | AGFG1          | -0,43 | 0,000349049 | 0,005617181 |
| ENSG00000162849 | KIF26B         | -1,17 | 0,000349653 | 0,005622232 |
| ENSG00000214797 | RP11-1036E20.9 | 0,95  | 0,00035064  | 0,005633439 |
| ENSG00000164379 | FOXQ1          | 0,81  | 0,000353022 | 0,005667019 |
| ENSG00000187837 | HIST1H1C       | -0,71 | 0,000353738 | 0,005673833 |
| ENSG00000138834 | MAPK8IP3       | 0,48  | 0,00035622  | 0,005694836 |
| ENSG00000168395 | ING5           | 0,55  | 0,000355895 | 0,005694836 |
| ENSG00000188910 | GJB3           | -0,59 | 0,00035549  | 0,005694836 |
| ENSG00000198563 | DDX39B         | 0,45  | 0,000356116 | 0,005694836 |
| ENSG00000272630 | RP11-344N10.5  | 1,13  | 0,000359137 | 0,005736738 |
| ENSG00000181649 | PHLDA2         | -0,77 | 0,000359635 | 0,005739976 |
| ENSG00000146938 | NLGN4X         | 1,29  | 0,000361127 | 0,005759064 |
| ENSG00000066279 | ASPM           | 0,89  | 0,000361881 | 0,005766345 |
| ENSG00000161638 | ITGA5          | -0,75 | 0,000362786 | 0,005769065 |
| ENSG00000242294 | STAG3L5P       | 0,71  | 0,000362935 | 0,005769065 |
| ENSG00000245680 | ZNF585B        | 0,62  | 0,000362943 | 0,005769065 |
| ENSG00000234329 | RP11-767N6.2   | 0,98  | 0,000364329 | 0,005786362 |
| ENSG00000182810 | DDX28          | -0,49 | 0,000366931 | 0,005822936 |
| ENSG00000109929 | SC5D           | -0,63 | 0,00036815  | 0,005831211 |
| ENSG00000134755 | DSC2           | -1,08 | 0,000368353 | 0,005831211 |
| ENSG00000138660 | AP1AR          | -0,53 | 0,000368341 | 0,005831211 |
| ENSG00000149485 | FADS1          | -0,81 | 0,000370643 | 0,005862687 |
| ENSG00000185033 | SEMA4B         | 0,60  | 0,000371526 | 0,005871865 |

|                 |               |       |             |             |
|-----------------|---------------|-------|-------------|-------------|
| ENSG00000135828 | RNASEL        | 0,67  | 0,000374441 | 0,005913129 |
| ENSG00000141655 | TNFRSF11A     | 0,48  | 0,000374947 | 0,005916303 |
| ENSG00000106089 | STX1A         | -0,55 | 0,000376385 | 0,005924311 |
| ENSG00000111319 | SCNN1A        | 0,46  | 0,000376092 | 0,005924311 |
| ENSG00000153179 | RASSF3        | -0,54 | 0,000375996 | 0,005924311 |
| ENSG00000242574 | HLA-DMB       | -0,93 | 0,000376674 | 0,005924311 |
| ENSG00000085231 | TAF9          | -0,42 | 0,000379026 | 0,005956481 |
| ENSG00000088826 | SMOX          | -0,86 | 0,000381002 | 0,005977858 |
| ENSG00000105650 | PDE4C         | 1,29  | 0,000380817 | 0,005977858 |
| ENSG00000197265 | GTF2E2        | -0,48 | 0,000384936 | 0,006034704 |
| ENSG00000146535 | GNA12         | -0,65 | 0,000385565 | 0,006039696 |
| ENSG00000112096 | SOD2          | -0,97 | 0,000387486 | 0,006064885 |
| ENSG00000168970 | JMJD7-PLA2G4B | 0,76  | 0,000388137 | 0,00607018  |
| ENSG00000139679 | LPAR6         | 0,72  | 0,00038969  | 0,006089566 |
| ENSG00000198455 | ZXDB          | -0,59 | 0,000390505 | 0,006097395 |
| ENSG00000171462 | DLK2          | 1,16  | 0,000394127 | 0,00614902  |
| ENSG00000167306 | MYO5B         | -0,56 | 0,000398326 | 0,006209542 |
| ENSG00000213889 | PPM1N         | 1,22  | 0,000398863 | 0,006212929 |
| ENSG00000077092 | RARB          | 0,56  | 0,000399334 | 0,006213875 |
| ENSG00000091986 | CCDC80        | 0,85  | 0,000399564 | 0,006213875 |
| ENSG00000147573 | TRIM55        | -1,18 | 0,000403562 | 0,006271027 |
| ENSG00000163728 | TTC14         | 0,45  | 0,000405862 | 0,006301725 |
| ENSG00000001630 | CYP51A1       | -0,60 | 0,000413129 | 0,006409447 |
| ENSG00000132481 | TRIM47        | -0,82 | 0,000415089 | 0,006434707 |
| ENSG00000123240 | OPTN          | -0,68 | 0,000417978 | 0,006474328 |
| ENSG00000138760 | SCARB2        | -0,40 | 0,000418942 | 0,006484093 |
| ENSG00000151967 | SCHIP1        | -0,98 | 0,000421704 | 0,006521633 |
| ENSG00000142409 | ZNF787        | -0,49 | 0,000423055 | 0,006537325 |
| ENSG00000150457 | LATS2         | -0,67 | 0,000423982 | 0,006546448 |
| ENSG00000259663 | CTD-2314G24.2 | 0,98  | 0,000426323 | 0,006577359 |
| ENSG00000225285 | RP4-758J18.10 | 1,09  | 0,000426736 | 0,006578509 |
| ENSG00000104689 | TNFRSF10A     | -0,79 | 0,000427373 | 0,006583097 |
| ENSG00000088881 | EBF4          | 0,55  | 0,000428519 | 0,006595523 |
| ENSG00000174156 | GSTA3         | -1,33 | 0,00043018  | 0,00661585  |
| ENSG00000141959 | PFKL          | 0,40  | 0,000430869 | 0,006616501 |
| ENSG00000180198 | RCC1          | -0,50 | 0,000430904 | 0,006616501 |
| ENSG00000170802 | FOXN2         | -0,49 | 0,000435643 | 0,006674657 |
| ENSG00000173918 | C1QTNF1       | -1,17 | 0,000435722 | 0,006674657 |
| ENSG00000249684 | RP11-423H2.3  | 1,16  | 0,00043532  | 0,006674657 |
| ENSG00000182752 | PAPPA         | -1,28 | 0,000436166 | 0,006676185 |
| ENSG00000141401 | IMPA2         | 0,73  | 0,000439351 | 0,00671436  |
| ENSG00000173531 | MST1          | 0,52  | 0,000439019 | 0,00671436  |
| ENSG00000179583 | CIITA         | -0,59 | 0,000439729 | 0,006714859 |
| ENSG00000123395 | C12orf44      | -0,43 | 0,000441634 | 0,006738642 |

|                 |               |       |             |             |
|-----------------|---------------|-------|-------------|-------------|
| ENSG00000111799 | COL12A1       | -1,15 | 0,000444333 | 0,006774505 |
| ENSG00000188042 | ARL4C         | -0,80 | 0,000444683 | 0,006774524 |
| ENSG00000108256 | NUFIP2        | 0,35  | 0,000445238 | 0,006777664 |
| ENSG00000012171 | SEMA3B        | 0,72  | 0,000449608 | 0,006835628 |
| ENSG00000064989 | CALCRL        | 0,88  | 0,000449749 | 0,006835628 |
| ENSG00000065057 | NTHL1         | 0,67  | 0,000452081 | 0,0068657   |
| ENSG00000237330 | RNF223        | -0,88 | 0,0004554   | 0,006910691 |
| ENSG00000205420 | KRT6A         | -1,01 | 0,000455909 | 0,006913025 |
| ENSG00000133858 | ZFC3H1        | 0,42  | 0,000458458 | 0,006940832 |
| ENSG00000143842 | SOX13         | 0,55  | 0,00045822  | 0,006940832 |
| ENSG00000119943 | PYROXD2       | 0,68  | 0,000459012 | 0,006943807 |
| ENSG00000168300 | PCMTD1        | 0,46  | 0,000460027 | 0,006953753 |
| ENSG00000256690 | RP11-727F15.9 | 1,24  | 0,000460682 | 0,006958239 |
| ENSG00000124391 | IL17C         | -1,32 | 0,000462462 | 0,006979689 |
| ENSG00000140575 | IQGAP1        | -0,35 | 0,000468373 | 0,007063416 |
| ENSG00000147130 | ZMYM3         | 0,50  | 0,000470896 | 0,00709596  |
| ENSG00000112299 | VNN1          | -1,04 | 0,000476229 | 0,007170747 |
| ENSG00000165792 | METTL17       | 0,46  | 0,000477575 | 0,007185445 |
| ENSG00000124575 | HIST1H1D      | -1,32 | 0,000479735 | 0,007212361 |
| ENSG00000106025 | TSPAN12       | 0,72  | 0,000481816 | 0,007238049 |
| ENSG00000110042 | DTX4          | 0,61  | 0,000484569 | 0,007272421 |
| ENSG00000140398 | NEIL1         | 0,63  | 0,000485341 | 0,007272421 |
| ENSG00000153046 | CDYL          | -0,60 | 0,000485602 | 0,007272421 |
| ENSG00000214765 | SEPT7P2       | 0,56  | 0,000485583 | 0,007272421 |
| ENSG00000050730 | TNIP3         | -1,32 | 0,000488129 | 0,007304637 |
| ENSG00000138668 | HNRNPD        | 0,47  | 0,000492793 | 0,007359138 |
| ENSG00000183317 | EPHA10        | -1,25 | 0,000492908 | 0,007359138 |
| ENSG00000213494 | CCL14         | -1,30 | 0,000492257 | 0,007359138 |
| ENSG00000140807 | NKD1          | 1,29  | 0,000493287 | 0,00735915  |
| ENSG00000057294 | PKP2          | -0,53 | 0,000496734 | 0,007396016 |
| ENSG00000151364 | KCTD14        | 0,84  | 0,000496785 | 0,007396016 |
| ENSG00000159640 | ACE           | 0,96  | 0,000496901 | 0,007396016 |
| ENSG00000162419 | GMEB1         | -0,45 | 0,000500706 | 0,007446948 |
| ENSG00000083307 | GRHL2         | 0,46  | 0,000502658 | 0,007465537 |
| ENSG00000114480 | GBE1          | -0,52 | 0,000502725 | 0,007465537 |
| ENSG00000123689 | GOS2          | -0,91 | 0,000506188 | 0,0075055   |
| ENSG00000179750 | APOBEC3B      | -1,02 | 0,000506008 | 0,0075055   |
| ENSG00000100304 | TTL12         | -0,44 | 0,000508175 | 0,007517739 |
| ENSG00000152229 | PSTPIP2       | -0,90 | 0,000507984 | 0,007517739 |
| ENSG00000177426 | TGIF1         | -0,38 | 0,000507858 | 0,007517739 |
| ENSG00000180626 | ZNF594        | 0,61  | 0,000509723 | 0,007534903 |
| ENSG00000247400 | DNAJC3-AS1    | 0,62  | 0,000511519 | 0,007555697 |
| ENSG00000138448 | ITGAV         | -0,88 | 0,000512483 | 0,007564188 |
| ENSG00000261005 | CTB-58E17.1   | 0,89  | 0,000516496 | 0,007617626 |

|                 |               |       |             |             |
|-----------------|---------------|-------|-------------|-------------|
| ENSG00000142632 | ARHGEF19      | 0,74  | 0,000519874 | 0,00766116  |
| ENSG00000159761 | C16orf86      | 0,97  | 0,000520236 | 0,00766116  |
| ENSG00000229512 | AC068580.5    | 0,95  | 0,000522244 | 0,007684906 |
| ENSG00000135636 | DYSF          | -1,02 | 0,000524198 | 0,00770782  |
| ENSG00000067334 | DNTTIP2       | -0,39 | 0,000526604 | 0,007725524 |
| ENSG00000183287 | CCBE1         | -1,27 | 0,000526993 | 0,007725524 |
| ENSG00000183765 | CHEK2         | 0,58  | 0,000526564 | 0,007725524 |
| ENSG00000266173 | STRADA        | 0,67  | 0,000526636 | 0,007725524 |
| ENSG00000213928 | IRF9          | 0,59  | 0,000527454 | 0,007726442 |
| ENSG00000028277 | POU2F2        | -1,11 | 0,000529012 | 0,007737597 |
| ENSG00000270189 | RP11-258C19.7 | 0,83  | 0,000528638 | 0,007737597 |
| ENSG00000132635 | PCED1A        | 0,54  | 0,000529746 | 0,007741107 |
| ENSG00000185485 | SDHAP1        | 0,82  | 0,000530049 | 0,007741107 |
| ENSG00000065029 | ZNF76         | 0,53  | 0,000530811 | 0,007746408 |
| ENSG00000152642 | GPD1L         | 0,51  | 0,000535265 | 0,007805539 |
| ENSG00000237515 | SHISA9        | -1,31 | 0,000537796 | 0,007836569 |
| ENSG00000125434 | SLC25A35      | 0,58  | 0,000547736 | 0,007963492 |
| ENSG00000161558 | TMEM143       | 0,73  | 0,00054766  | 0,007963492 |
| ENSG00000267370 | CTD-2623N2.3  | 0,87  | 0,00054745  | 0,007963492 |
| ENSG00000128000 | ZNF780B       | 0,52  | 0,000548251 | 0,007965019 |
| ENSG00000100526 | CDKN3         | 1,24  | 0,00054925  | 0,007973568 |
| ENSG00000196453 | ZNF777        | -0,47 | 0,00055055  | 0,007986466 |
| ENSG00000134198 | TSPAN2        | -1,13 | 0,000553384 | 0,008021585 |
| ENSG00000161920 | MED11         | 0,53  | 0,000560153 | 0,008113662 |
| ENSG00000188895 | MSL1          | 0,40  | 0,00056085  | 0,008117699 |
| ENSG00000273329 | RP11-448A19.1 | 0,73  | 0,000567698 | 0,008210694 |
| ENSG00000187735 | TCEA1         | -0,44 | 0,000570846 | 0,008250078 |
| ENSG00000171703 | TCEA2         | 0,50  | 0,000573649 | 0,008284425 |
| ENSG00000112343 | TRIM38        | 0,53  | 0,000575521 | 0,008305297 |
| ENSG00000168309 | FAM107A       | 1,08  | 0,00057836  | 0,008340059 |
| ENSG00000163602 | RYBP          | -0,39 | 0,000579107 | 0,00834464  |
| ENSG00000259562 | RP11-762H8.2  | 0,91  | 0,000580685 | 0,008361182 |
| ENSG00000249846 | RP11-77P16.4  | 0,87  | 0,000581429 | 0,008365694 |
| ENSG00000101361 | NOP56         | -0,41 | 0,000587011 | 0,008439743 |
| ENSG00000137177 | KIF13A        | -0,42 | 0,000592192 | 0,008501653 |
| ENSG00000138185 | ENTPD1        | 1,11  | 0,00059212  | 0,008501653 |
| ENSG00000197111 | PCBP2         | 0,47  | 0,000592962 | 0,008506428 |
| ENSG00000178607 | ERN1          | -0,49 | 0,000599093 | 0,008588027 |
| ENSG00000100364 | KIAA0930      | -0,48 | 0,000599997 | 0,008594652 |
| ENSG00000167302 | ENTHD2        | 0,56  | 0,000603937 | 0,00864471  |
| ENSG00000152503 | TRIM36        | -1,22 | 0,000604786 | 0,008650486 |
| ENSG00000100139 | MICALL1       | -0,68 | 0,000607308 | 0,008680172 |
| ENSG00000176842 | IRX5          | 0,59  | 0,000611439 | 0,008732785 |
| ENSG00000112699 | GMDS          | 0,65  | 0,000614026 | 0,008763299 |

|                 |              |       |             |             |
|-----------------|--------------|-------|-------------|-------------|
| ENSG00000072786 | STK10        | -0,64 | 0,000618235 | 0,008809072 |
| ENSG00000158050 | DUSP2        | -1,23 | 0,000618053 | 0,008809072 |
| ENSG00000229132 | EIF4A1P10    | -0,40 | 0,000618594 | 0,008809072 |
| ENSG00000120696 | KBTBD7       | 0,61  | 0,000619166 | 0,008810752 |
| ENSG00000166828 | SCNN1G       | 0,64  | 0,000625162 | 0,008889564 |
| ENSG00000119862 | LGALS1       | -0,74 | 0,000625946 | 0,008894199 |
| ENSG00000251593 | MSNP1        | -0,93 | 0,000628301 | 0,008921144 |
| ENSG00000165233 | C9orf89      | 0,57  | 0,000628839 | 0,008922255 |
| ENSG00000144468 | RHBDD1       | -0,46 | 0,000632999 | 0,008974728 |
| ENSG00000070882 | OSBPL3       | -0,43 | 0,000633773 | 0,008979142 |
| ENSG00000115421 | PAPOLG       | 0,39  | 0,000635684 | 0,008998369 |
| ENSG00000162738 | VANGL2       | 0,60  | 0,000636056 | 0,008998369 |
| ENSG00000175322 | ZNF519       | 0,82  | 0,00064266  | 0,00908518  |
| ENSG00000176046 | NUPR1        | -0,81 | 0,000645943 | 0,009124938 |
| ENSG00000233588 | CYP51A1P2    | -0,47 | 0,000648988 | 0,009161293 |
| ENSG00000213699 | SLC35F6      | -0,59 | 0,000653323 | 0,009215795 |
| ENSG00000029153 | ARNTL2       | -0,43 | 0,000653806 | 0,009215913 |
| ENSG00000170855 | TRIAP1       | -0,52 | 0,000655604 | 0,009234561 |
| ENSG00000196220 | SRGAP3       | 0,80  | 0,000665227 | 0,009363309 |
| ENSG00000139433 | GLTP         | 0,42  | 0,000665925 | 0,009366355 |
| ENSG00000115657 | ABCB6        | 0,89  | 0,000668233 | 0,009389387 |
| ENSG00000129990 | SYT5         | -1,14 | 0,00066853  | 0,009389387 |
| ENSG00000149256 | TENM4        | -0,42 | 0,000671494 | 0,009424205 |
| ENSG00000169047 | IRS1         | -0,40 | 0,00067444  | 0,009458714 |
| ENSG00000091527 | CDV3         | -0,50 | 0,000679333 | 0,009508216 |
| ENSG00000124549 | BTN2A3P      | 0,80  | 0,000678863 | 0,009508216 |
| ENSG00000224531 | SMIM13       | -0,51 | 0,000679438 | 0,009508216 |
| ENSG00000108602 | ALDH3A1      | 1,14  | 0,000682799 | 0,009537318 |
| ENSG00000168385 | sep-02       | 0,30  | 0,000682991 | 0,009537318 |
| ENSG00000170485 | NPAS2        | -0,72 | 0,000682246 | 0,009537318 |
| ENSG00000175166 | PSMD2        | -0,33 | 0,000686598 | 0,009580807 |
| ENSG00000099364 | FBXL19       | 0,39  | 0,000689341 | 0,009612179 |
| ENSG00000214357 | NEURL1B      | -0,89 | 0,000691005 | 0,00962846  |
| ENSG00000167553 | TUBA1C       | -0,61 | 0,000691932 | 0,009634474 |
| ENSG00000160094 | ZNF362       | 0,51  | 0,00070397  | 0,009795065 |
| ENSG00000134222 | PSRC1        | 0,96  | 0,000706647 | 0,009825277 |
| ENSG00000104313 | EYA1         | 0,59  | 0,000708365 | 0,009842115 |
| ENSG00000171817 | ZNF540       | 1,02  | 0,000709581 | 0,009851973 |
| ENSG00000235501 | RP4-639F20.1 | 0,73  | 0,000710209 | 0,009853638 |
| ENSG00000137880 | GCHFR        | 0,63  | 0,000714078 | 0,009900247 |
| ENSG00000168243 | GNG4         | 1,24  | 0,000714914 | 0,009901749 |
| ENSG00000169562 | GJB1         | 1,14  | 0,000715206 | 0,009901749 |
| ENSG00000142733 | MAP3K6       | 0,60  | 0,000717084 | 0,009920685 |
| ENSG00000226779 | NAALADL2-AS2 | -1,28 | 0,000723201 | 0,009998183 |



|                 |              |       |             |             |
|-----------------|--------------|-------|-------------|-------------|
| ENSG00000101187 | SLCO4A1      | -1,26 | 0,000724752 | 0,010012512 |
| ENSG00000115091 | ACTR3        | -0,46 | 0,000729818 | 0,010075327 |
| ENSG00000197838 | CYP2A13      | 1,13  | 0,000731519 | 0,010091639 |
| ENSG00000262484 | CCER2        | 1,22  | 0,000740783 | 0,010212188 |
| ENSG00000271270 | TMCC1-AS1    | 0,91  | 0,000742349 | 0,010226515 |
| ENSG00000011243 | AKAP8L       | 0,41  | 0,000742999 | 0,010228216 |
| ENSG00000186377 | CYP4X1       | 0,74  | 0,000746597 | 0,010270468 |
| ENSG00000177133 | LINC00982    | 0,91  | 0,000747327 | 0,010273229 |
| ENSG00000068078 | FGFR3        | 1,10  | 0,000748444 | 0,010274509 |
| ENSG00000183513 | COA5         | 0,45  | 0,000748478 | 0,010274509 |
| ENSG00000138767 | CNOT6L       | 0,39  | 0,000756011 | 0,010363276 |
| ENSG00000175265 | GOLGA8A      | 0,69  | 0,000755574 | 0,010363276 |
| ENSG00000149499 | EML3         | 0,53  | 0,000770222 | 0,010550623 |
| ENSG00000123427 | METTL21B     | 0,58  | 0,000771283 | 0,010557716 |
| ENSG00000064300 | NGFR         | 1,08  | 0,000779887 | 0,010667977 |
| ENSG00000133985 | TTC9         | -0,55 | 0,000785602 | 0,010733865 |
| ENSG00000175416 | CLTB         | -0,64 | 0,000785809 | 0,010733865 |
| ENSG00000136161 | RCBTB2       | 0,63  | 0,00078864  | 0,010759523 |
| ENSG00000196670 | ZFP62        | 0,42  | 0,000788795 | 0,010759523 |
| ENSG00000128563 | PRKRIP1      | 0,48  | 0,000791887 | 0,010794116 |
| ENSG00000151748 | SAV1         | -0,50 | 0,000794881 | 0,010827326 |
| ENSG00000128606 | LRRC17       | 1,19  | 0,000796487 | 0,010841604 |
| ENSG00000110851 | PRDM4        | -0,48 | 0,000801818 | 0,010906525 |
| ENSG00000158246 | FAM46B       | -0,68 | 0,000803934 | 0,010920418 |
| ENSG00000163870 | TPRA1        | -0,57 | 0,000803964 | 0,010920418 |
| ENSG00000146067 | FAM193B      | 0,33  | 0,000806024 | 0,010940743 |
| ENSG00000197165 | SULT1A2      | 0,54  | 0,000810826 | 0,010998243 |
| ENSG00000139793 | MBNL2        | -0,55 | 0,00081286  | 0,011018137 |
| ENSG00000107968 | MAP3K8       | -0,63 | 0,000819035 | 0,011094092 |
| ENSG00000072422 | RHOBTB1      | -0,53 | 0,000820399 | 0,011104823 |
| ENSG00000102221 | JADE3        | -0,41 | 0,000824824 | 0,011156945 |
| ENSG00000139269 | INHBE        | -1,25 | 0,000825695 | 0,011160959 |
| ENSG00000100836 | PABPN1       | 0,59  | 0,000828796 | 0,011189528 |
| ENSG00000104365 | IKKBK        | 0,36  | 0,000828961 | 0,011189528 |
| ENSG00000111845 | PAK1IP1      | -0,51 | 0,000830535 | 0,011201695 |
| ENSG00000129282 | MRM1         | 0,54  | 0,000831486 | 0,011201695 |
| ENSG00000204531 | POU5F1       | 1,02  | 0,000831592 | 0,011201695 |
| ENSG00000152487 | ARL5B-AS1    | 1,03  | 0,000833128 | 0,011214612 |
| ENSG00000108848 | LUC7L3       | 0,37  | 0,000839397 | 0,011289763 |
| ENSG00000167964 | RAB26        | 0,98  | 0,000840455 | 0,011289763 |
| ENSG00000204219 | TCEA3        | 0,64  | 0,00084016  | 0,011289763 |
| ENSG00000168405 | CMAHP        | 0,90  | 0,000841127 | 0,011290978 |
| ENSG00000260336 | RP11-395B7.7 | 0,50  | 0,000842145 | 0,011296839 |
| ENSG00000116754 | SRSF11       | 0,42  | 0,000845012 | 0,011327473 |

|                 |               |       |             |             |
|-----------------|---------------|-------|-------------|-------------|
| ENSG00000139531 | SUOX          | 0,59  | 0,000845908 | 0,011331669 |
| ENSG00000272016 | RP11-215G15.5 | -1,26 | 0,000846561 | 0,011332605 |
| ENSG00000182782 | HCAR2         | 0,75  | 0,000850286 | 0,011374629 |
| ENSG00000078369 | GNB1          | -0,36 | 0,000854434 | 0,011398713 |
| ENSG00000139567 | ACVRL1        | -1,24 | 0,000853386 | 0,011398713 |
| ENSG00000181444 | ZNF467        | 0,66  | 0,000853215 | 0,011398713 |
| ENSG00000182793 | GSTA5         | 1,26  | 0,000854002 | 0,011398713 |
| ENSG00000203880 | PCMTD2        | 0,46  | 0,000861645 | 0,011487024 |
| ENSG00000147251 | DOCK11        | -0,87 | 0,000863419 | 0,011502775 |
| ENSG00000128016 | ZFP36         | -0,33 | 0,000866112 | 0,01153075  |
| ENSG00000196344 | ADH7          | 1,17  | 0,000869044 | 0,01156186  |
| ENSG00000115652 | UXS1          | -0,67 | 0,000869951 | 0,011565996 |
| ENSG00000222047 | C10orf55      | -1,25 | 0,000874275 | 0,011615539 |
| ENSG00000231711 | LINC00899     | 0,80  | 0,000875745 | 0,011627123 |
| ENSG00000111726 | CMAS          | 0,42  | 0,000879336 | 0,011658857 |
| ENSG00000174799 | CEP135        | -0,58 | 0,000879269 | 0,011658857 |
| ENSG00000136167 | LCP1          | -1,10 | 0,000888502 | 0,011772353 |
| ENSG00000113575 | PPP2CA        | -0,40 | 0,000893471 | 0,011830123 |
| ENSG00000120729 | MYOT          | 1,23  | 0,000896146 | 0,011857457 |
| ENSG00000164236 | ANKRD33B      | -1,18 | 0,000896928 | 0,011859722 |
| ENSG00000260400 | RP11-119F7.5  | 1,25  | 0,000899933 | 0,011891363 |
| ENSG00000125999 | BPIFB1        | 0,83  | 0,000904767 | 0,011947109 |
| ENSG00000136051 | KIAA1033      | -0,43 | 0,000907472 | 0,011966554 |
| ENSG00000143320 | CRABP2        | 0,91  | 0,000907009 | 0,011966554 |
| ENSG00000146054 | TRIM7         | 0,86  | 0,000908806 | 0,011976013 |
| ENSG00000117009 | KMO           | -1,25 | 0,000910082 | 0,011984698 |
| ENSG00000170949 | ZNF160        | 0,64  | 0,000911014 | 0,011988843 |
| ENSG00000148180 | GSN           | 0,42  | 0,000912685 | 0,012002704 |
| ENSG00000154889 | MPPE1         | 0,44  | 0,000915537 | 0,012028092 |
| ENSG00000239149 | SNORA59A      | 0,73  | 0,000915854 | 0,012028092 |
| ENSG00000198742 | SMURF1        | -0,38 | 0,000916578 | 0,012029462 |
| ENSG00000178295 | GEN1          | 0,45  | 0,000920216 | 0,012062985 |
| ENSG00000185122 | HSF1          | -0,37 | 0,000920374 | 0,012062985 |
| ENSG00000106479 | ZNF862        | 0,44  | 0,00092258  | 0,012083744 |
| ENSG00000138378 | STAT4         | -0,84 | 0,000925092 | 0,01210848  |
| ENSG00000144381 | HSPD1         | -0,48 | 0,000927743 | 0,012126836 |
| ENSG00000169247 | SH3TC2        | -0,86 | 0,000927723 | 0,012126836 |
| ENSG00000185186 | LINC00313     | -1,24 | 0,000928665 | 0,012130719 |
| ENSG00000134775 | FHOD3         | -0,85 | 0,000929681 | 0,012135839 |
| ENSG00000163735 | CXCL5         | -1,24 | 0,000930833 | 0,012142714 |
| ENSG00000197343 | ZNF655        | 0,56  | 0,000939468 | 0,012247133 |
| ENSG00000131051 | RBM39         | 0,38  | 0,000941047 | 0,012259489 |
| ENSG00000167196 | FBXO22        | -0,41 | 0,000944747 | 0,01229944  |
| ENSG00000204682 | CASC10        | -1,05 | 0,000948764 | 0,012343466 |

|                 |                |       |             |             |
|-----------------|----------------|-------|-------------|-------------|
| ENSG00000158825 | CDA            | -1,23 | 0,00095425  | 0,012406531 |
| ENSG00000117632 | STMN1          | -0,83 | 0,000956649 | 0,012409872 |
| ENSG00000148175 | STOM           | -0,55 | 0,000956876 | 0,012409872 |
| ENSG00000164975 | SNAPC3         | 0,46  | 0,000957063 | 0,012409872 |
| ENSG00000226549 | SCDP1          | -0,94 | 0,000956159 | 0,012409872 |
| ENSG00000173442 | EHBP1L1        | 0,51  | 0,000957913 | 0,012412607 |
| ENSG00000163013 | FBXO41         | 0,53  | 0,00096009  | 0,012424963 |
| ENSG00000262712 | RP11-295D4.1   | -1,14 | 0,000960146 | 0,012424963 |
| ENSG00000107882 | SUFU           | 0,36  | 0,000965969 | 0,012491997 |
| ENSG00000178568 | ERBB4          | 0,80  | 0,000969993 | 0,012535686 |
| ENSG00000130559 | CAMSAP1        | -0,65 | 0,00097069  | 0,01253636  |
| ENSG00000198788 | MUC2           | 1,16  | 0,000977533 | 0,01261634  |
| ENSG00000026297 | RNASSET2       | 0,63  | 0,000980701 | 0,012648833 |
| ENSG00000138131 | LOXL4          | 0,80  | 0,000983313 | 0,012674097 |
| ENSG00000170962 | PDGFD          | 0,95  | 0,000985703 | 0,012696479 |
| ENSG00000251369 | ZNF550         | 0,54  | 0,000986362 | 0,012696557 |
| ENSG00000149948 | HMGA2          | -0,92 | 0,000987885 | 0,012707739 |
| ENSG00000164199 | GPR98          | 0,75  | 0,000993475 | 0,012754746 |
| ENSG00000167723 | TRPV3          | -1,24 | 0,00099351  | 0,012754746 |
| ENSG00000257829 | RP11-845M18.6  | -1,17 | 0,000992855 | 0,012754746 |
| ENSG00000197409 | HIST1H3D       | -1,16 | 0,000997439 | 0,012796738 |
| ENSG00000198888 | MT-ND1         | -0,67 | 0,000998604 | 0,01280322  |
| ENSG00000145911 | N4BP3          | -0,75 | 0,001004796 | 0,01287411  |
| ENSG00000073849 | ST6GAL1        | 0,62  | 0,001005802 | 0,012878504 |
| ENSG00000168078 | PBK            | 0,91  | 0,001012405 | 0,012954519 |
| ENSG00000128159 | TUBGCP6        | 0,38  | 0,001014254 | 0,012969633 |
| ENSG00000254732 | RP11-691N7.6   | 0,95  | 0,001026139 | 0,013112979 |
| ENSG00000146192 | FGD2           | 0,60  | 0,001030348 | 0,0131581   |
| ENSG00000125355 | TMEM255A       | -1,22 | 0,00103171  | 0,013166841 |
| ENSG00000149150 | SLC43A1        | -1,14 | 0,001033823 | 0,013185151 |
| ENSG00000187079 | TEAD1          | -0,48 | 0,001038102 | 0,013231035 |
| ENSG00000244627 | RP3-449O17.1   | 0,62  | 0,001049603 | 0,013368844 |
| ENSG00000183508 | FAM46C         | 0,93  | 0,001052241 | 0,013393668 |
| ENSG00000164951 | PDP1           | -0,72 | 0,001053837 | 0,013405187 |
| ENSG00000165275 | TRMT10B        | 0,53  | 0,001055656 | 0,013419542 |
| ENSG00000255080 | RP11-1082L8.3  | 1,19  | 0,001069738 | 0,013580774 |
| ENSG00000258839 | MC1R           | 0,65  | 0,001069529 | 0,013580774 |
| ENSG00000143502 | SUSD4          | 0,72  | 0,001071603 | 0,013595574 |
| ENSG00000113716 | HMGXB3         | -0,37 | 0,001073414 | 0,013609662 |
| ENSG00000011523 | CEP68          | 0,53  | 0,001075688 | 0,013629585 |
| ENSG00000259865 | RP11-488L18.10 | 0,53  | 0,001076762 | 0,013634306 |
| ENSG00000103043 | VAC14          | -0,41 | 0,001077638 | 0,013636511 |
| ENSG00000234685 | NUS1P2         | 1,01  | 0,001081335 | 0,013674388 |
| ENSG00000163216 | SPRR2D         | -1,23 | 0,00109575  | 0,01384766  |

|                 |              |       |             |             |
|-----------------|--------------|-------|-------------|-------------|
| ENSG00000197506 | SLC28A3      | -0,94 | 0,001096998 | 0,013854414 |
| ENSG00000185813 | PCYT2        | -0,55 | 0,001098088 | 0,013859169 |
| ENSG00000225663 | FAM195B      | -0,64 | 0,001101617 | 0,013894675 |
| ENSG00000182795 | C1orf116     | 0,38  | 0,001104313 | 0,013902092 |
| ENSG00000213139 | CRYGS        | 0,67  | 0,001104161 | 0,013902092 |
| ENSG00000232725 | U52111.14    | 1,22  | 0,001104352 | 0,013902092 |
| ENSG00000120833 | SOCS2        | -0,92 | 0,001113453 | 0,013999918 |
| ENSG00000214376 | VSTM5        | 0,87  | 0,001113564 | 0,013999918 |
| ENSG00000002726 | AOC1         | 1,06  | 0,001116477 | 0,014022285 |
| ENSG00000035115 | SH3YL1       | 0,47  | 0,001117509 | 0,014022285 |
| ENSG00000225241 | RP11-640M9.2 | 0,53  | 0,001116853 | 0,014022285 |
| ENSG00000113916 | BCL6         | 0,58  | 0,001120355 | 0,014048918 |
| ENSG00000111665 | CDCA3        | 0,80  | 0,001122376 | 0,014065183 |
| ENSG00000070778 | PTPN21       | -0,40 | 0,00112331  | 0,014067806 |
| ENSG00000171208 | NETO2        | -0,38 | 0,001131256 | 0,01415819  |
| ENSG00000204271 | SPIN3        | 0,62  | 0,001132694 | 0,014167065 |
| ENSG00000141480 | ARRB2        | 0,70  | 0,001133472 | 0,014167673 |
| ENSG00000129474 | AJUBA        | -0,68 | 0,001136395 | 0,014185949 |
| ENSG00000197070 | ARRDC1       | 0,32  | 0,001136148 | 0,014185949 |
| ENSG00000188869 | TMC3         | -1,21 | 0,001139264 | 0,014212627 |
| ENSG00000152784 | PRDM8        | 0,75  | 0,001140295 | 0,014216365 |
| ENSG00000025708 | TYMP         | -0,76 | 0,001143284 | 0,014244487 |
| ENSG00000104960 | PTOV1        | 0,41  | 0,001145348 | 0,014261056 |
| ENSG00000148229 | POLE3        | -0,48 | 0,00114984  | 0,014307813 |
| ENSG00000108395 | TRIM37       | -0,38 | 0,001154418 | 0,014355584 |
| ENSG00000068724 | TTC7A        | -0,62 | 0,001158629 | 0,01439873  |
| ENSG00000018510 | AGPS         | -0,52 | 0,001159773 | 0,014403731 |
| ENSG00000245532 | NEAT1        | 0,58  | 0,001162016 | 0,014422362 |
| ENSG00000134897 | BIVM         | 0,48  | 0,001170868 | 0,014520736 |
| ENSG00000243943 | ZNF512       | 0,48  | 0,001171437 | 0,014520736 |
| ENSG00000082701 | GSK3B        | -0,34 | 0,00118068  | 0,014607341 |
| ENSG00000104361 | NIPAL2       | 0,58  | 0,001180515 | 0,014607341 |
| ENSG00000117507 | FMO6P        | 0,71  | 0,001179439 | 0,014607341 |
| ENSG00000101311 | FERMT1       | -0,79 | 0,001183308 | 0,014629723 |
| ENSG00000197535 | MYO5A        | -0,51 | 0,001183995 | 0,014629723 |
| ENSG00000127603 | MACF1        | -0,38 | 0,001184765 | 0,014629928 |
| ENSG00000234444 | ZNF736       | 0,44  | 0,001186251 | 0,014638975 |
| ENSG00000163171 | CDC42EP3     | -0,58 | 0,001197691 | 0,01477076  |
| ENSG00000106009 | BRAT1        | 0,46  | 0,001203819 | 0,014830876 |
| ENSG00000138709 | LARP1B       | -0,48 | 0,001204092 | 0,014830876 |
| ENSG00000114812 | VIPR1        | 0,64  | 0,001209548 | 0,014869781 |
| ENSG00000162631 | NTNG1        | -1,14 | 0,001208915 | 0,014869781 |
| ENSG00000166478 | ZNF143       | -0,49 | 0,001209269 | 0,014869781 |
| ENSG00000176532 | PRR15        | 0,67  | 0,00121265  | 0,014889069 |

|                 |               |       |             |             |
|-----------------|---------------|-------|-------------|-------------|
| ENSG00000196295 | AC005154.6    | 0,51  | 0,001212309 | 0,014889069 |
| ENSG00000179046 | TRIML2        | -1,16 | 0,001219219 | 0,014960273 |
| ENSG00000118785 | SPP1          | 1,12  | 0,001226347 | 0,01503824  |
| ENSG00000143882 | ATP6V1C2      | 1,00  | 0,001231849 | 0,01509618  |
| ENSG00000164695 | CHMP4C        | -0,48 | 0,001240862 | 0,015197042 |
| ENSG00000133398 | MED10         | -0,39 | 0,001243767 | 0,015213436 |
| ENSG00000175906 | ARL4D         | 0,64  | 0,001243084 | 0,015213436 |
| ENSG00000173611 | SCAI          | 0,62  | 0,001245522 | 0,015225312 |
| ENSG00000239948 | RN7SL368P     | -1,22 | 0,001248512 | 0,015252264 |
| ENSG00000089159 | PXN           | -0,31 | 0,001254172 | 0,015311776 |
| ENSG00000198835 | GJC2          | 1,09  | 0,001256528 | 0,015330904 |
| ENSG00000108829 | LRRC59        | -0,37 | 0,001267203 | 0,015441745 |
| ENSG00000136738 | STAM          | -0,46 | 0,001266949 | 0,015441745 |
| ENSG00000073146 | MOV10L1       | -1,19 | 0,001268892 | 0,015452638 |
| ENSG00000261266 | CTD-2196E14.5 | 0,77  | 0,001272431 | 0,015486028 |
| ENSG00000001461 | NIPAL3        | 0,38  | 0,001273508 | 0,015489424 |
| ENSG00000136352 | NKX2-1        | 0,88  | 0,001274916 | 0,015496855 |
| ENSG00000197822 | OCLN          | -0,65 | 0,001290289 | 0,015673906 |
| ENSG00000165124 | SVEP1         | -1,16 | 0,001303545 | 0,015815735 |
| ENSG00000171282 | RP11-1055B8.7 | 0,44  | 0,001303593 | 0,015815735 |
| ENSG00000173110 | HSPA6         | -1,15 | 0,001306323 | 0,015838958 |
| ENSG00000152137 | HSPB8         | -1,19 | 0,001310798 | 0,015854724 |
| ENSG00000152465 | NMT2          | -0,66 | 0,001311704 | 0,015854724 |
| ENSG00000166987 | MBD6          | 0,42  | 0,001311214 | 0,015854724 |
| ENSG00000172732 | MUS81         | -0,49 | 0,001309338 | 0,015854724 |
| ENSG00000186919 | ZACN          | -1,15 | 0,001311039 | 0,015854724 |
| ENSG00000105825 | TFPI2         | -0,91 | 0,00131411  | 0,01587392  |
| ENSG00000159873 | CCDC117       | 0,36  | 0,001315064 | 0,015875575 |
| ENSG00000106333 | PCOLCE        | 0,67  | 0,001325748 | 0,015985724 |
| ENSG00000183853 | KIRREL        | -0,95 | 0,001326657 | 0,015985724 |
| ENSG00000223496 | EXOSC6        | -0,50 | 0,001325853 | 0,015985724 |
| ENSG00000135686 | KLHL36        | 0,36  | 0,001329977 | 0,016015797 |
| ENSG00000073067 | CYP2W1        | 1,18  | 0,001337362 | 0,016094751 |
| ENSG00000145555 | MYO10         | -0,46 | 0,001360893 | 0,016367796 |
| ENSG00000164465 | DCBLD1        | -0,85 | 0,001362311 | 0,016374712 |
| ENSG00000109062 | SLC9A3R1      | 0,42  | 0,001363259 | 0,016375964 |
| ENSG00000124333 | VAMP7         | -0,42 | 0,001367835 | 0,016401052 |
| ENSG00000183963 | SMTN          | -0,77 | 0,001366427 | 0,016401052 |
| ENSG00000254093 | PINX1         | -0,69 | 0,00136788  | 0,016401052 |
| ENSG00000176014 | TUBB6         | -0,68 | 0,001369994 | 0,016416262 |
| ENSG00000242086 | LINC00969     | 0,67  | 0,00137485  | 0,016464297 |
| ENSG00000137700 | SLC37A4       | 0,43  | 0,001377616 | 0,016487256 |
| ENSG00000136205 | TNS3          | 0,39  | 0,001384314 | 0,01655721  |
| ENSG00000234667 | ACTBP13       | -1,17 | 0,001385421 | 0,016560256 |

|                 |               |       |             |             |
|-----------------|---------------|-------|-------------|-------------|
| ENSG00000181392 | SYNE4         | 0,46  | 0,001393805 | 0,016650225 |
| ENSG00000230633 | RP11-37E23.5  | 1,20  | 0,001396506 | 0,016672233 |
| ENSG00000171617 | ENC1          | -0,83 | 0,001400563 | 0,016710402 |
| ENSG00000120784 | ZFP30         | 0,45  | 0,001403567 | 0,016735969 |
| ENSG00000125814 | NAPB          | 0,44  | 0,00140669  | 0,016762915 |
| ENSG00000165188 | RNF183        | 0,83  | 0,001409378 | 0,016784646 |
| ENSG00000121898 | CPXM2         | 1,16  | 0,001417959 | 0,016876497 |
| ENSG00000116871 | MAP7D1        | -0,55 | 0,001423775 | 0,016935331 |
| ENSG00000108984 | MAP2K6        | 1,01  | 0,0014352   | 0,017060788 |
| ENSG00000246922 | UBAP1L        | 0,69  | 0,00143754  | 0,017078149 |
| ENSG00000072210 | ALDH3A2       | 0,64  | 0,001438639 | 0,01708076  |
| ENSG00000010818 | HIVEP2        | -0,46 | 0,001439716 | 0,017083105 |
| ENSG00000229677 | RP11-383F6.1  | 1,20  | 0,001441929 | 0,017098919 |
| ENSG00000177932 | ZNF354C       | 0,48  | 0,001442926 | 0,017100306 |
| ENSG00000155189 | AGPAT5        | -0,58 | 0,001445877 | 0,017124828 |
| ENSG00000183010 | PYCR1         | -0,75 | 0,001449211 | 0,017153849 |
| ENSG00000158286 | RNF207        | 0,49  | 0,001461614 | 0,017290127 |
| ENSG00000138363 | ATIC          | -0,53 | 0,001465154 | 0,017321456 |
| ENSG00000110104 | CCDC86        | -0,49 | 0,001475865 | 0,017437469 |
| ENSG00000235554 | AC005822.1    | 0,41  | 0,001497673 | 0,017684381 |
| ENSG00000181104 | F2R           | -0,83 | 0,001500469 | 0,017706622 |
| ENSG00000136603 | SKIL          | -0,78 | 0,001505591 | 0,017756285 |
| ENSG00000163739 | CXCL1         | -1,03 | 0,001510261 | 0,017800555 |
| ENSG00000042445 | RETSAT        | -0,34 | 0,001519849 | 0,017902702 |
| ENSG00000175066 | GK5           | 0,49  | 0,001526992 | 0,017955182 |
| ENSG00000198901 | PRC1          | 0,68  | 0,001527078 | 0,017955182 |
| ENSG00000224259 | LINC01133     | -0,60 | 0,001527016 | 0,017955182 |
| ENSG00000125977 | EIF2S2        | -0,38 | 0,0015384   | 0,01807736  |
| ENSG00000233705 | SLC26A4-AS1   | -1,16 | 0,001539789 | 0,018082741 |
| ENSG00000047936 | ROS1          | -1,14 | 0,001543812 | 0,018119034 |
| ENSG00000119523 | ALG2          | -0,35 | 0,001550321 | 0,018184441 |
| ENSG00000164176 | EDIL3         | 0,71  | 0,001559173 | 0,018277229 |
| ENSG00000128039 | SRD5A3        | -0,55 | 0,001562343 | 0,01829231  |
| ENSG00000261521 | RP11-408H20.1 | -1,13 | 0,001562312 | 0,01829231  |
| ENSG00000196967 | ZNF585A       | 0,69  | 0,001570614 | 0,018378071 |
| ENSG00000170379 | FAM115C       | 1,07  | 0,001573098 | 0,01839606  |
| ENSG00000120063 | GNA13         | -0,51 | 0,001574072 | 0,018396379 |
| ENSG00000006327 | TNFRSF12A     | -0,91 | 0,001577399 | 0,01841949  |
| ENSG00000187984 | ANKRD19P      | -1,04 | 0,001577946 | 0,01841949  |
| ENSG00000071246 | VASH1         | 0,87  | 0,001584495 | 0,018484819 |
| ENSG00000125910 | S1PR4         | 0,93  | 0,001589109 | 0,018516414 |
| ENSG00000180672 | AC007362.1    | 0,63  | 0,001588392 | 0,018516414 |
| ENSG00000137672 | TRPC6         | 1,13  | 0,001597187 | 0,018588228 |
| ENSG00000273247 | RP11-83A24.2  | 0,59  | 0,001596283 | 0,018588228 |

|                 |               |       |             |             |
|-----------------|---------------|-------|-------------|-------------|
| ENSG00000118263 | KLF7          | -0,77 | 0,001609703 | 0,018722675 |
| ENSG00000130821 | SLC6A8        | 0,57  | 0,001611225 | 0,018729161 |
| ENSG00000183742 | MACC1         | -0,61 | 0,001612293 | 0,018730366 |
| ENSG00000197483 | ZNF628        | -0,48 | 0,001616285 | 0,018765519 |
| ENSG00000168394 | TAP1          | -0,63 | 0,001620232 | 0,018800107 |
| ENSG00000131323 | TRAF3         | -0,45 | 0,00162915  | 0,018892309 |
| ENSG00000174469 | CNTNAP2       | -1,06 | 0,001632443 | 0,018919196 |
| ENSG00000101608 | MYL12A        | -0,48 | 0,001636513 | 0,018955057 |
| ENSG00000183778 | B3GALT5       | 0,81  | 0,001638292 | 0,018964353 |
| ENSG00000117407 | ARTN          | 0,59  | 0,00163994  | 0,018972127 |
| ENSG00000248175 | CTC-428G20.3  | 0,52  | 0,001648038 | 0,019054461 |
| ENSG00000073605 | GSDMB         | 0,55  | 0,001652372 | 0,019075937 |
| ENSG00000133138 | TBC1D8B       | 0,42  | 0,001652324 | 0,019075937 |
| ENSG00000140332 | TLE3          | 0,42  | 0,001652842 | 0,019075937 |
| ENSG00000115604 | IL18R1        | -0,67 | 0,001654642 | 0,019085367 |
| ENSG00000178381 | ZFAND2A       | -0,79 | 0,001656525 | 0,019095751 |
| ENSG00000095203 | EPB41L4B      | -0,47 | 0,001660554 | 0,019102282 |
| ENSG00000110011 | DNAJC4        | 0,48  | 0,001659956 | 0,019102282 |
| ENSG00000123485 | HJURP         | 0,94  | 0,001658084 | 0,019102282 |
| ENSG00000164284 | GRPEL2        | -0,57 | 0,001661025 | 0,019102282 |
| ENSG00000116039 | ATP6V1B1      | 1,19  | 0,001665882 | 0,019144802 |
| ENSG00000143632 | ACTA1         | -1,19 | 0,001666694 | 0,019144802 |
| ENSG00000172575 | RASGRP1       | -1,15 | 0,00166792  | 0,019147564 |
| ENSG00000251381 | LINC00958     | -0,90 | 0,001670584 | 0,019166815 |
| ENSG00000087263 | OGFOD1        | -0,39 | 0,001672882 | 0,01918185  |
| ENSG00000170027 | YWHAG         | -0,44 | 0,001677763 | 0,019226466 |
| ENSG00000052749 | RRP12         | -0,47 | 0,001678887 | 0,019228008 |
| ENSG00000115271 | GCA           | 0,50  | 0,001690078 | 0,019324315 |
| ENSG00000143382 | ADAMTSL4      | 1,07  | 0,001690458 | 0,019324315 |
| ENSG00000150938 | CRIM1         | -0,56 | 0,001688594 | 0,019324315 |
| ENSG00000213694 | S1PR3         | -1,18 | 0,00169227  | 0,019324315 |
| ENSG00000239593 | RP11-477J21.6 | -1,19 | 0,001691546 | 0,019324315 |
| ENSG00000165802 | NSMF          | -0,38 | 0,001697428 | 0,019371817 |
| ENSG00000008441 | NFIX          | 0,46  | 0,00170699  | 0,019457046 |
| ENSG00000088808 | PPP1R13B      | 0,47  | 0,001707901 | 0,019457046 |
| ENSG00000115484 | CCT4          | -0,33 | 0,001706588 | 0,019457046 |
| ENSG00000249158 | PCDHA11       | -1,18 | 0,001719031 | 0,019572372 |
| ENSG00000196159 | FAT4          | -0,79 | 0,001726626 | 0,019647329 |
| ENSG00000114529 | C3orf52       | -0,79 | 0,001729971 | 0,019673857 |
| ENSG00000215912 | TTC34         | -0,79 | 0,001732391 | 0,019689853 |
| ENSG00000198466 | ZNF587        | 0,34  | 0,001739489 | 0,019758965 |
| ENSG00000158792 | SPATA2L       | -0,53 | 0,001746153 | 0,019823075 |
| ENSG00000070371 | CLTCL1        | -0,46 | 0,001751988 | 0,019854497 |
| ENSG00000157873 | TNFRSF14      | 0,48  | 0,001750938 | 0,019854497 |

|                 |               |       |             |             |
|-----------------|---------------|-------|-------------|-------------|
| ENSG00000254815 | RP11-496I9.1  | 0,82  | 0,001751274 | 0,019854497 |
| ENSG00000154080 | CHST9         | 0,80  | 0,001762274 | 0,019959421 |
| ENSG00000173992 | CCS           | 0,50  | 0,001773139 | 0,020070772 |
| ENSG00000142552 | RCN3          | 0,92  | 0,001774218 | 0,020071293 |
| ENSG00000121073 | SLC35B1       | -0,39 | 0,001781439 | 0,020141255 |
| ENSG00000137171 | KLC4          | 0,40  | 0,001784668 | 0,020166027 |
| ENSG00000030066 | NUP160        | -0,31 | 0,001787645 | 0,020176184 |
| ENSG00000179981 | TSHZ1         | 0,56  | 0,001786805 | 0,020176184 |
| ENSG00000122678 | POLM          | 0,60  | 0,001790619 | 0,020198019 |
| ENSG00000261372 | RP11-529H20.6 | 1,00  | 0,001794221 | 0,020226902 |
| ENSG00000162231 | NXF1          | 0,40  | 0,001796153 | 0,020236937 |
| ENSG00000264098 | CTD-2350C19.1 | 0,95  | 0,001804642 | 0,020320797 |
| ENSG00000152127 | MGAT5         | -0,40 | 0,001807494 | 0,020329432 |
| ENSG00000162572 | SCNN1D        | 0,57  | 0,001807503 | 0,020329432 |
| ENSG00000165650 | PDZD8         | -0,51 | 0,001814326 | 0,020394363 |
| ENSG00000146830 | GIGYF1        | 0,40  | 0,001819526 | 0,020440986 |
| ENSG00000139865 | TTC6          | 0,45  | 0,001828945 | 0,020534931 |
| ENSG00000140464 | PML           | -0,47 | 0,001831328 | 0,020549804 |
| ENSG00000130307 | USHBP1        | 1,17  | 0,001833456 | 0,020561812 |
| ENSG00000105514 | RAB3D         | 0,75  | 0,001836472 | 0,020571872 |
| ENSG00000158125 | XDH           | -1,00 | 0,001835754 | 0,020571872 |
| ENSG00000115459 | ELMOD3        | 0,43  | 0,001842599 | 0,020628608 |
| ENSG00000101445 | PPP1R16B      | 0,68  | 0,001845957 | 0,020654304 |
| ENSG00000106261 | ZKSCAN1       | 0,39  | 0,001848123 | 0,020666636 |
| ENSG00000005469 | CROT          | 0,58  | 0,001860232 | 0,020778119 |
| ENSG00000148484 | RSU1          | -0,50 | 0,001859964 | 0,020778119 |
| ENSG00000154589 | LY96          | -1,16 | 0,001870412 | 0,020879818 |
| ENSG00000227558 | PGM5P2        | -1,18 | 0,001873035 | 0,020897093 |
| ENSG00000148798 | INA           | -1,09 | 0,001889643 | 0,021058192 |
| ENSG00000205336 | GPR56         | -0,63 | 0,001889489 | 0,021058192 |
| ENSG00000163703 | CRELD1        | 0,41  | 0,001893327 | 0,021087152 |
| ENSG00000108947 | EFNB3         | 0,71  | 0,001897558 | 0,021122163 |
| ENSG00000049249 | TNFRSF9       | -1,17 | 0,00191485  | 0,021302435 |
| ENSG00000082781 | ITGB5         | -0,57 | 0,001939191 | 0,021560879 |
| ENSG00000153714 | LURAP1L       | -0,50 | 0,001950828 | 0,021677847 |
| ENSG00000130779 | CLIP1         | -0,35 | 0,001952651 | 0,021685698 |
| ENSG00000160111 | CPAMD8        | 0,79  | 0,001959425 | 0,021748499 |
| ENSG00000125430 | HS3ST3B1      | 0,87  | 0,00196607  | 0,021809796 |
| ENSG00000137876 | RSL24D1       | -0,42 | 0,001969586 | 0,021836323 |
| ENSG00000166736 | HTR3A         | -1,14 | 0,001983759 | 0,02198091  |
| ENSG00000163141 | BNIPL         | 0,87  | 0,001995521 | 0,022098632 |
| ENSG00000117519 | CNN3          | 0,33  | 0,002000321 | 0,022139163 |
| ENSG00000127993 | RBM48         | 0,47  | 0,00200155  | 0,02214015  |
| ENSG00000073331 | ALPK1         | 0,45  | 0,002005405 | 0,022170174 |



|                 |               |       |             |             |
|-----------------|---------------|-------|-------------|-------------|
| ENSG00000095303 | PTGS1         | 1,11  | 0,002008555 | 0,022179748 |
| ENSG00000129757 | CDKN1C        | -0,64 | 0,002008483 | 0,022179748 |
| ENSG00000115325 | DOK1          | 0,67  | 0,002010448 | 0,022188031 |
| ENSG00000196440 | ARMCX4        | 0,58  | 0,002017742 | 0,022255891 |
| ENSG00000105497 | ZNF175        | 0,49  | 0,002020352 | 0,022266329 |
| ENSG00000166257 | SCN3B         | -1,16 | 0,002020981 | 0,022266329 |
| ENSG00000114999 | TTL           | -0,53 | 0,00202586  | 0,022303794 |
| ENSG00000171914 | TLN2          | -1,03 | 0,002026678 | 0,022303794 |
| ENSG00000234465 | PINLYP        | 0,90  | 0,002029535 | 0,022322587 |
| ENSG00000110911 | SLC11A2       | -0,42 | 0,002031867 | 0,022335593 |
| ENSG00000142541 | RPL13A        | 0,50  | 0,002035326 | 0,022349292 |
| ENSG00000197102 | DYNC1H1       | -0,31 | 0,002035415 | 0,022349292 |
| ENSG00000255142 | AP006621.6    | 1,09  | 0,002039156 | 0,022377719 |
| ENSG00000134058 | CDK7          | -0,40 | 0,002049824 | 0,022482091 |
| ENSG00000172667 | ZMAT3         | -0,43 | 0,002053176 | 0,022506151 |
| ENSG00000154370 | TRIM11        | 0,38  | 0,002062813 | 0,022599027 |
| ENSG00000084636 | COL16A1       | -1,06 | 0,002064201 | 0,022601493 |
| ENSG00000156273 | BACH1         | -0,52 | 0,002067354 | 0,022602044 |
| ENSG00000157483 | MYO1E         | -0,53 | 0,002067743 | 0,022602044 |
| ENSG00000166997 | CNPY4         | 0,50  | 0,002065536 | 0,022602044 |
| ENSG00000124193 | SRSF6         | 0,36  | 0,002069649 | 0,022610156 |
| ENSG00000143549 | TPM3          | -0,36 | 0,00207188  | 0,022621809 |
| ENSG00000047346 | FAM214A       | 0,41  | 0,002078688 | 0,022674465 |
| ENSG00000267940 | RP11-290F24.6 | 1,02  | 0,002079037 | 0,022674465 |
| ENSG00000173705 | SUSD5         | -0,95 | 0,002082769 | 0,022702411 |
| ENSG00000163864 | NMNAT3        | 0,55  | 0,002098387 | 0,022859823 |
| ENSG00000161905 | ALOX15        | 0,91  | 0,002112633 | 0,023002119 |
| ENSG00000173545 | ZNF622        | -0,46 | 0,002115685 | 0,023022449 |
| ENSG00000100302 | RASD2         | -1,16 | 0,002118778 | 0,023043197 |
| ENSG00000103319 | EEF2K         | 0,37  | 0,002128285 | 0,023133641 |
| ENSG00000132801 | ZSWIM3        | 0,59  | 0,00213234  | 0,023151798 |
| ENSG00000169057 | MECP2         | 0,31  | 0,002131195 | 0,023151798 |
| ENSG00000109079 | TNFAIP1       | -0,50 | 0,002144682 | 0,023233879 |
| ENSG00000129197 | RPAIN         | 0,45  | 0,002141227 | 0,023233879 |
| ENSG00000145675 | PIK3R1        | 0,64  | 0,002144684 | 0,023233879 |
| ENSG00000169710 | FASN          | -0,53 | 0,002144087 | 0,023233879 |
| ENSG00000187626 | ZKSCAN4       | 0,71  | 0,002149197 | 0,023269785 |
| ENSG00000130770 | ATPIF1        | 0,54  | 0,00215756  | 0,02334732  |
| ENSG00000168827 | GFM1          | -0,42 | 0,002159477 | 0,023355054 |
| ENSG00000210117 | MT-TW         | -1,15 | 0,002162296 | 0,023372527 |
| ENSG00000084073 | ZMPSTE24      | -0,37 | 0,002167054 | 0,023410933 |
| ENSG00000102886 | GDPD3         | 0,78  | 0,00217185  | 0,023449705 |
| ENSG00000064218 | DMRT3         | 1,04  | 0,002177468 | 0,023484258 |
| ENSG00000184371 | CSF1          | -0,70 | 0,002176384 | 0,023484258 |

|                 |               |       |             |             |
|-----------------|---------------|-------|-------------|-------------|
| ENSG00000168397 | ATG4B         | 0,37  | 0,002179674 | 0,023494996 |
| ENSG00000186832 | KRT16         | -1,07 | 0,002181578 | 0,023502478 |
| ENSG00000089692 | LAG3          | 1,11  | 0,002189666 | 0,023576542 |
| ENSG00000126247 | CAPNS1        | 0,41  | 0,002192056 | 0,023589196 |
| ENSG00000105246 | EBI3          | -1,16 | 0,002195131 | 0,023609209 |
| ENSG00000245694 | CRNDE         | 0,54  | 0,002197711 | 0,023623871 |
| ENSG00000139304 | PTPRQ         | 0,88  | 0,002199824 | 0,023633512 |
| ENSG00000128298 | BAIAP2L2      | 1,12  | 0,002210145 | 0,023696274 |
| ENSG00000167460 | TPM4          | -0,63 | 0,002210546 | 0,023696274 |
| ENSG00000184445 | KNTC1         | 0,54  | 0,002209316 | 0,023696274 |
| ENSG00000256223 | ZNF10         | 0,54  | 0,002207909 | 0,023696274 |
| ENSG00000152049 | KCNE4         | 0,79  | 0,002214614 | 0,02372679  |
| ENSG00000132837 | DMGDH         | -0,75 | 0,002236417 | 0,023947165 |
| ENSG00000266911 | RP1-161P9.5   | 1,15  | 0,00224224  | 0,023996292 |
| ENSG00000109193 | SULT1E1       | 0,77  | 0,002252756 | 0,024082713 |
| ENSG00000135763 | URB2          | -0,43 | 0,002252795 | 0,024082713 |
| ENSG00000070423 | RNF126        | -0,39 | 0,002255959 | 0,02410327  |
| ENSG00000149260 | CAPN5         | 0,59  | 0,002262987 | 0,024165069 |
| ENSG00000144119 | C1QL2         | -1,15 | 0,002267699 | 0,024202075 |
| ENSG00000147408 | CSGALNACT1    | -0,90 | 0,002272601 | 0,02424108  |
| ENSG00000171124 | FUT3          | 0,37  | 0,002275898 | 0,024262917 |
| ENSG00000102554 | KLF5          | 0,57  | 0,002285558 | 0,024352543 |
| ENSG00000197991 | PCDH20        | 0,86  | 0,002286902 | 0,024353502 |
| ENSG00000137872 | SEMA6D        | 1,00  | 0,002290225 | 0,024375523 |
| ENSG00000131504 | DIAPH1        | -0,33 | 0,002298092 | 0,024445857 |
| ENSG00000092421 | SEMA6A        | 0,85  | 0,002304352 | 0,024499032 |
| ENSG00000113971 | NPHP3         | 0,46  | 0,002307028 | 0,024503401 |
| ENSG00000140379 | BCL2A1        | -1,12 | 0,002307286 | 0,024503401 |
| ENSG00000196917 | HCAR1         | 0,79  | 0,002314008 | 0,024547948 |
| ENSG00000261786 | RP4-555D20.2  | 0,85  | 0,002313277 | 0,024547948 |
| ENSG00000155324 | GRAMD3        | -0,49 | 0,002324182 | 0,02464242  |
| ENSG00000197261 | C6orf141      | -0,79 | 0,002338785 | 0,024783724 |
| ENSG00000251076 | RP11-526F3.1  | 1,07  | 0,002345685 | 0,024843284 |
| ENSG00000239857 | GET4          | 0,57  | 0,002348392 | 0,024844857 |
| ENSG00000270441 | RP11-694I15.7 | 1,12  | 0,002347716 | 0,024844857 |
| ENSG00000103227 | LMF1          | 0,47  | 0,00235501  | 0,024901315 |
| ENSG00000141076 | CIRH1A        | -0,41 | 0,002359398 | 0,024934141 |
| ENSG00000117877 | CD3EAP        | -0,69 | 0,002362146 | 0,024949609 |
| ENSG00000137814 | HAUS2         | -0,47 | 0,002371207 | 0,025031696 |
| ENSG00000124102 | PI3           | -1,12 | 0,002390248 | 0,025205304 |
| ENSG00000158411 | MITD1         | 0,48  | 0,002389585 | 0,025205304 |
| ENSG00000142002 | DPP9          | -0,37 | 0,002397105 | 0,0252639   |
| ENSG00000142408 | CACNG8        | 1,15  | 0,002435523 | 0,025654876 |
| ENSG00000160233 | LRRC3         | -1,10 | 0,002449858 | 0,025778464 |

|                 |               |       |             |             |
|-----------------|---------------|-------|-------------|-------------|
| ENSG00000181852 | RNF41         | -0,47 | 0,00244991  | 0,025778464 |
| ENSG00000214922 | HLA-F-AS1     | 1,05  | 0,002472484 | 0,026001908 |
| ENSG00000079691 | LRRCL16A      | 0,56  | 0,002484275 | 0,026097651 |
| ENSG00000116183 | PAPPA2        | -1,12 | 0,00248395  | 0,026097651 |
| ENSG00000250571 | GLI4          | 0,53  | 0,002500531 | 0,026254226 |
| ENSG00000170153 | RNF150        | 1,01  | 0,0025057   | 0,026294287 |
| ENSG00000121454 | LHX4          | -1,09 | 0,002507736 | 0,026301438 |
| ENSG00000161958 | FGF11         | 0,77  | 0,002509754 | 0,026308397 |
| ENSG00000253676 | TAGLN2P1      | -0,66 | 0,00251374  | 0,026335964 |
| ENSG00000113368 | LMNB1         | 0,56  | 0,002524022 | 0,026429431 |
| ENSG00000232324 | AC008440.10   | -1,14 | 0,002529774 | 0,026475396 |
| ENSG00000073150 | PANX2         | -0,83 | 0,002534181 | 0,026494729 |
| ENSG00000225531 | RP11-196I18.3 | 0,68  | 0,00253435  | 0,026494729 |
| ENSG00000172037 | LAMB2         | 0,45  | 0,002557142 | 0,026718622 |
| ENSG00000109171 | SLAIN2        | -0,48 | 0,002567538 | 0,026784028 |
| ENSG00000155621 | C9orf85       | 0,52  | 0,002566478 | 0,026784028 |
| ENSG00000166816 | LDHD          | 0,78  | 0,002566002 | 0,026784028 |
| ENSG00000163463 | KRTCAP2       | 0,56  | 0,002586889 | 0,026971407 |
| ENSG00000067221 | STOML1        | -0,58 | 0,002591462 | 0,027004587 |
| ENSG00000213846 | AC098614.2    | -0,68 | 0,002603077 | 0,027111081 |
| ENSG00000165125 | TRPV6         | -1,00 | 0,002610045 | 0,027169087 |
| ENSG00000161647 | MPP3          | -0,76 | 0,002620978 | 0,027268275 |
| ENSG00000260912 | RP11-363E7.4  | -0,60 | 0,002624036 | 0,027285482 |
| ENSG00000272906 | RP11-533E19.7 | 0,89  | 0,002631297 | 0,027346346 |
| ENSG00000238260 | RP11-46F15.2  | 1,05  | 0,002635754 | 0,02737801  |
| ENSG00000174109 | C16orf91      | -0,56 | 0,002637767 | 0,027384278 |
| ENSG00000163817 | SLC6A20       | -0,93 | 0,002640476 | 0,027397755 |
| ENSG00000119431 | HDHD3         | 0,42  | 0,002672442 | 0,027714631 |
| ENSG00000115221 | ITGB6         | -0,90 | 0,002677965 | 0,02775709  |
| ENSG00000217801 | RP11-465B22.3 | -1,04 | 0,00269326  | 0,027900739 |
| ENSG00000173933 | RBM4          | 0,57  | 0,002696712 | 0,027921607 |
| ENSG00000164808 | SPIDR         | 0,44  | 0,002700055 | 0,027941326 |
| ENSG00000207730 | MIR200B       | 0,93  | 0,002701523 | 0,027941627 |
| ENSG00000235954 | TTC28-AS1     | 0,53  | 0,002708305 | 0,027996871 |
| ENSG00000176472 | ZNF575        | 0,96  | 0,002723486 | 0,028123862 |
| ENSG00000211459 | MT-RNR1       | -0,59 | 0,002722769 | 0,028123862 |
| ENSG00000139725 | RHOF          | -0,82 | 0,002734465 | 0,028216937 |
| ENSG00000160207 | HSF2BP        | -0,88 | 0,002735404 | 0,028216937 |
| ENSG00000101198 | NKAIN4        | -1,05 | 0,002738068 | 0,028229426 |
| ENSG00000114126 | TFDP2         | 0,36  | 0,002753767 | 0,028368386 |
| ENSG00000124942 | AHNAK         | 0,38  | 0,002754467 | 0,028368386 |
| ENSG00000249661 | TNRC18P1      | -1,13 | 0,002767679 | 0,028489349 |
| ENSG00000163811 | WDR43         | -0,38 | 0,002775826 | 0,028558072 |
| ENSG00000143324 | XPR1          | -0,40 | 0,002787534 | 0,028663351 |

|                 |              |       |             |             |
|-----------------|--------------|-------|-------------|-------------|
| ENSG00000177732 | SOX12        | 0,54  | 0,002791517 | 0,028689113 |
| ENSG00000237037 | NDUFA6-AS1   | 0,79  | 0,002799897 | 0,028760019 |
| ENSG00000100813 | ACIN1        | 0,35  | 0,002812586 | 0,02886181  |
| ENSG00000137563 | GGH          | 0,59  | 0,002812778 | 0,02886181  |
| ENSG00000179104 | TMTC2        | 0,38  | 0,002816907 | 0,028888914 |
| ENSG00000198150 | AC135178.1   | 0,69  | 0,002834933 | 0,029058434 |
| ENSG00000137509 | PRCP         | 0,43  | 0,002840572 | 0,029100881 |
| ENSG00000021645 | NRXN3        | 0,60  | 0,002850486 | 0,029156313 |
| ENSG00000129055 | ANAPC13      | -0,33 | 0,00284919  | 0,029156313 |
| ENSG00000171867 | PRNP         | -0,62 | 0,002849902 | 0,029156313 |
| ENSG00000137070 | IL11RA       | 0,80  | 0,002858297 | 0,029220826 |
| ENSG00000170681 | MURC         | -1,00 | 0,002866746 | 0,029291785 |
| ENSG00000079215 | SLC1A3       | 0,82  | 0,002877512 | 0,029386331 |
| ENSG00000129219 | PLD2         | 0,38  | 0,002879098 | 0,029387069 |
| ENSG00000082641 | NFE2L1       | -0,39 | 0,002884994 | 0,029431788 |
| ENSG00000080845 | DLGAP4       | -0,39 | 0,002886783 | 0,029434584 |
| ENSG00000121644 | DESI2        | -0,33 | 0,002890442 | 0,029456427 |
| ENSG00000070526 | ST6GALNAC1   | 0,42  | 0,002900928 | 0,029547786 |
| ENSG00000186715 | MST1L        | 0,92  | 0,002912617 | 0,0296513   |
| ENSG00000129473 | BCL2L2       | 0,36  | 0,002917206 | 0,029682452 |
| ENSG00000136108 | CKAP2        | 0,54  | 0,002921793 | 0,029708755 |
| ENSG00000136872 | ALDOB        | -1,11 | 0,00292285  | 0,029708755 |
| ENSG00000121797 | CCRL2        | -1,10 | 0,00292675  | 0,02973284  |
| ENSG00000067992 | PDK3         | 0,57  | 0,002931123 | 0,029761699 |
| ENSG00000060140 | STYK1        | 0,64  | 0,002937376 | 0,02980563  |
| ENSG00000188279 | FAM25C       | -0,90 | 0,002938518 | 0,02980563  |
| ENSG00000248863 | RP11-83A24.1 | 0,95  | 0,002951068 | 0,029917298 |
| ENSG00000262001 | DLGAP1-AS2   | -0,72 | 0,002954427 | 0,029935728 |
| ENSG00000226738 | CTA-384D8.31 | -1,12 | 0,002957138 | 0,029947579 |
| ENSG00000038274 | MAT2B        | 0,33  | 0,002965181 | 0,029979445 |
| ENSG00000074657 | ZNF532       | -0,52 | 0,002966459 | 0,029979445 |
| ENSG00000147676 | MAL2         | -0,32 | 0,002963629 | 0,029979445 |
| ENSG00000159069 | FBXW5        | -0,36 | 0,002966447 | 0,029979445 |
| ENSG00000139266 | MARCH9       | 0,41  | 0,00296826  | 0,029982047 |
| ENSG00000204228 | HSD17B8      | 0,74  | 0,002982828 | 0,030113541 |
| ENSG00000141522 | ARHGDI1A     | -0,41 | 0,002985368 | 0,03012146  |
| ENSG00000160813 | PPP1R35      | 0,51  | 0,002986714 | 0,03012146  |
| ENSG00000110811 | LEPREL2      | 0,68  | 0,002997507 | 0,03021456  |
| ENSG00000246695 | RASSF8-AS1   | 0,61  | 0,002999056 | 0,03021456  |
| ENSG00000077454 | LRCH4        | 0,38  | 0,003004452 | 0,030253227 |
| ENSG00000079482 | OPHN1        | 0,47  | 0,003018953 | 0,03038349  |
| ENSG00000160932 | LY6E         | 0,48  | 0,003021536 | 0,030383667 |
| ENSG00000268605 | CTB-50E14.4  | 1,12  | 0,003022099 | 0,030383667 |
| ENSG00000085276 | MECOM        | 0,32  | 0,003025405 | 0,030387609 |

|                 |               |       |             |             |
|-----------------|---------------|-------|-------------|-------------|
| ENSG00000125726 | CD70          | -1,10 | 0,003030313 | 0,030387609 |
| ENSG00000135842 | FAM129A       | -0,60 | 0,003028168 | 0,030387609 |
| ENSG00000174951 | FUT1          | -0,56 | 0,003028864 | 0,030387609 |
| ENSG00000204544 | MUC21         | -1,09 | 0,003029755 | 0,030387609 |
| ENSG00000205765 | C5orf51       | -0,37 | 0,003034252 | 0,030411412 |
| ENSG00000118515 | SGK1          | -0,62 | 0,003041984 | 0,030473185 |
| ENSG00000230457 | PA2G4P4       | -0,43 | 0,00304996  | 0,030537333 |
| ENSG00000112658 | SRF           | -0,45 | 0,003075695 | 0,030779132 |
| ENSG00000162409 | PRKAA2        | 0,49  | 0,003080277 | 0,030809112 |
| ENSG00000130956 | HABP4         | -0,51 | 0,003083736 | 0,030827836 |
| ENSG00000273373 | RP5-1074L1.4  | 0,81  | 0,003086964 | 0,030844235 |
| ENSG00000145864 | GABRB2        | 1,12  | 0,003095059 | 0,030909212 |
| ENSG00000261094 | RP11-355O1.11 | 0,76  | 0,0030998   | 0,030940658 |
| ENSG00000184979 | USP18         | -0,58 | 0,003107721 | 0,031003783 |
| ENSG00000115129 | TP53I3        | 0,50  | 0,003119677 | 0,031107085 |
| ENSG00000065427 | KARS          | -0,36 | 0,003128408 | 0,031139092 |
| ENSG00000132535 | DLG4          | 0,63  | 0,003127652 | 0,031139092 |
| ENSG00000188641 | DPYD          | 0,53  | 0,003127966 | 0,031139092 |
| ENSG00000201684 | RN7SKP239     | 0,93  | 0,003129299 | 0,031139092 |
| ENSG00000090975 | PITPNM2       | -0,73 | 0,003137335 | 0,031203065 |
| ENSG00000116273 | PHF13         | 0,42  | 0,003145955 | 0,031256797 |
| ENSG00000176697 | BDNF          | -1,11 | 0,003145366 | 0,031256797 |
| ENSG00000143387 | CTSK          | 0,71  | 0,003147766 | 0,031258796 |
| ENSG00000033050 | ABCF2         | -0,34 | 0,003152469 | 0,031289507 |
| ENSG00000263002 | ZNF234        | 0,55  | 0,003154783 | 0,031296475 |
| ENSG00000204257 | HLA-DMA       | -0,59 | 0,003156467 | 0,031297204 |
| ENSG00000107262 | BAG1          | 0,47  | 0,003164431 | 0,031352311 |
| ENSG00000224152 | AC009506.1    | 0,60  | 0,003165253 | 0,031352311 |
| ENSG00000172379 | ARNT2         | -0,90 | 0,003172633 | 0,031402109 |
| ENSG00000181634 | TNFSF15       | -1,01 | 0,003173514 | 0,031402109 |
| ENSG00000167114 | SLC27A4       | -0,57 | 0,003187448 | 0,031523928 |
| ENSG00000003249 | DBNDD1        | -0,46 | 0,003207754 | 0,031708609 |
| ENSG00000132570 | PCBD2         | 0,45  | 0,003212897 | 0,031743291 |
| ENSG00000221978 | CCNL2         | 0,43  | 0,003237601 | 0,031971106 |
| ENSG00000184307 | ZDHHC23       | -0,45 | 0,003252437 | 0,032101285 |
| ENSG00000110429 | FBXO3         | 0,31  | 0,003257386 | 0,032133803 |
| ENSG00000067064 | IDI1          | -0,49 | 0,003259111 | 0,032134499 |
| ENSG00000124831 | LRRFIP1       | -0,36 | 0,003270173 | 0,032223216 |
| ENSG00000133731 | IMPA1         | 0,40  | 0,003271426 | 0,032223216 |
| ENSG00000022267 | FHL1          | -0,92 | 0,003277826 | 0,032269891 |
| ENSG00000100814 | CCNB1IP1      | -0,38 | 0,003285394 | 0,032328011 |
| ENSG00000142082 | SIRT3         | 0,36  | 0,003295383 | 0,032409888 |
| ENSG00000177465 | ACOT4         | -0,99 | 0,00329734  | 0,032412718 |
| ENSG00000177565 | TBL1XR1       | 0,37  | 0,00330599  | 0,03243585  |

|                 |              |       |             |             |
|-----------------|--------------|-------|-------------|-------------|
| ENSG00000214049 | UCA1         | -1,09 | 0,003304389 | 0,03243585  |
| ENSG00000257576 | RP11-153M3.1 | -0,50 | 0,003306373 | 0,03243585  |
| ENSG00000272030 | RP1-178F15.4 | 0,78  | 0,003303408 | 0,03243585  |
| ENSG00000138798 | EGF          | -0,82 | 0,003320553 | 0,032558516 |
| ENSG00000072201 | LNX1         | 0,65  | 0,003323944 | 0,032575323 |
| ENSG00000085871 | MGST2        | 0,43  | 0,003326632 | 0,032585222 |
| ENSG00000104413 | ESRP1        | -0,40 | 0,003329188 | 0,032593822 |
| ENSG00000113580 | NR3C1        | -0,35 | 0,003348307 | 0,032762544 |
| ENSG00000189377 | CXCL17       | 0,45  | 0,003349795 | 0,032762544 |
| ENSG00000118960 | HS1BP3       | -0,43 | 0,003373049 | 0,032973376 |
| ENSG00000124440 | HIF3A        | 1,10  | 0,003378679 | 0,0330118   |
| ENSG00000167880 | EVPL         | 0,35  | 0,003397046 | 0,033174569 |
| ENSG00000132661 | NXT1         | -0,52 | 0,003400719 | 0,03319375  |
| ENSG00000135480 | KRT7         | -0,77 | 0,003428082 | 0,033393712 |
| ENSG00000163207 | IVL          | -1,03 | 0,003424793 | 0,033393712 |
| ENSG00000166510 | CCDC68       | -0,80 | 0,003427303 | 0,033393712 |
| ENSG00000169432 | SCN9A        | -0,93 | 0,003425338 | 0,033393712 |
| ENSG00000267834 | RP11-167N5.5 | 1,09  | 0,003440693 | 0,033499764 |
| ENSG00000187479 | C11orf96     | -1,10 | 0,003468263 | 0,033751269 |
| ENSG00000041982 | TNC          | -0,78 | 0,003477126 | 0,033820583 |
| ENSG00000241829 | RPL21P54     | -1,10 | 0,003478868 | 0,033820587 |
| ENSG00000134757 | DSG3         | -0,96 | 0,00349193  | 0,033930592 |
| ENSG00000132589 | FLOT2        | 0,35  | 0,003494517 | 0,033938745 |
| ENSG00000180185 | FAHD1        | -0,39 | 0,003509868 | 0,034070806 |
| ENSG00000132793 | LPIN3        | 0,58  | 0,003526377 | 0,034213962 |
| ENSG00000142528 | ZNF473       | -0,51 | 0,003531607 | 0,03421995  |
| ENSG00000164823 | OSGIN2       | -0,46 | 0,003532122 | 0,03421995  |
| ENSG00000166166 | TRMT61A      | -0,35 | 0,00353228  | 0,03421995  |
| ENSG00000196154 | S100A4       | 0,89  | 0,003534297 | 0,034222426 |
| ENSG00000120875 | DUSP4        | -0,49 | 0,003541178 | 0,034254904 |
| ENSG00000121064 | SCPEP1       | 0,69  | 0,003540831 | 0,034254904 |
| ENSG00000134716 | CYP2J2       | 0,64  | 0,003544828 | 0,034273145 |
| ENSG00000148337 | CIZ1         | -0,30 | 0,003554376 | 0,034348362 |
| ENSG00000153914 | SREK1        | 0,36  | 0,00356521  | 0,034419708 |
| ENSG00000174748 | RPL15        | 0,37  | 0,003565303 | 0,034419708 |
| ENSG00000114030 | KPNA1        | -0,32 | 0,003571795 | 0,034449114 |
| ENSG00000120868 | APAF1        | 0,35  | 0,003571896 | 0,034449114 |
| ENSG00000213639 | PPP1CB       | -0,34 | 0,003575971 | 0,034471297 |
| ENSG00000149532 | CPSF7        | 0,27  | 0,003578977 | 0,034483161 |
| ENSG00000104825 | NFKBIB       | -0,44 | 0,003584032 | 0,034514743 |
| ENSG00000100307 | CBX7         | 0,47  | 0,003587431 | 0,034530359 |
| ENSG00000255274 | TMPRSS4-AS1  | -1,09 | 0,003589913 | 0,034537128 |
| ENSG00000165156 | ZHX1         | 0,33  | 0,003605095 | 0,034666027 |
| ENSG00000167034 | NKX3-1       | -0,68 | 0,003608421 | 0,034680839 |

|                 |               |       |             |             |
|-----------------|---------------|-------|-------------|-------------|
| ENSG00000172461 | FUT9          | 1,07  | 0,003611202 | 0,034690396 |
| ENSG00000198169 | ZNF251        | 0,45  | 0,003619874 | 0,034756519 |
| ENSG00000268995 | VN1R82P       | 0,70  | 0,003631108 | 0,034847157 |
| ENSG00000152492 | CCDC50        | -0,32 | 0,00363528  | 0,034869964 |
| ENSG00000184886 | PIGW          | -0,47 | 0,003637136 | 0,034870544 |
| ENSG00000198133 | TMEM229B      | 0,42  | 0,003642811 | 0,03490773  |
| ENSG00000101557 | USP14         | -0,32 | 0,003651158 | 0,034970456 |
| ENSG00000270607 | RP11-359E10.1 | -1,04 | 0,003653229 | 0,034973046 |
| ENSG00000135002 | RFK           | -0,53 | 0,003666945 | 0,035087061 |
| ENSG00000105220 | GPI           | 0,36  | 0,003679728 | 0,035192038 |
| ENSG00000184828 | ZBTB7C        | 0,58  | 0,003682057 | 0,035196982 |
| ENSG00000171490 | RSL1D1        | -0,37 | 0,00368855  | 0,035241709 |
| ENSG00000112029 | FBXO5         | 0,53  | 0,003693305 | 0,035269788 |
| ENSG00000124787 | RPP40         | -0,59 | 0,003706939 | 0,035382599 |
| ENSG00000163067 | ZNF2          | 0,62  | 0,003720161 | 0,035491361 |
| ENSG00000177105 | RHOG          | -0,48 | 0,00373721  | 0,035636512 |
| ENSG00000227671 | MIR3916       | 0,47  | 0,003743092 | 0,035675085 |
| ENSG00000133134 | BEX2          | -0,83 | 0,003757453 | 0,035794395 |
| ENSG00000262155 | RP11-266L9.5  | 1,06  | 0,003766045 | 0,035858657 |
| ENSG00000118762 | PKD2          | 0,40  | 0,003781927 | 0,035974612 |
| ENSG00000254951 | RP11-494M8.4  | -1,08 | 0,003780658 | 0,035974612 |
| ENSG00000104872 | PIH1D1        | 0,31  | 0,003795846 | 0,036089332 |
| ENSG00000131669 | NINJ1         | -0,56 | 0,003819608 | 0,036279734 |
| ENSG00000133773 | CCDC59        | -0,50 | 0,003818587 | 0,036279734 |
| ENSG00000118246 | FASTKD2       | -0,40 | 0,003826933 | 0,036315586 |
| ENSG00000204070 | SYS1          | -0,38 | 0,003827121 | 0,036315586 |
| ENSG00000145996 | CDKAL1        | -0,74 | 0,003829338 | 0,036318873 |
| ENSG00000179222 | MAGED1        | 0,36  | 0,003843425 | 0,036434695 |
| ENSG00000106460 | TMEM106B      | -0,47 | 0,00385572  | 0,03650132  |
| ENSG00000148488 | ST8SIA6       | 0,98  | 0,003855986 | 0,03650132  |
| ENSG00000204569 | PPP1R10       | 0,35  | 0,003856091 | 0,03650132  |
| ENSG00000156795 | WDYHV1        | -0,50 | 0,003865888 | 0,036576235 |
| ENSG00000256294 | ZNF225        | 0,54  | 0,003873927 | 0,036634448 |
| ENSG00000140682 | TGFB11        | -0,96 | 0,00388256  | 0,036698225 |
| ENSG00000166169 | POLL          | 0,37  | 0,003885317 | 0,036706418 |
| ENSG00000111885 | MAN1A1        | 0,62  | 0,003907965 | 0,036902434 |
| ENSG00000169490 | TM2D2         | -0,43 | 0,003916857 | 0,036968432 |
| ENSG00000131236 | CAP1          | -0,35 | 0,00391931  | 0,036973621 |
| ENSG00000241343 | RPL36A        | -0,76 | 0,003931198 | 0,037067762 |
| ENSG00000187257 | RSBN1L        | 0,43  | 0,003938918 | 0,037122532 |
| ENSG00000139146 | FAM60A        | -0,32 | 0,003967119 | 0,037370185 |
| ENSG00000148120 | C9orf3        | 0,56  | 0,003977744 | 0,037433964 |
| ENSG00000225193 | RPS12P26      | 0,93  | 0,003977259 | 0,037433964 |
| ENSG00000270069 | RP6-99M1.2    | -0,58 | 0,003980404 | 0,037440854 |

|                 |               |       |             |             |
|-----------------|---------------|-------|-------------|-------------|
| ENSG00000130948 | HSD17B3       | 0,92  | 0,003987267 | 0,037487258 |
| ENSG00000273432 | RP5-1165K10.2 | 1,08  | 0,004007629 | 0,03766047  |
| ENSG00000136383 | ALPK3         | -0,67 | 0,004042841 | 0,037926755 |
| ENSG00000137573 | SULF1         | 0,52  | 0,004042346 | 0,037926755 |
| ENSG00000145348 | TBCK          | 0,29  | 0,004043776 | 0,037926755 |
| ENSG00000256771 | ZNF253        | 0,44  | 0,004041429 | 0,037926755 |
| ENSG00000138380 | CARF          | 0,45  | 0,004046399 | 0,037933041 |
| ENSG00000185020 | RP11-111G23.1 | 0,86  | 0,004050987 | 0,037957729 |
| ENSG00000187605 | TET3          | -0,37 | 0,004061203 | 0,038035103 |
| ENSG00000116761 | CTH           | -0,87 | 0,004064084 | 0,038043742 |
| ENSG00000175518 | UBQLNL        | 0,82  | 0,004072894 | 0,038107849 |
| ENSG00000116396 | KCNC4         | 0,79  | 0,004096006 | 0,038305641 |
| ENSG00000214814 | FER1L6        | 0,44  | 0,00410352  | 0,03835745  |
| ENSG00000115380 | EFEMP1        | 0,41  | 0,004112126 | 0,038419403 |
| ENSG00000170881 | RNF139        | -0,39 | 0,004123301 | 0,038505284 |
| ENSG00000229127 | AC007038.7    | 0,74  | 0,00413103  | 0,038558928 |
| ENSG00000123191 | ATP7B         | 0,74  | 0,004134356 | 0,038560367 |
| ENSG00000148346 | LCN2          | -0,52 | 0,004135155 | 0,038560367 |
| ENSG00000143409 | FAM63A        | 0,39  | 0,004141141 | 0,038579151 |
| ENSG00000196724 | ZNF418        | 0,70  | 0,004140951 | 0,038579151 |
| ENSG00000206337 | HCP5          | -0,61 | 0,004182782 | 0,038948401 |
| ENSG00000259758 | CASC7         | -0,31 | 0,00419067  | 0,039003151 |
| ENSG00000150712 | MTMR12        | -0,36 | 0,004195763 | 0,039031849 |
| ENSG00000119681 | LTBP2         | -1,03 | 0,004199208 | 0,0390452   |
| ENSG00000118922 | KLF12         | -0,44 | 0,004207387 | 0,039102529 |
| ENSG00000095383 | TBC1D2        | -0,42 | 0,004217327 | 0,039176163 |
| ENSG00000122694 | GLIPR2        | 0,44  | 0,004225138 | 0,039211215 |
| ENSG00000125772 | GPCPD1        | -0,64 | 0,004224509 | 0,039211215 |
| ENSG00000079101 | CLUL1         | 0,89  | 0,00422984  | 0,039236108 |
| ENSG00000006831 | ADIPOR2       | -0,28 | 0,004238307 | 0,039295883 |
| ENSG00000181274 | FRAT2         | 0,50  | 0,004243356 | 0,039323923 |
| ENSG00000196562 | SULF2         | -0,65 | 0,004250849 | 0,039374575 |
| ENSG00000181035 | SLC25A42      | 0,55  | 0,00426547  | 0,039491177 |
| ENSG00000165516 | KLHDC2        | 0,44  | 0,004277788 | 0,039586356 |
| ENSG00000141562 | NARF          | 0,43  | 0,004286122 | 0,039589833 |
| ENSG00000176438 | SYNE3         | -1,06 | 0,004283244 | 0,039589833 |
| ENSG00000183691 | NOG           | -1,07 | 0,004282677 | 0,039589833 |
| ENSG00000219891 | ZSCAN12P1     | -0,94 | 0,004286317 | 0,039589833 |
| ENSG00000035720 | STAP1         | 1,07  | 0,00429964  | 0,039675154 |
| ENSG00000174780 | SRP72         | -0,40 | 0,00429872  | 0,039675154 |
| ENSG00000096006 | CRISP3        | 1,08  | 0,004328158 | 0,039919344 |
| ENSG00000120709 | FAM53C        | 0,30  | 0,004341007 | 0,039999863 |
| ENSG00000176407 | KCMF1         | -0,35 | 0,004340746 | 0,039999863 |
| ENSG00000123505 | AMD1          | -0,39 | 0,004357336 | 0,040131292 |



|                 |               |       |             |             |
|-----------------|---------------|-------|-------------|-------------|
| ENSG00000163702 | IL17RC        | 0,33  | 0,004375677 | 0,040271664 |
| ENSG00000261799 | RP11-283I3.6  | 0,47  | 0,004376724 | 0,040271664 |
| ENSG00000250685 | RP11-486L19.2 | 0,80  | 0,00443272  | 0,040767592 |
| ENSG00000152795 | HNRNPDL       | 0,35  | 0,004437523 | 0,040792449 |
| ENSG00000102572 | STK24         | -0,38 | 0,004453259 | 0,04091774  |
| ENSG00000135437 | RDH5          | 0,89  | 0,004458157 | 0,040924359 |
| ENSG00000167191 | GPRC5B        | 0,65  | 0,004458193 | 0,040924359 |
| ENSG00000048544 | MRPS10        | -0,32 | 0,004461895 | 0,040938991 |
| ENSG00000052795 | FNIP2         | -0,52 | 0,004477475 | 0,041062548 |
| ENSG00000271225 | RP11-460N11.3 | -1,06 | 0,004493227 | 0,041187558 |
| ENSG00000090238 | YPEL3         | 0,31  | 0,004498879 | 0,041216802 |
| ENSG00000119778 | ATAD2B        | 0,39  | 0,004500661 | 0,041216802 |
| ENSG00000107937 | GTPBP4        | -0,31 | 0,004505944 | 0,041245737 |
| ENSG00000141542 | RAB40B        | 0,47  | 0,004554914 | 0,04165473  |
| ENSG00000172974 | AC007318.5    | -0,40 | 0,004553651 | 0,04165473  |
| ENSG00000235706 | DICER1-AS1    | 0,76  | 0,004561206 | 0,041692643 |
| ENSG00000137413 | TAF8          | 0,36  | 0,004566107 | 0,041717811 |
| ENSG00000124126 | PREX1         | -0,82 | 0,004570311 | 0,041736588 |
| ENSG00000171303 | KCNK3         | -0,99 | 0,00459422  | 0,041935209 |
| ENSG00000056558 | TRAF1         | -0,56 | 0,004603224 | 0,041977949 |
| ENSG00000237596 | RP13-143G15.4 | -1,05 | 0,00460243  | 0,041977949 |
| ENSG00000222937 | SNORD63       | -0,91 | 0,004614423 | 0,042060325 |
| ENSG00000101213 | PTK6          | 0,57  | 0,004654188 | 0,042402885 |
| ENSG00000130508 | PXDN          | -0,74 | 0,004666552 | 0,042495598 |
| ENSG00000165240 | ATP7A         | 0,35  | 0,004677348 | 0,042573952 |
| ENSG00000108342 | CSF3          | -1,06 | 0,004694797 | 0,042691112 |
| ENSG00000117592 | PRDX6         | 0,41  | 0,004696814 | 0,042691112 |
| ENSG00000260589 | RP11-390B4.5  | 0,98  | 0,004692618 | 0,042691112 |
| ENSG00000272695 | GAS6-AS2      | -1,04 | 0,004707631 | 0,04276942  |
| ENSG00000171843 | MLLT3         | 0,34  | 0,004714026 | 0,0428075   |
| ENSG00000155380 | SLC16A1       | -0,43 | 0,004725401 | 0,042890743 |
| ENSG00000256525 | POLG2         | 0,49  | 0,004732949 | 0,042939184 |
| ENSG00000111276 | CDKN1B        | 0,41  | 0,004737957 | 0,042964559 |
| ENSG00000110400 | PVRL1         | 0,64  | 0,004751293 | 0,043058422 |
| ENSG00000167380 | ZNF226        | 0,40  | 0,004752742 | 0,043058422 |
| ENSG00000224660 | SH3BP5-AS1    | 0,47  | 0,004757958 | 0,043085582 |
| ENSG00000101888 | NXT2          | -0,52 | 0,004780749 | 0,04327179  |
| ENSG00000242802 | AP5Z1         | -0,46 | 0,004799873 | 0,043424653 |
| ENSG00000105483 | CARD8         | 0,53  | 0,004809476 | 0,043491273 |
| ENSG00000149929 | HIRIP3        | 0,51  | 0,004813077 | 0,043503583 |
| ENSG00000080854 | IGSF9B        | -0,80 | 0,004826194 | 0,043601861 |
| ENSG00000127527 | EPS15L1       | -0,38 | 0,00485306  | 0,043783483 |
| ENSG00000132359 | RAP1GAP2      | -0,96 | 0,004848903 | 0,043783483 |
| ENSG00000227039 | ITGB2-AS1     | 0,83  | 0,004850923 | 0,043783483 |

|                 |                         |       |             |             |
|-----------------|-------------------------|-------|-------------|-------------|
| ENSG00000065833 | ME1                     | -0,61 | 0,0048592   | 0,043818522 |
| ENSG00000272316 | XXbac-<br>BPGBPG55C20.2 | 0,68  | 0,004868166 | 0,043879009 |
| ENSG00000174136 | RGMB                    | 0,33  | 0,004872772 | 0,043900152 |
| ENSG00000213339 | QTRT1                   | 0,31  | 0,004887482 | 0,043991871 |
| ENSG00000260793 | RP5-882C2.2             | 0,58  | 0,004885534 | 0,043991871 |
| ENSG00000090674 | MCOLN1                  | -0,49 | 0,004894871 | 0,044037964 |
| ENSG00000174501 | ANKRD36C                | 0,45  | 0,00491341  | 0,044164661 |
| ENSG00000214063 | TSPAN4                  | -0,52 | 0,0049135   | 0,044164661 |
| ENSG00000156136 | DCK                     | -0,43 | 0,004916896 | 0,044174743 |
| ENSG00000260729 | RP11-106M3.2            | 0,83  | 0,004924635 | 0,044223818 |
| ENSG00000069956 | MAPK6                   | -0,39 | 0,004934652 | 0,04429329  |
| ENSG00000028116 | VRK2                    | -0,39 | 0,004939153 | 0,044313211 |
| ENSG00000100387 | RBX1                    | 0,52  | 0,004945403 | 0,044337651 |
| ENSG00000196705 | ZNF431                  | 0,43  | 0,004946442 | 0,044337651 |
| ENSG00000132376 | INPP5K                  | -0,34 | 0,004960361 | 0,044421419 |
| ENSG00000141428 | C18orf21                | -0,49 | 0,00495856  | 0,044421419 |
| ENSG00000154359 | LONRF1                  | -0,52 | 0,004964168 | 0,044435023 |
| ENSG00000155034 | FBXL18                  | -0,51 | 0,004976986 | 0,044529236 |
| ENSG00000168661 | ZNF30                   | 0,63  | 0,004986056 | 0,044589851 |
| ENSG00000087087 | SRRT                    | 0,29  | 0,005003461 | 0,044704333 |
| ENSG00000224051 | GLTPD1                  | -0,37 | 0,005001918 | 0,044704333 |
| ENSG00000128849 | CGNL1                   | -0,94 | 0,005015139 | 0,04476749  |
| ENSG00000144579 | CTDSP1                  | 0,59  | 0,005014807 | 0,04476749  |
| ENSG00000133460 | SLC2A11                 | 0,45  | 0,005028225 | 0,044863685 |
| ENSG00000170571 | EMB                     | -0,41 | 0,005033402 | 0,04488926  |
| ENSG00000161653 | NAGS                    | -0,69 | 0,005042213 | 0,044947199 |
| ENSG00000125945 | ZNF436                  | 0,50  | 0,005056094 | 0,045050262 |
| ENSG00000189056 | RELN                    | -1,05 | 0,005074294 | 0,045170983 |
| ENSG00000244300 | RP11-475N22.4           | -1,04 | 0,005073773 | 0,045170983 |
| ENSG00000179909 | ZNF154                  | 0,73  | 0,00508306  | 0,045228293 |
| ENSG00000053747 | LAMA3                   | -0,72 | 0,005101876 | 0,045352171 |
| ENSG00000118200 | CAMSAP2                 | -0,50 | 0,005101925 | 0,045352171 |
| ENSG00000204758 | CTC-308K20.1            | -1,02 | 0,005103987 | 0,045352171 |
| ENSG00000271857 | RP1-244F24.1            | 0,95  | 0,005108043 | 0,045367454 |
| ENSG00000259342 | RP11-519G16.5           | -1,05 | 0,005118385 | 0,045438536 |
| ENSG00000174977 | AC026271.5              | -0,31 | 0,005131674 | 0,045535694 |
| ENSG00000136444 | RSAD1                   | 0,42  | 0,005136059 | 0,045553795 |
| ENSG00000149798 | CDC42EP2                | -0,46 | 0,00514236  | 0,045588866 |
| ENSG00000271895 | RP4-635E18.8            | 0,58  | 0,005144823 | 0,04558989  |
| ENSG00000103091 | WDR59                   | 0,33  | 0,00515214  | 0,045633911 |
| ENSG00000128590 | DNAJB9                  | -0,57 | 0,005154894 | 0,045637495 |
| ENSG00000138670 | RASGEF1B                | -0,47 | 0,005164461 | 0,045701363 |
| ENSG00000156671 | SAMD8                   | 0,38  | 0,005170264 | 0,045731876 |
| ENSG00000144730 | IL17RD                  | -0,66 | 0,005183817 | 0,045830888 |

|                 |                |       |             |             |
|-----------------|----------------|-------|-------------|-------------|
| ENSG00000161682 | FAM171A2       | -0,98 | 0,005194629 | 0,04590558  |
| ENSG00000183718 | TRIM52         | 0,54  | 0,005200202 | 0,045933938 |
| ENSG00000096384 | HSP90AB1       | -0,31 | 0,005206694 | 0,045970372 |
| ENSG00000010704 | HFE            | 0,57  | 0,005215415 | 0,046026454 |
| ENSG00000132603 | NIP7           | -0,40 | 0,005221514 | 0,046054961 |
| ENSG00000233223 | AC113189.5     | 0,59  | 0,005223387 | 0,046054961 |
| ENSG00000160471 | COX6B2         | -0,93 | 0,005235261 | 0,046138706 |
| ENSG00000259264 | RP11-60L3.1    | -0,75 | 0,00525206  | 0,046265769 |
| ENSG00000100376 | FAM118A        | 0,33  | 0,0052667   | 0,046373701 |
| ENSG00000221909 | FAM200A        | 0,40  | 0,005275247 | 0,046427909 |
| ENSG00000261962 | AC009133.20    | 1,01  | 0,00528996  | 0,046536319 |
| ENSG00000139626 | ITGB7          | 0,74  | 0,00530389  | 0,046637741 |
| ENSG00000164088 | PPM1M          | 0,55  | 0,005318306 | 0,046743338 |
| ENSG00000173991 | TCAP           | 0,84  | 0,005331481 | 0,046823902 |
| ENSG00000189184 | PCDH18         | 1,05  | 0,005332294 | 0,046823902 |
| ENSG00000007255 | TRAPPC6A       | 0,45  | 0,005349081 | 0,046950088 |
| ENSG00000176463 | SLCO3A1        | -0,68 | 0,005353464 | 0,046967336 |
| ENSG00000113643 | RARS           | -0,29 | 0,005362381 | 0,047020259 |
| ENSG00000182667 | NTM            | -1,04 | 0,005364338 | 0,047020259 |
| ENSG00000081059 | TCF7           | -0,83 | 0,005374189 | 0,04708536  |
| ENSG00000123358 | NR4A1          | -0,87 | 0,005382924 | 0,047140628 |
| ENSG00000164181 | ELOVL7         | -0,50 | 0,005391385 | 0,047185518 |
| ENSG00000177508 | IRX3           | 0,65  | 0,005393621 | 0,047185518 |
| ENSG00000264538 | SUZ12P         | 0,43  | 0,005395337 | 0,047185518 |
| ENSG00000143033 | MTF2           | 0,33  | 0,005398261 | 0,047189843 |
| ENSG00000267481 | CTC-559E9.5    | 0,76  | 0,005403954 | 0,047218351 |
| ENSG00000147202 | DIAPH2         | -0,50 | 0,005420572 | 0,04734226  |
| ENSG00000102755 | FLT1           | 1,03  | 0,005436434 | 0,047459461 |
| ENSG00000269929 | RP11-2B6.2     | -0,59 | 0,005444656 | 0,047509885 |
| ENSG00000120832 | MTERFD3        | 0,53  | 0,005480555 | 0,047799701 |
| ENSG00000171517 | LPAR3          | 0,55  | 0,005484391 | 0,047799701 |
| ENSG00000259087 | RP11-356O9.2   | 0,79  | 0,005485252 | 0,047799701 |
| ENSG00000134339 | SAA2           | -0,90 | 0,005502695 | 0,047869591 |
| ENSG00000166801 | FAM111A        | 0,49  | 0,005497252 | 0,047869591 |
| ENSG00000229152 | ANKRD10-IT1    | 0,53  | 0,00550313  | 0,047869591 |
| ENSG00000255559 | ZNF252P-AS1    | 1,05  | 0,005498509 | 0,047869591 |
| ENSG00000134186 | PRPF38B        | 0,38  | 0,005532293 | 0,048080209 |
| ENSG00000160447 | PKN3           | 0,44  | 0,005531213 | 0,048080209 |
| ENSG00000165105 | RASEF          | -0,34 | 0,005542038 | 0,048143358 |
| ENSG00000152527 | PLEKHH2        | 0,74  | 0,005581192 | 0,048454286 |
| ENSG00000232098 | CTD-2619J13.14 | 0,53  | 0,005585314 | 0,048454286 |
| ENSG00000272382 | CTD-2035E11.4  | 0,94  | 0,005583465 | 0,048454286 |
| ENSG00000094841 | UPRT           | 0,34  | 0,005588123 | 0,048457007 |
| ENSG00000186462 | NAP1L2         | 0,77  | 0,005611208 | 0,048619395 |

|                 |               |       |             |             |
|-----------------|---------------|-------|-------------|-------------|
| ENSG00000198074 | AKR1B10       | 0,53  | 0,005611856 | 0,048619395 |
| ENSG00000157551 | KCNJ15        | 0,61  | 0,00563018  | 0,048756406 |
| ENSG00000188647 | PTAR1         | 0,36  | 0,00563993  | 0,048819071 |
| ENSG00000146828 | SLC12A9       | 0,42  | 0,005647689 | 0,048854973 |
| ENSG00000163291 | PAQR3         | -0,48 | 0,005649108 | 0,048854973 |
| ENSG00000123179 | EBPL          | 0,46  | 0,005653131 | 0,048868011 |
| ENSG00000152284 | TCF7L1        | 0,54  | 0,005659561 | 0,048901829 |
| ENSG00000149489 | ROM1          | 0,67  | 0,005672998 | 0,048996141 |
| ENSG00000128245 | YWHAH         | -0,54 | 0,005691813 | 0,049127219 |
| ENSG00000129167 | TPH1          | 0,90  | 0,005698292 | 0,049127219 |
| ENSG00000163083 | INHBB         | -0,79 | 0,005697671 | 0,049127219 |
| ENSG00000272343 | RP11-140I16.3 | 1,01  | 0,005697421 | 0,049127219 |
| ENSG00000088992 | TESC          | 1,04  | 0,005731482 | 0,049359046 |
| ENSG00000138771 | SHROOM3       | -0,47 | 0,00573423  | 0,049359046 |
| ENSG00000141424 | SLC39A6       | -0,37 | 0,005731216 | 0,049359046 |
| ENSG00000249007 | RP11-510N19.5 | 0,69  | 0,005735346 | 0,049359046 |
| ENSG00000081721 | DUSP12        | -0,51 | 0,005744108 | 0,049412553 |
| ENSG00000074660 | SCARF1        | 0,60  | 0,005762028 | 0,049522848 |
| ENSG00000111731 | C2CD5         | 0,39  | 0,005761155 | 0,049522848 |
| ENSG00000124098 | FAM210B       | -0,42 | 0,005783707 | 0,049687183 |
| ENSG00000221963 | APOL6         | -0,47 | 0,005796341 | 0,04977371  |
| ENSG00000054219 | LY75          | 0,49  | 0,00579929  | 0,049777027 |
| ENSG00000231341 | VDAC1P6       | -0,99 | 0,0058072   | 0,049822905 |
